# Supplementary material for: New Thienobenzo/Naphtho-Triazoles as Butyrylcholinesterase Inhibitors: Design, Synthesis and Computational Study
Source: MDPI journal article supplement (doi:10.3390/ijms24065879), 2023-03-20
Supplement: s1 [file s1]

# New Thienobenzo/Naphtho-Triazoles as Butyrylcholinesterase Inhibitors. Design, Synthesis and Computational Study

Milena Mlakić <sup>1,†</sup>, Ida Selec <sup>1,2,†</sup>, Irena Čaleta <sup>2,\*</sup>, Ilijana Odak <sup>3</sup>, Danijela Barić <sup>4</sup>, Ana Ratković <sup>2</sup>, Krešimir Molčanov <sup>5</sup> and Irena Škorić <sup>1,\*</sup>

<sup>1</sup> Department of Organic Chemistry, Faculty of Chemical Engineering and Technology, University of Zagreb, Marulićev trg 19, HR-10000 Zagreb, Croatia

<sup>2</sup> Chemistry, Selvita Ltd., Prilaz Baruna Filipovića 29, HR-10000 Zagreb, Croatia

<sup>3</sup> Department of Chemistry, Faculty of Science and Education, University of Mostar, Matice hrvatske bb, 88000 Mostar, Bosnia and Herzegovina

<sup>4</sup> Group for Computational Life Sciences, Division of Physical Chemistry, Ruđer Bošković Institute, Bijenička cesta 54, HR-10000 Zagreb, Croatia

<sup>5</sup> Division of Physical Chemistry, Ruđer Bošković Institute, Bijenička cesta 54, HR-10000 Zagreb, Croatia

\* Correspondence: iskoric@fkit.hr (I.Š.), Tel.: +385-1-4597 241; irena.caleta@selvita.com (I.Č.), Tel.: +385-1-888 63 87

† These authors contributed equally to this work.

## Content:

1. <sup>1</sup>H and <sup>13</sup>C NMR spectra of synthesized compounds (Figs S1–S62)
2. MS spectra and HRMS analyses of synthesized compounds (Figs S63–S79)
3. Cartesian coordinates of ligands docked into AChE and BChE
4. Estimated free energies of binding obtained by molecular docking (Table S1)
5. Crystallographic and refinement data for the structure **5** (Table S2)
6. Reorganized experimental results on the inhibitory activity of 1-19 (Table S3)

## 1. $^1\text{H}$ and $^{13}\text{C}$ NMR spectra of synthesized compounds

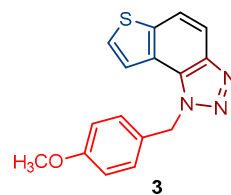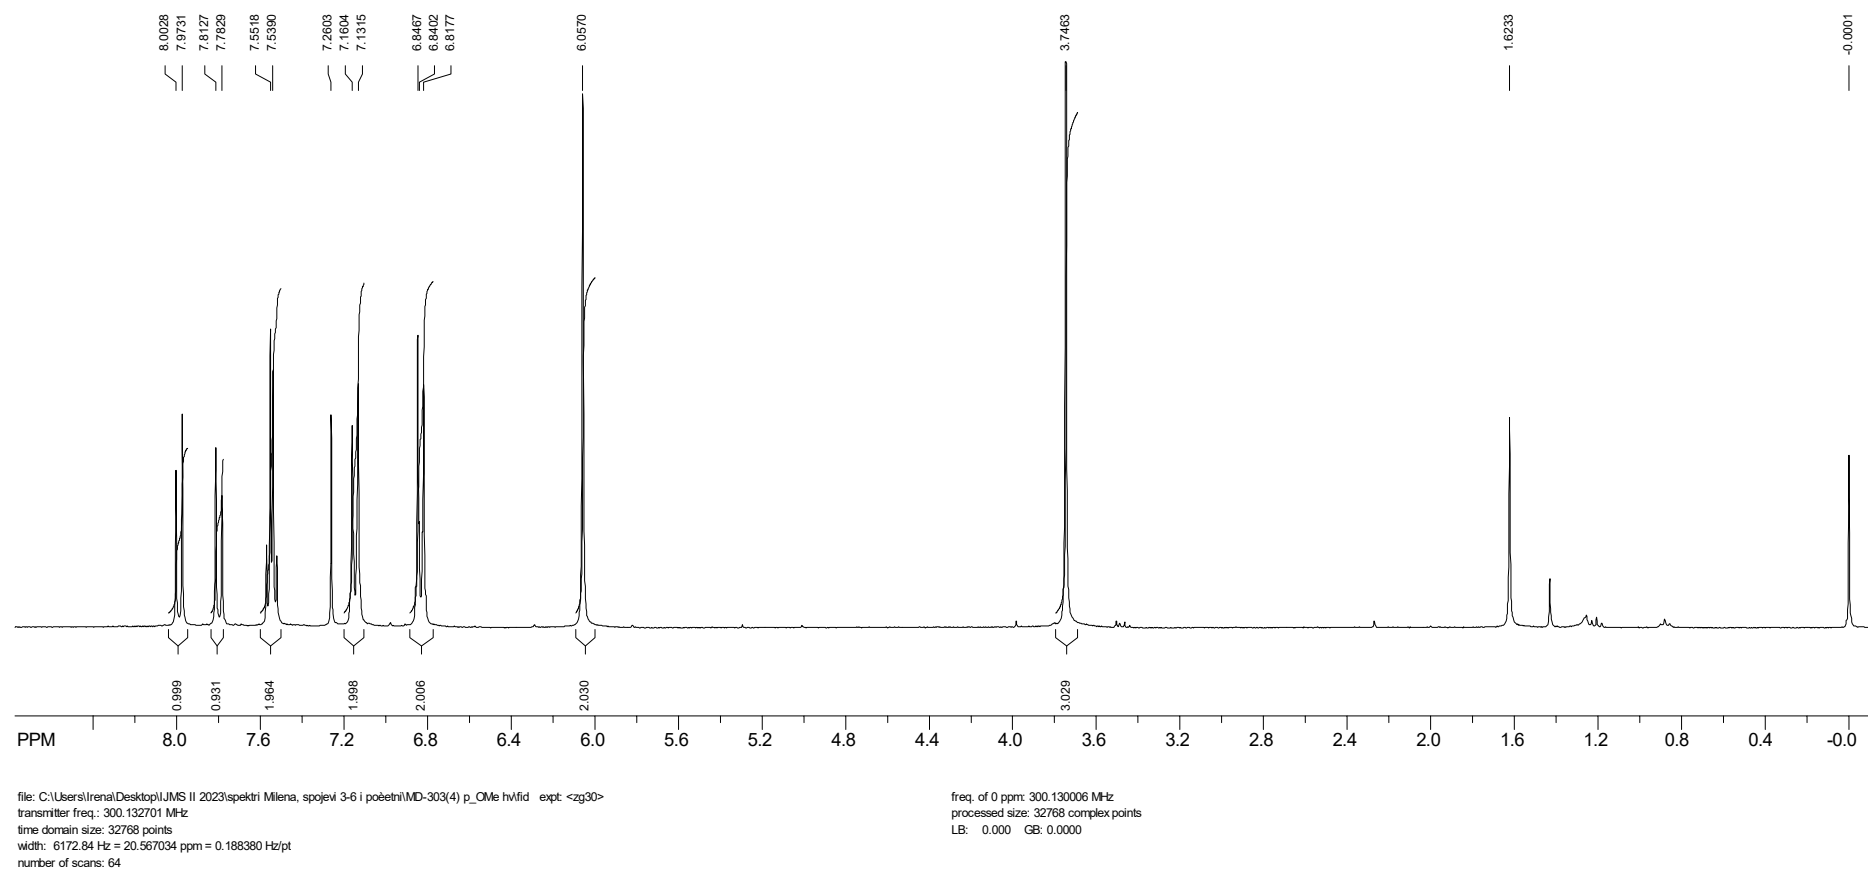

**Figure S1.**  $^1\text{H}$  NMR spectrum ( $\text{CDCl}_3$ ) of compound **3**.

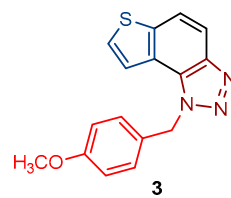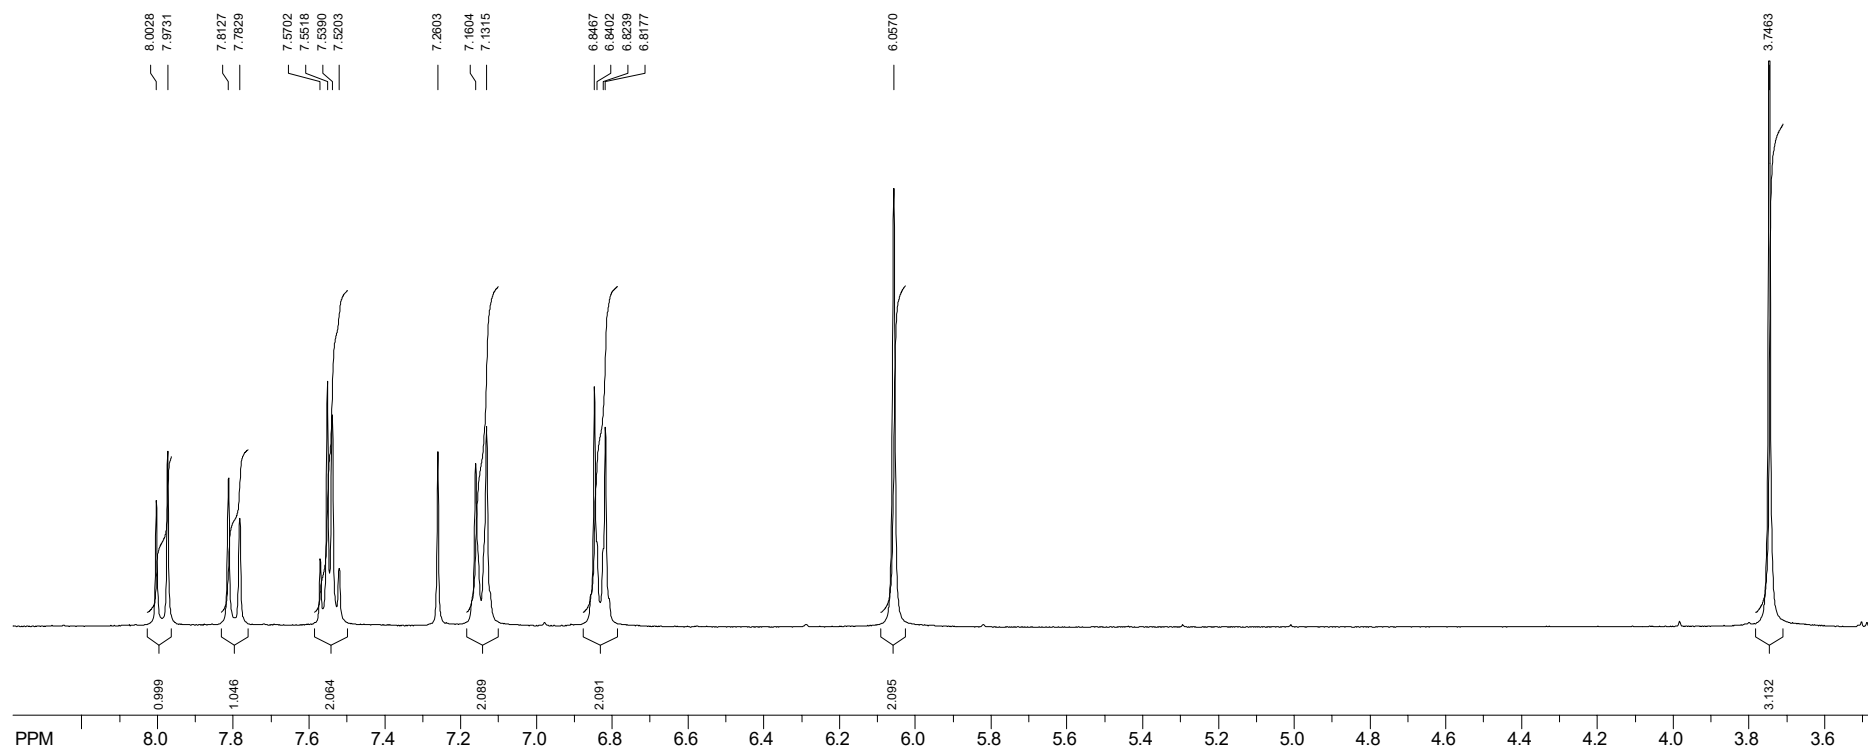

file: C:\Users\Irena\Desktop\JMS II 2023\spektri Milena, spojevi 3-6 i poeetni\MD-303(4) p\_OMe hvfid exp: <zg30>  
 transmitter freq.: 300.132701 MHz  
 time domain size: 32768 points  
 width: 6172.84 Hz = 20.567034 ppm = 0.188380 Hz/pt  
 number of scans: 64

freq. of 0 ppm: 300.130006 MHz  
 processed size: 32768 complex points  
 LB: 0.000 GB: 0.0000

**Figure S2.** Part of the  $^1\text{H}$  NMR spectrum ( $\text{CDCl}_3$ ) of compound **3**.

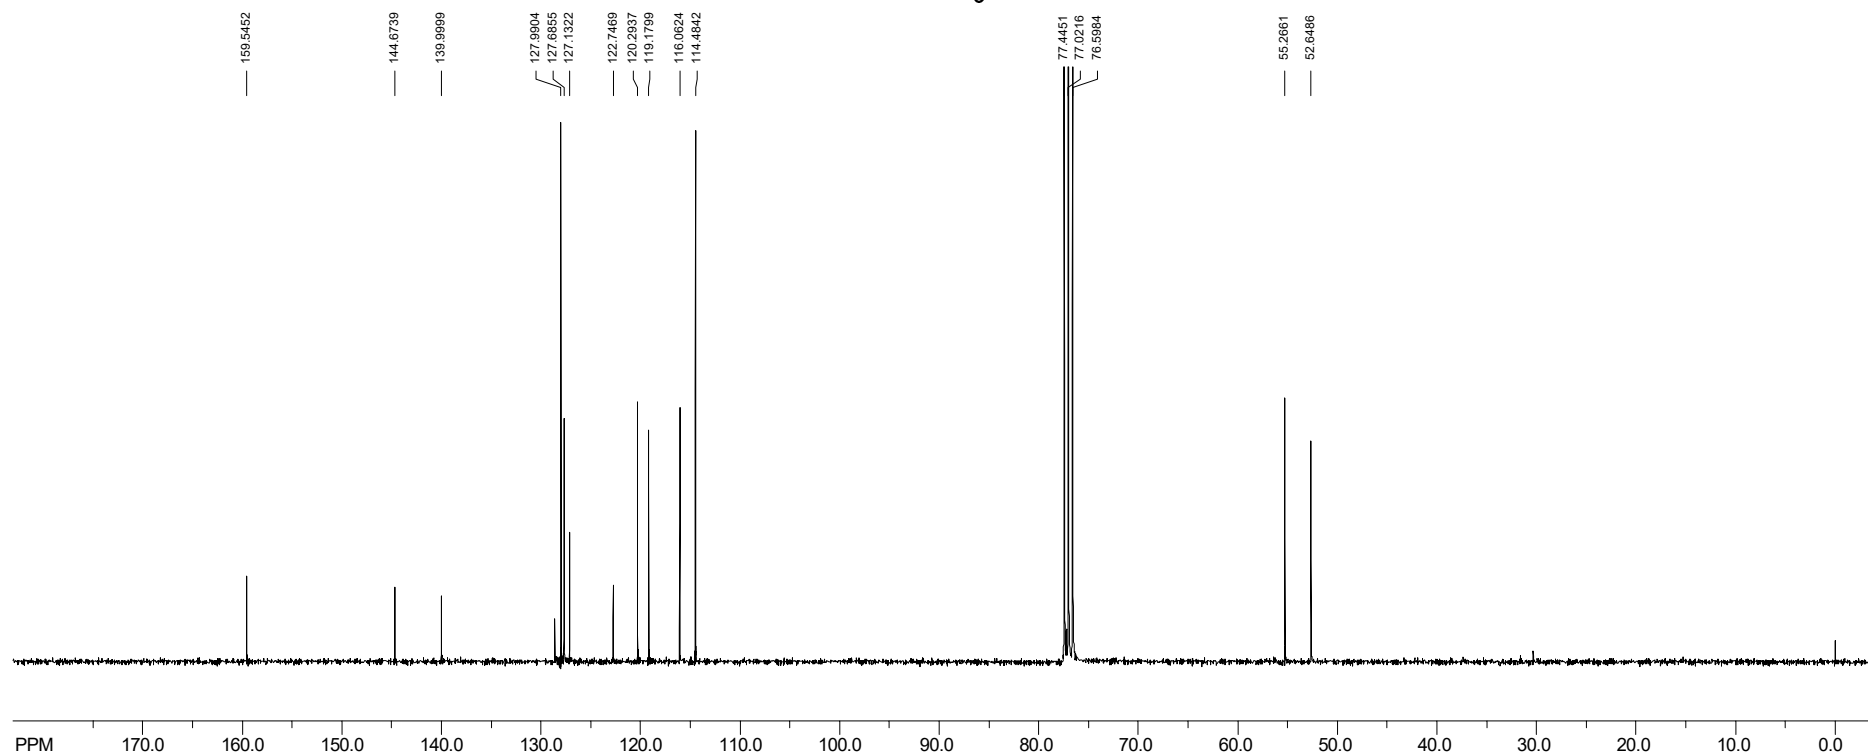

file: C:\Users\Irena\Desktop\JMS II 2023\spektri Milena, spojevi 3-6 i početni\MD-303(4) 13C\fid exp: <zpgp30>  
transmitter freq.: 75.475295 MHz  
time domain size: 32768 points  
width: 17965.61 Hz = 238.297995 ppm = 0.548877 Hz/pt  
number of scans: 32225

freq. of 0 ppm: 75.467749 MHz  
processed size: 32768 complex points  
LB: 0.000 GB: 0.0000

**Figure S3.**  $^1\text{H}$  NMR spectrum ( $\text{CDCl}_3$ ) of compound **3**.



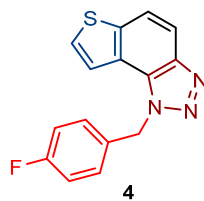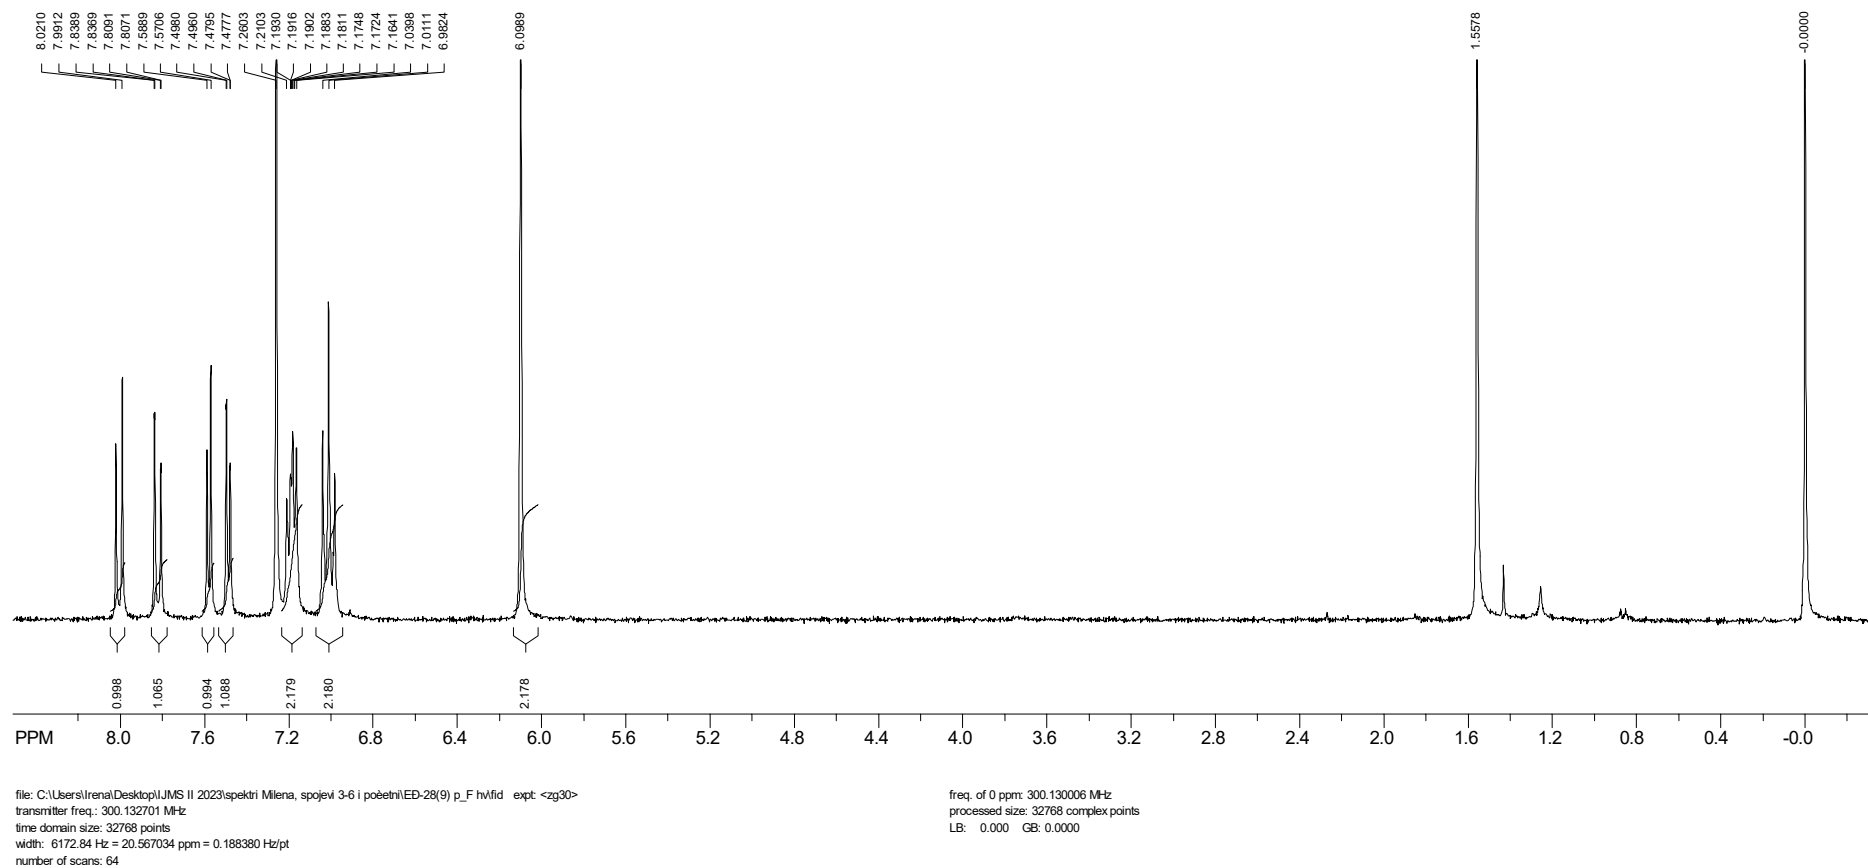

**Figure S4.**  $^1\text{H}$  NMR spectrum ( $\text{CDCl}_3$ ) of compound **4**.

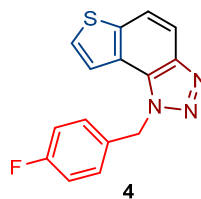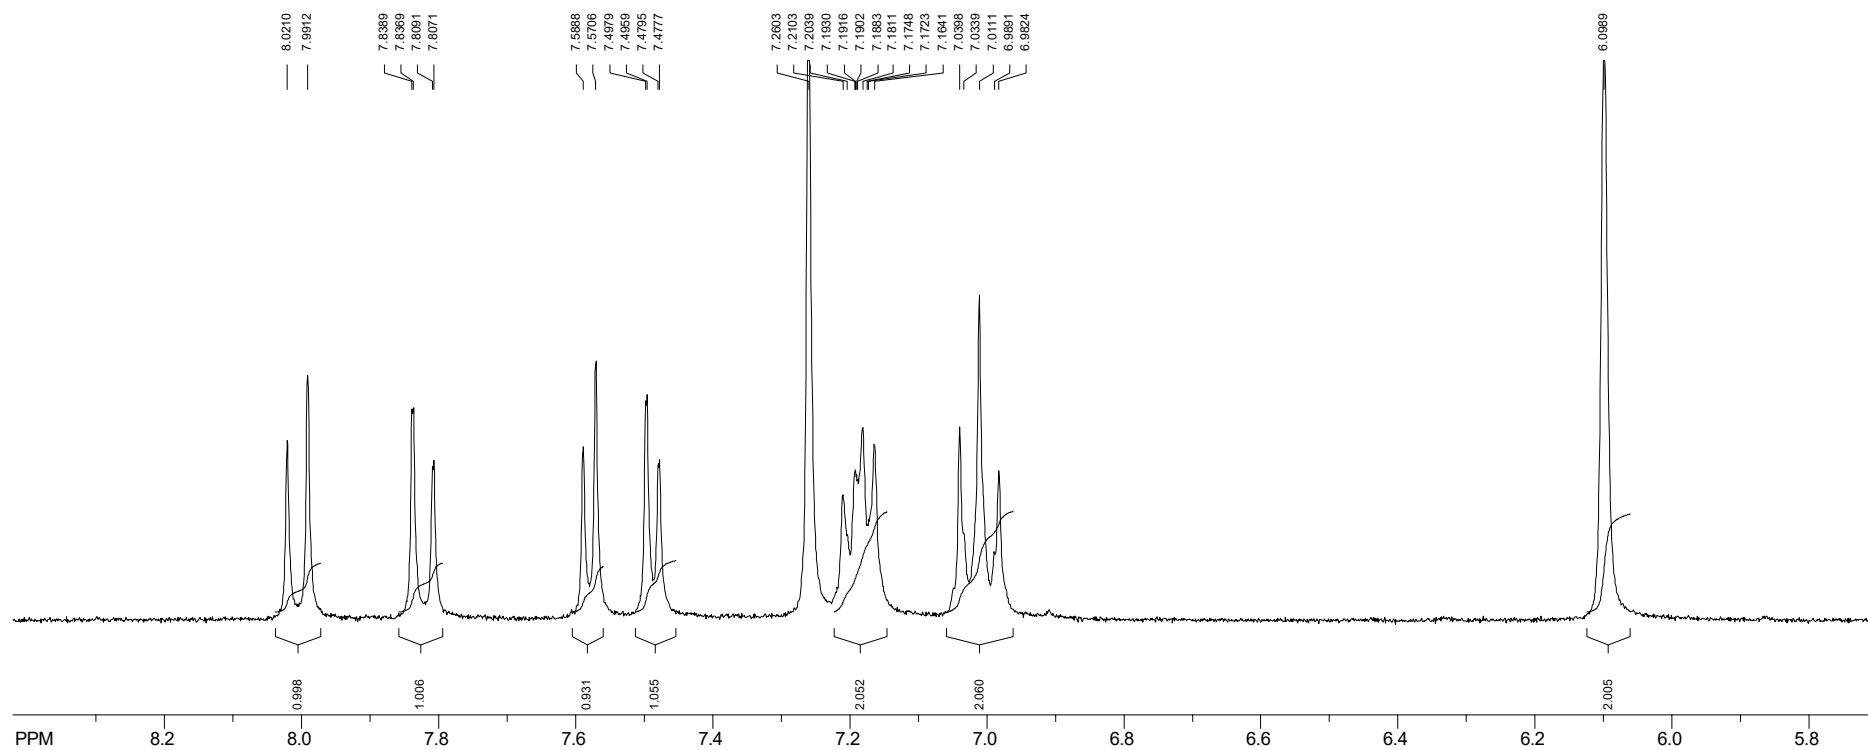

file: C:\Users\Irena\Desktop\JMS II 2023\spektri Milena, spojevi 3-6 i poeetri\ED-28(9) p\_F hv\fid exp: <zg30>  
 transmitter freq.: 300.132701 MHz  
 time domain size: 32768 points  
 width: 6172.84 Hz = 20.567034 ppm = 0.188380 Hz/pt  
 number of scans: 64

freq. of 0 ppm: 300.130006 MHz  
 processed size: 32768 complex points  
 LB: 0.000 GB: 0.0000

**Figure S5.** Part of the  $^1\text{H}$  NMR spectrum ( $\text{CDCl}_3$ ) of compound **4**.

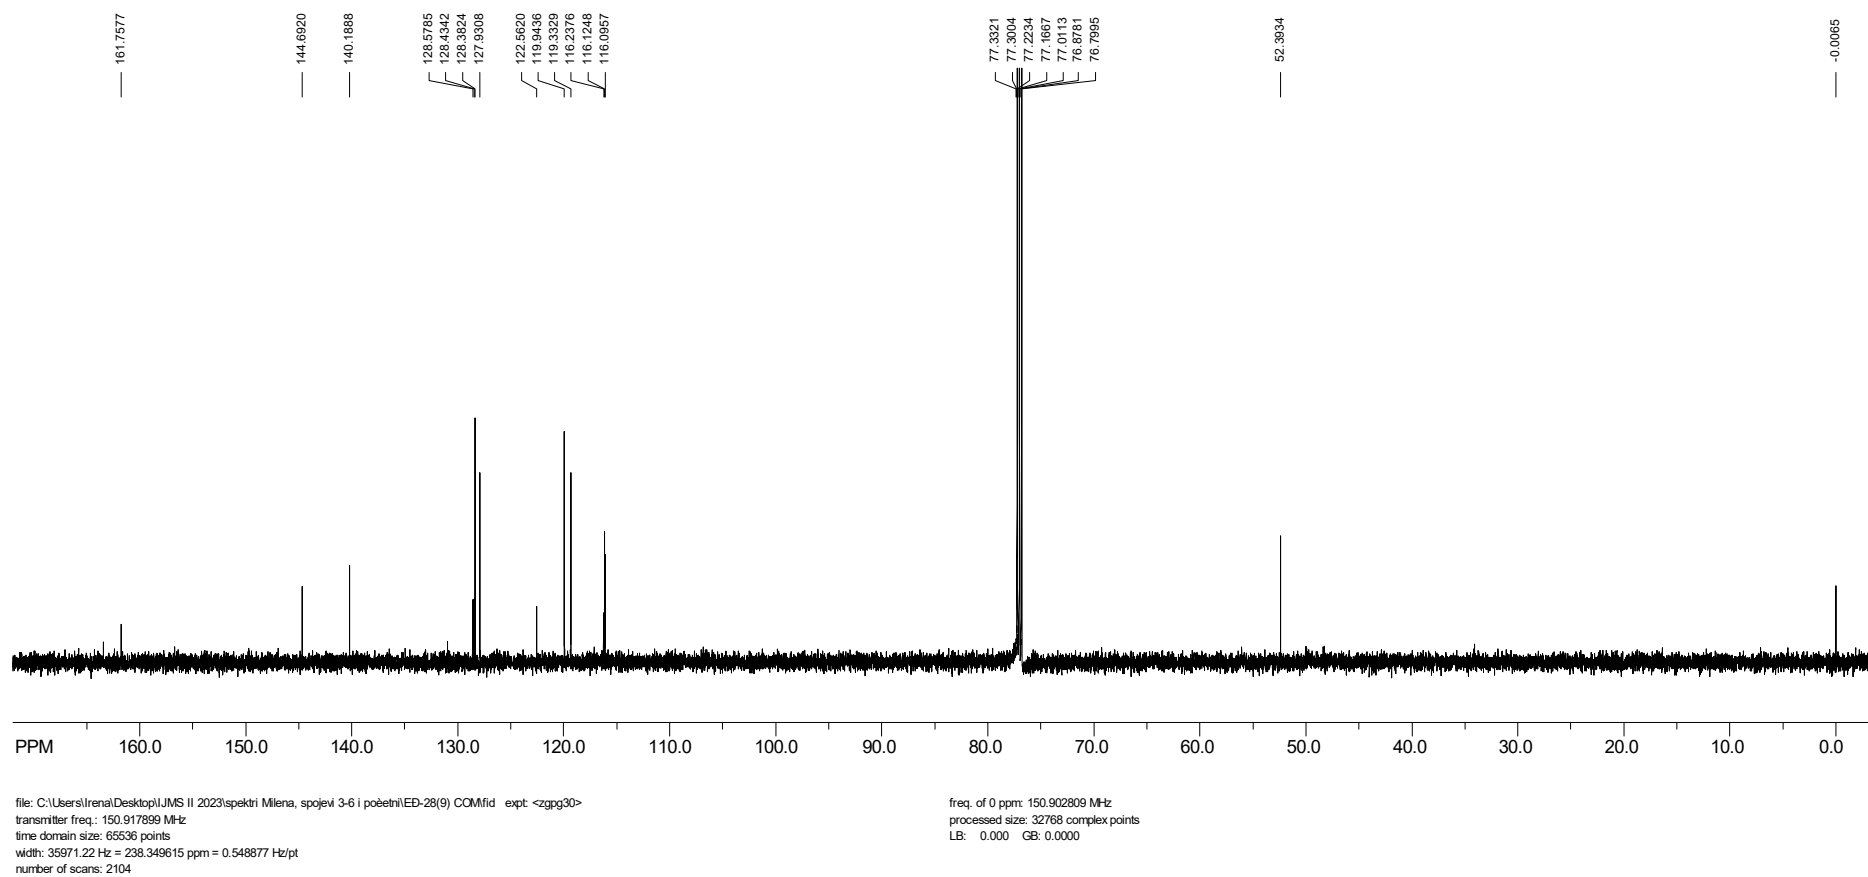

**Figure S6.**  $^{13}\text{C}$  NMR spectrum ( $\text{CDCl}_3$ ) of compound **4**.

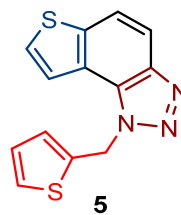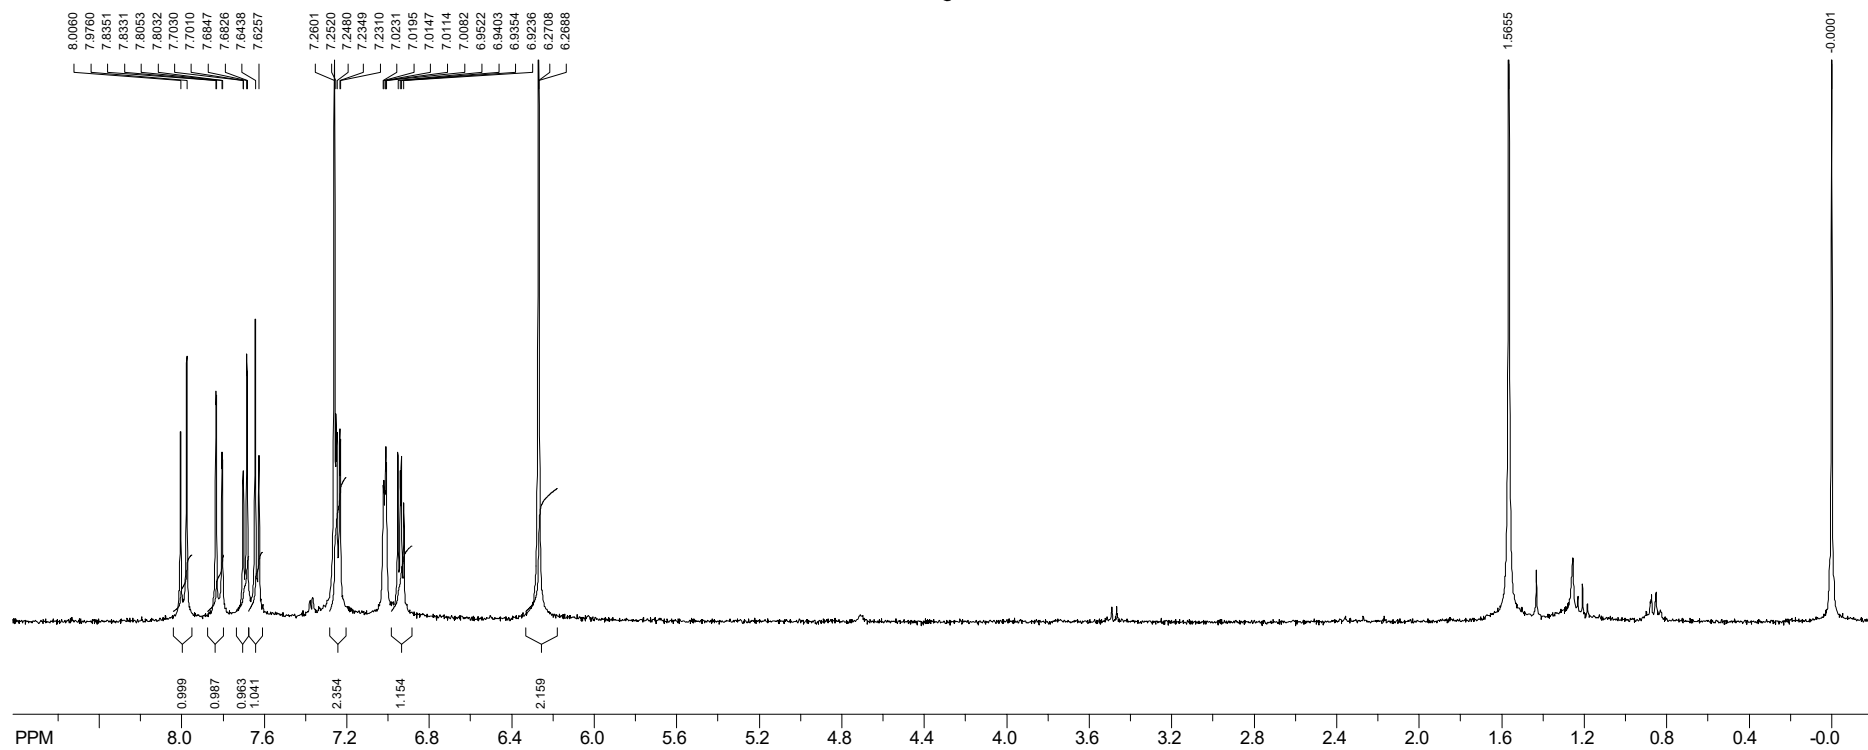

file: C:\Users\Irena\Desktop\JMS II 2023\spektri Milena, spojevi 3-6 i početni\ED-29(7-8) 2\_lto hv\fid exp: <zg30>  
 transmitter freq.: 300.132701 MHz  
 time domain size: 32768 points  
 width: 6172.84 Hz = 20.567034 ppm = 0.188380 Hz/pt  
 number of scans: 64

freq. of 0 ppm: 300.130006 MHz  
 processed size: 32768 complex points  
 LB: 0.000 GB: 0.0000

**Figure S7.**  $^1\text{H}$  NMR spectrum ( $\text{CDCl}_3$ ) of compound **5**.

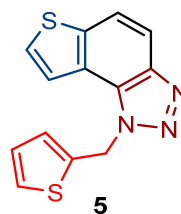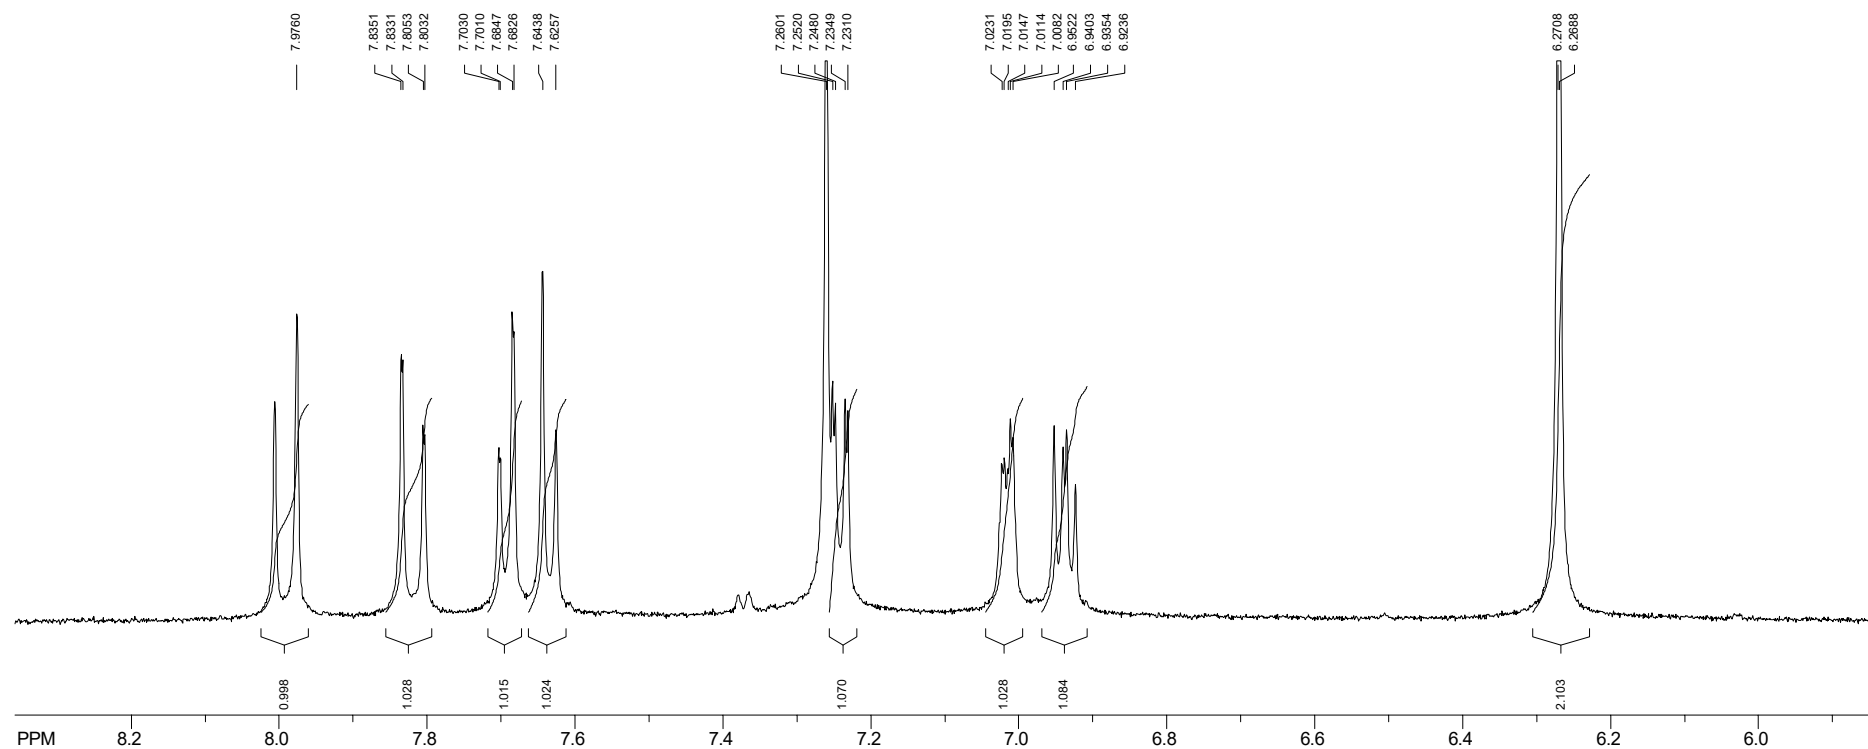

file: C:\Users\Irena\Desktop\JMS II 2023\spektri Milena, spojevi 3-6 i pobetni\ED-29(7-8) 2\_ilo hvlfid exp: <zg30>  
 transmitter freq.: 300.132701 MHz  
 time domain size: 32768 points  
 width: 6172.84 Hz = 20.567034 ppm = 0.188380 Hz/pt  
 number of scans: 64

freq. of 0 ppm: 300.130006 MHz  
 processed size: 32768 complex points  
 LB: 0.000 GB: 0.0000

**Figure S8.** Part of the  $^1\text{H}$  NMR spectrum ( $\text{CDCl}_3$ ) of compound **5**.

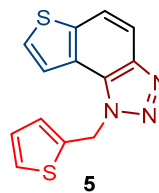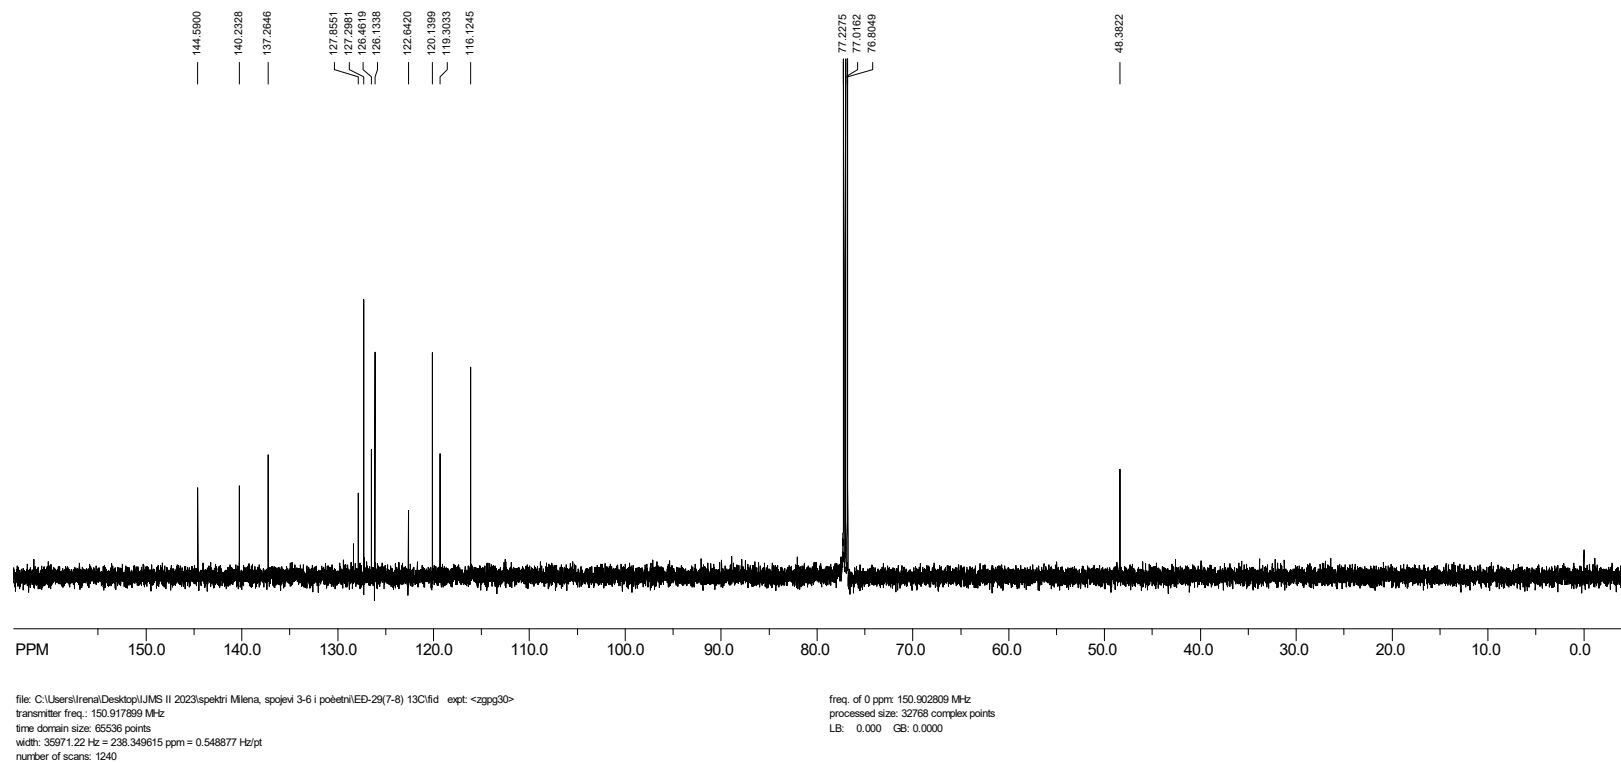

**Figure S9.**  $^{13}\text{C}$  NMR spectrum ( $\text{CDCl}_3$ ) of compound **5**.

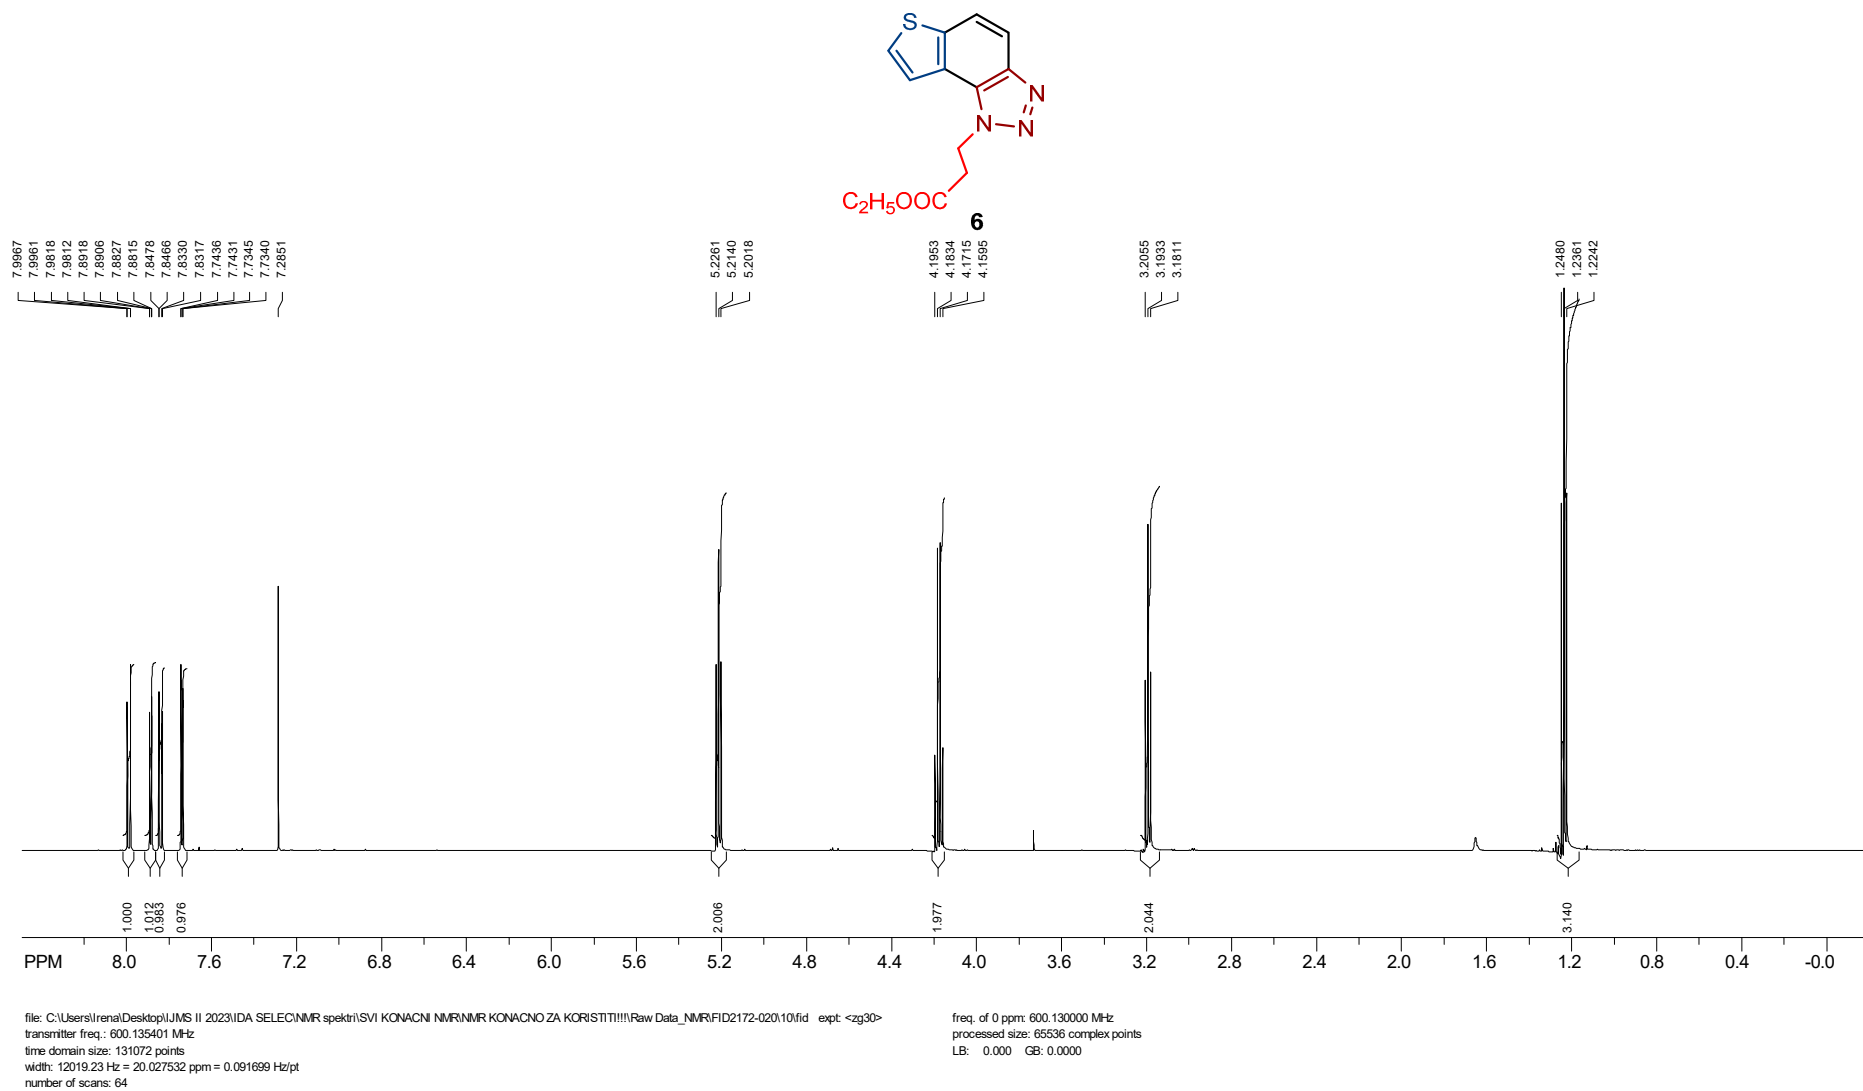

**Figure S10.**  $^1\text{H}$  NMR spectrum ( $\text{CDCl}_3$ ) of compound **6**.

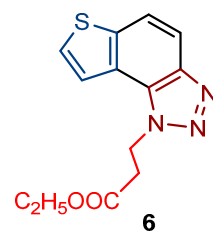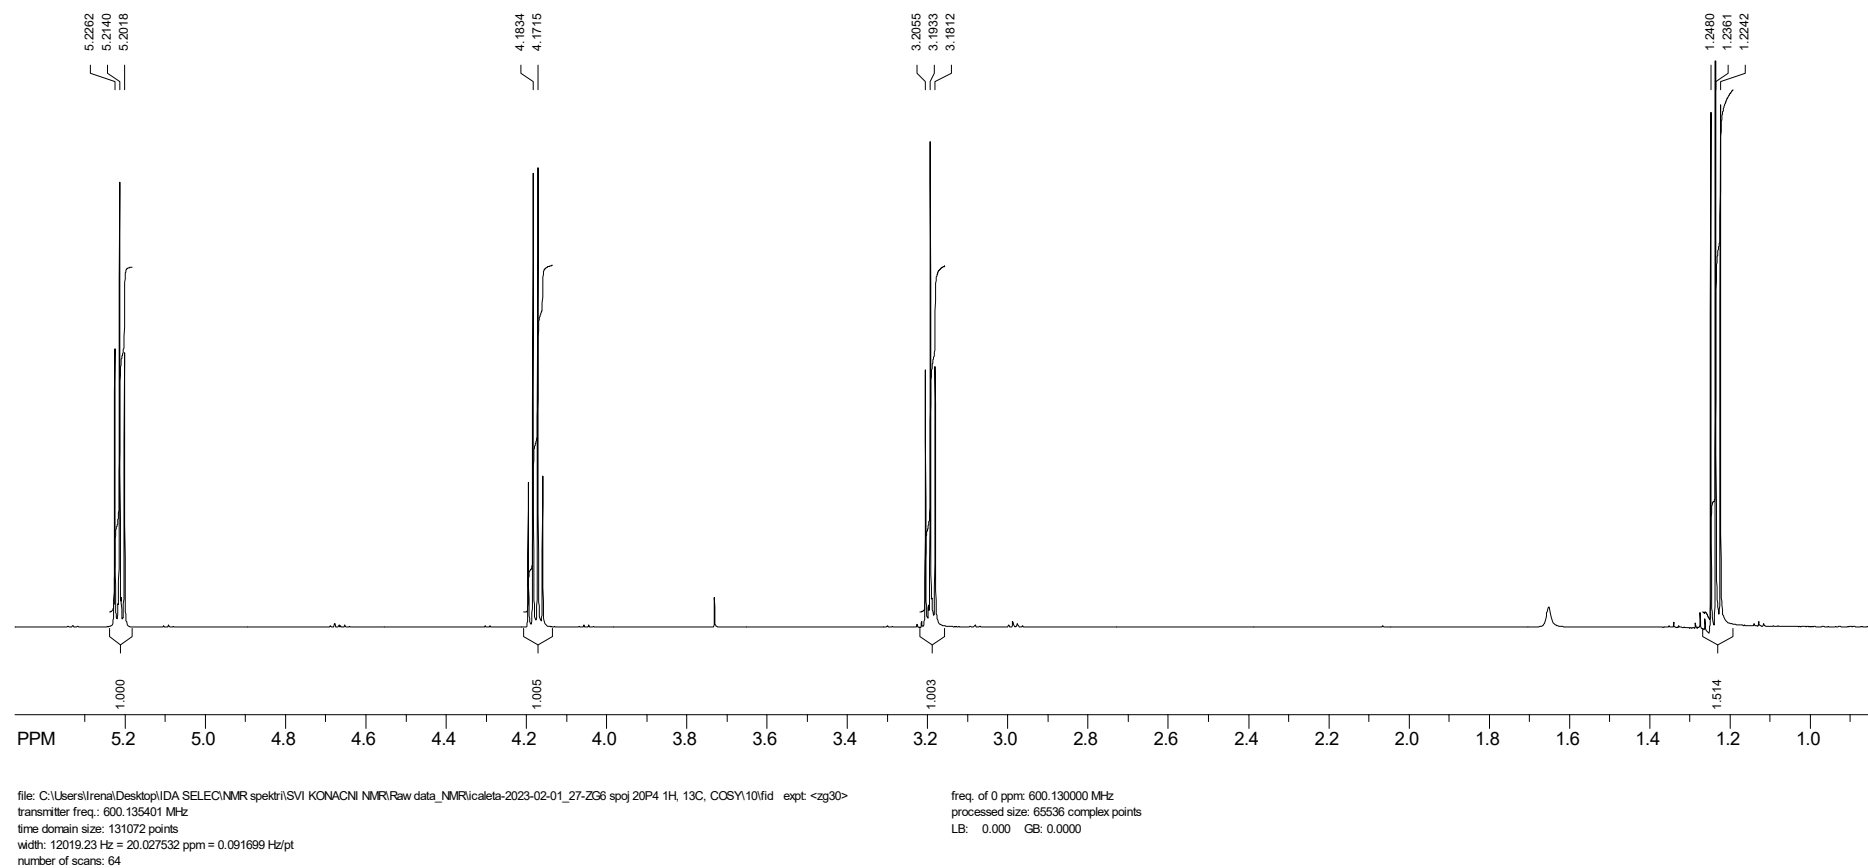

**Figure S11.** Aliphatic part of the  $^1\text{H}$  NMR spectrum ( $\text{CDCl}_3$ ) of compound **6**.



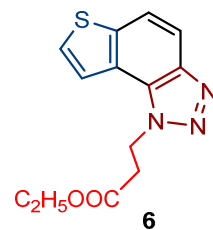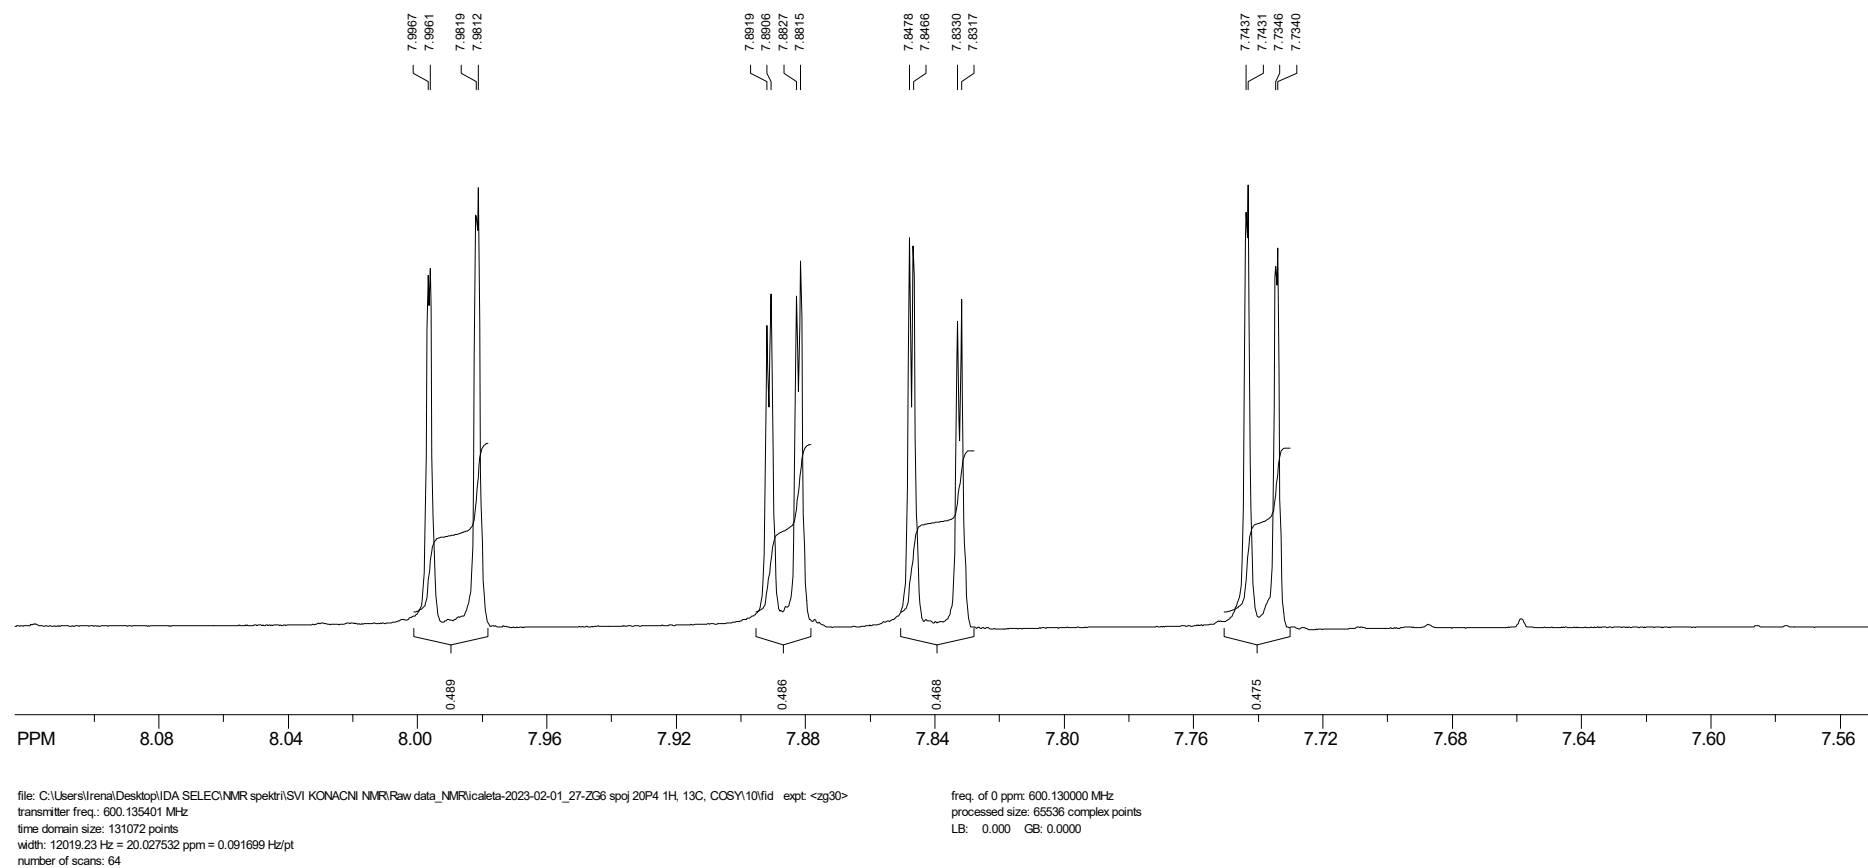

**Figure S12.** Aromatic part of the  $^1\text{H}$  NMR spectrum ( $\text{CDCl}_3$ ) of compound **6**.



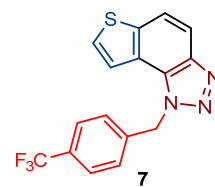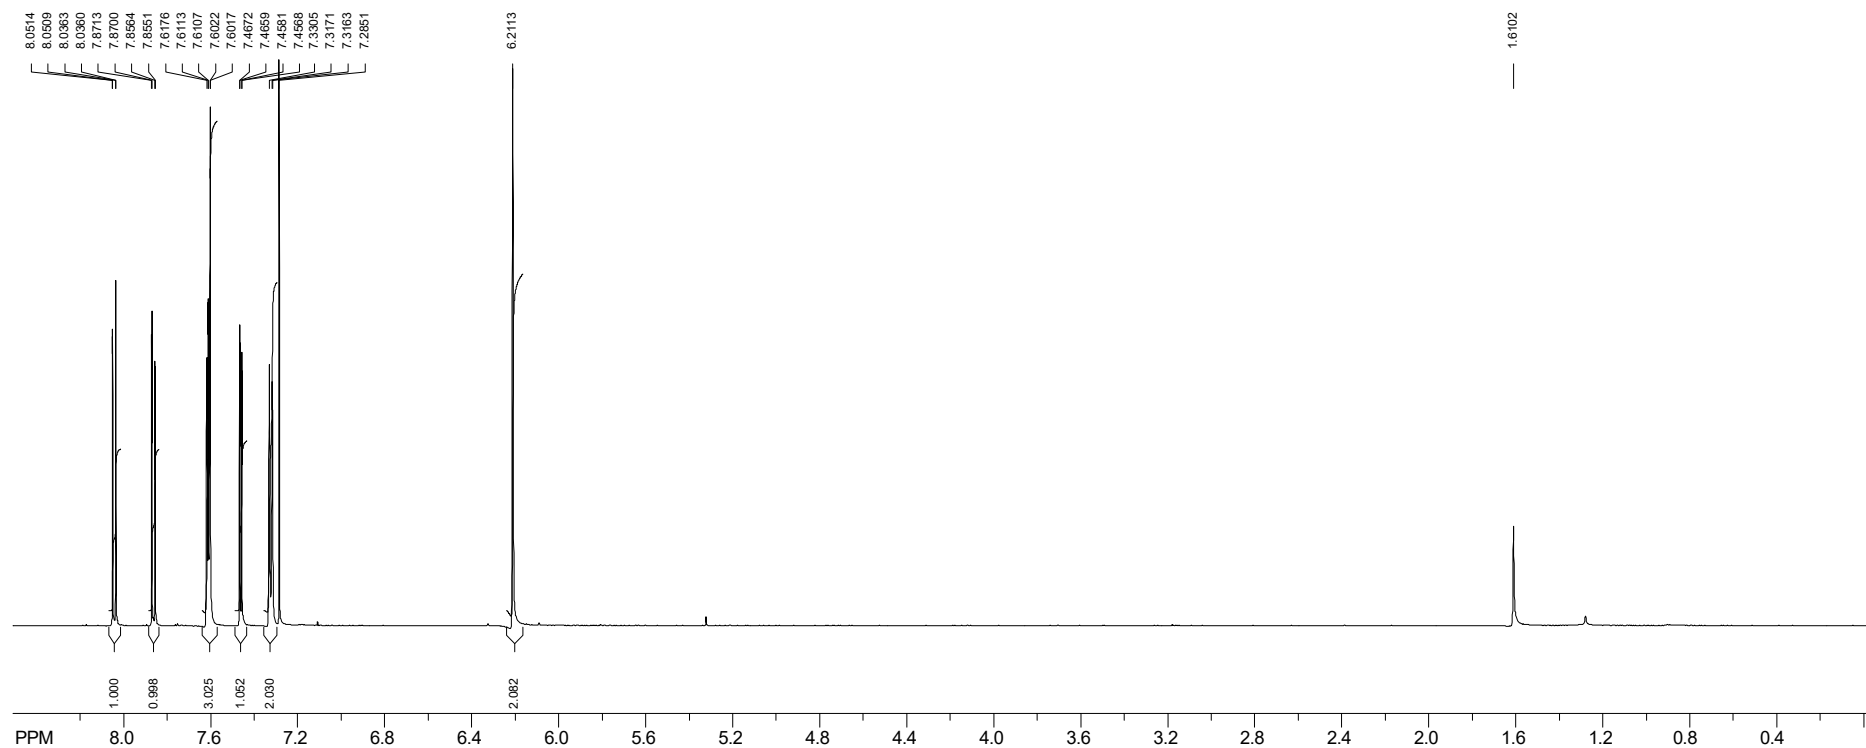

file: C:\Users\irena\Desktop\JMS II 2023\IDA SELEC\NMR spektri\SVI KONACNI NMR\NMR KONACNO ZA KORISTITI\Raw Data\_NMR\FID2172-048\10\fid exp: <zg30>  
 transmitter freq.: 600.135401 MHz  
 time domain size: 131072 points  
 width: 12019.23 Hz = 20.027532 ppm = 0.091699 Hz/pt  
 number of scans: 64

freq. of 0 ppm: 600.130000 MHz  
 processed size: 65536 complex points  
 LB: 0.000 GB: 0.0000

**Figure S14.**  $^1\text{H}$  NMR spectrum ( $\text{CDCl}_3$ ) of compound **7**.

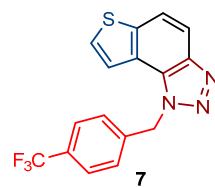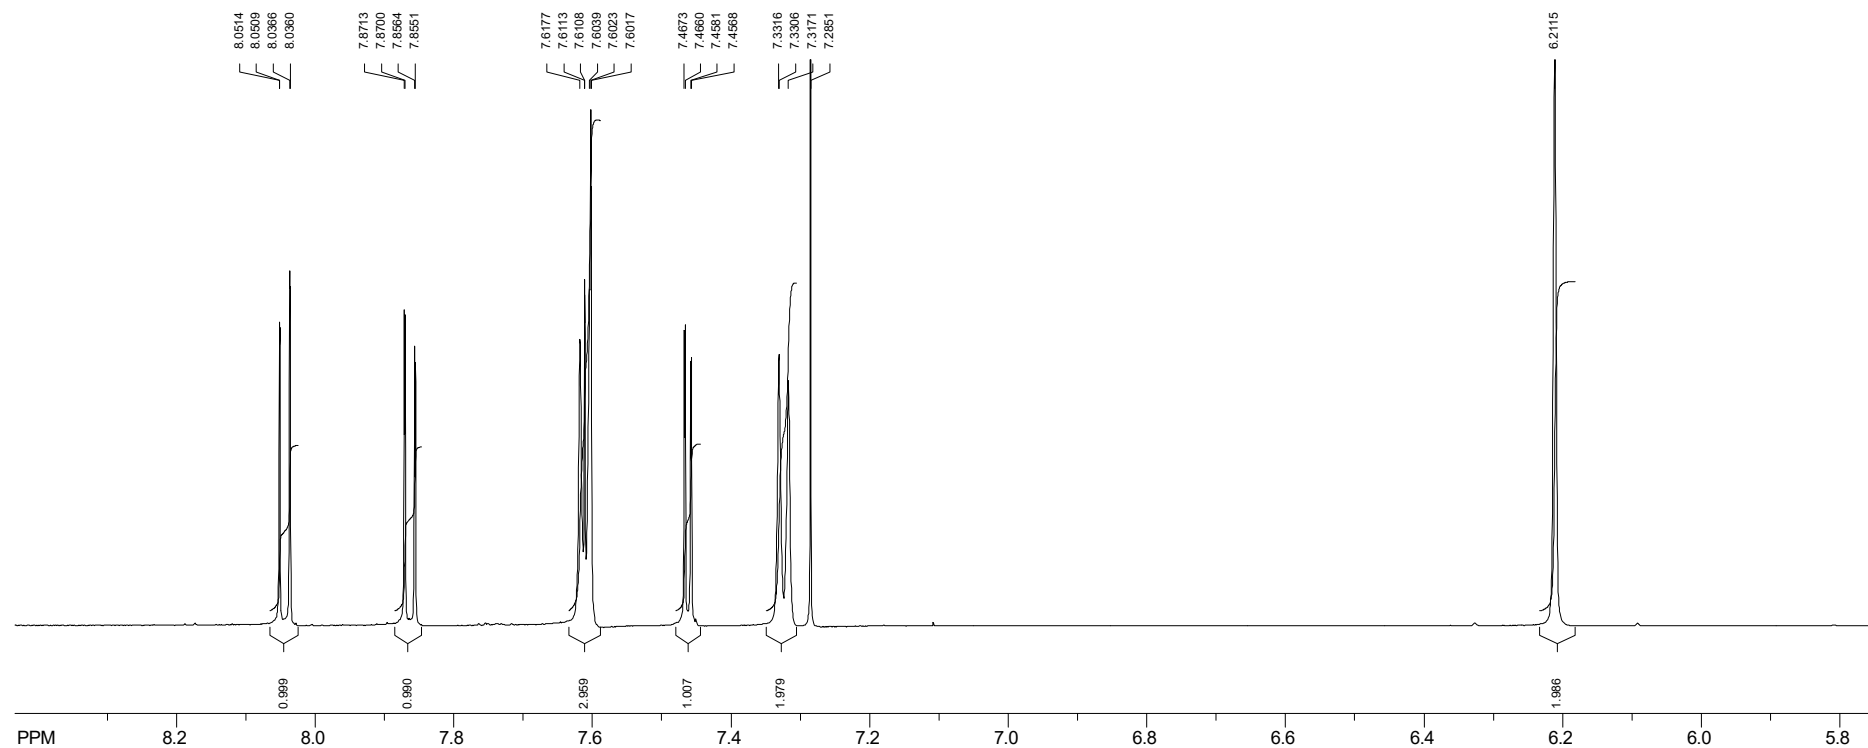

file: C:\Users\irena\Desktop\IDA SELEC\NMR spektri\SVI KONACNI NMR\Raw data\_NMR\icaleta-2023-02-01\_33-ZG6 spq 48P1 1H, 13C\10fid exp1 <zg30>  
 transmitter freq.: 600.135401 MHz  
 time domain size: 131072 points  
 width: 12019.23 Hz = 20.027532 ppm = 0.091699 Hz/pt  
 number of scans: 64

freq. of 0 ppm: 600.130000 MHz  
 processed size: 65536 complex points  
 LB: 0.000 GB: 0.0000

**Figure S15.** Part of the  $^1\text{H}$  NMR spectrum ( $\text{CDCl}_3$ ) of compound **7**.



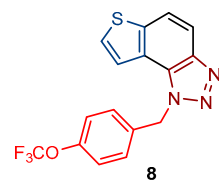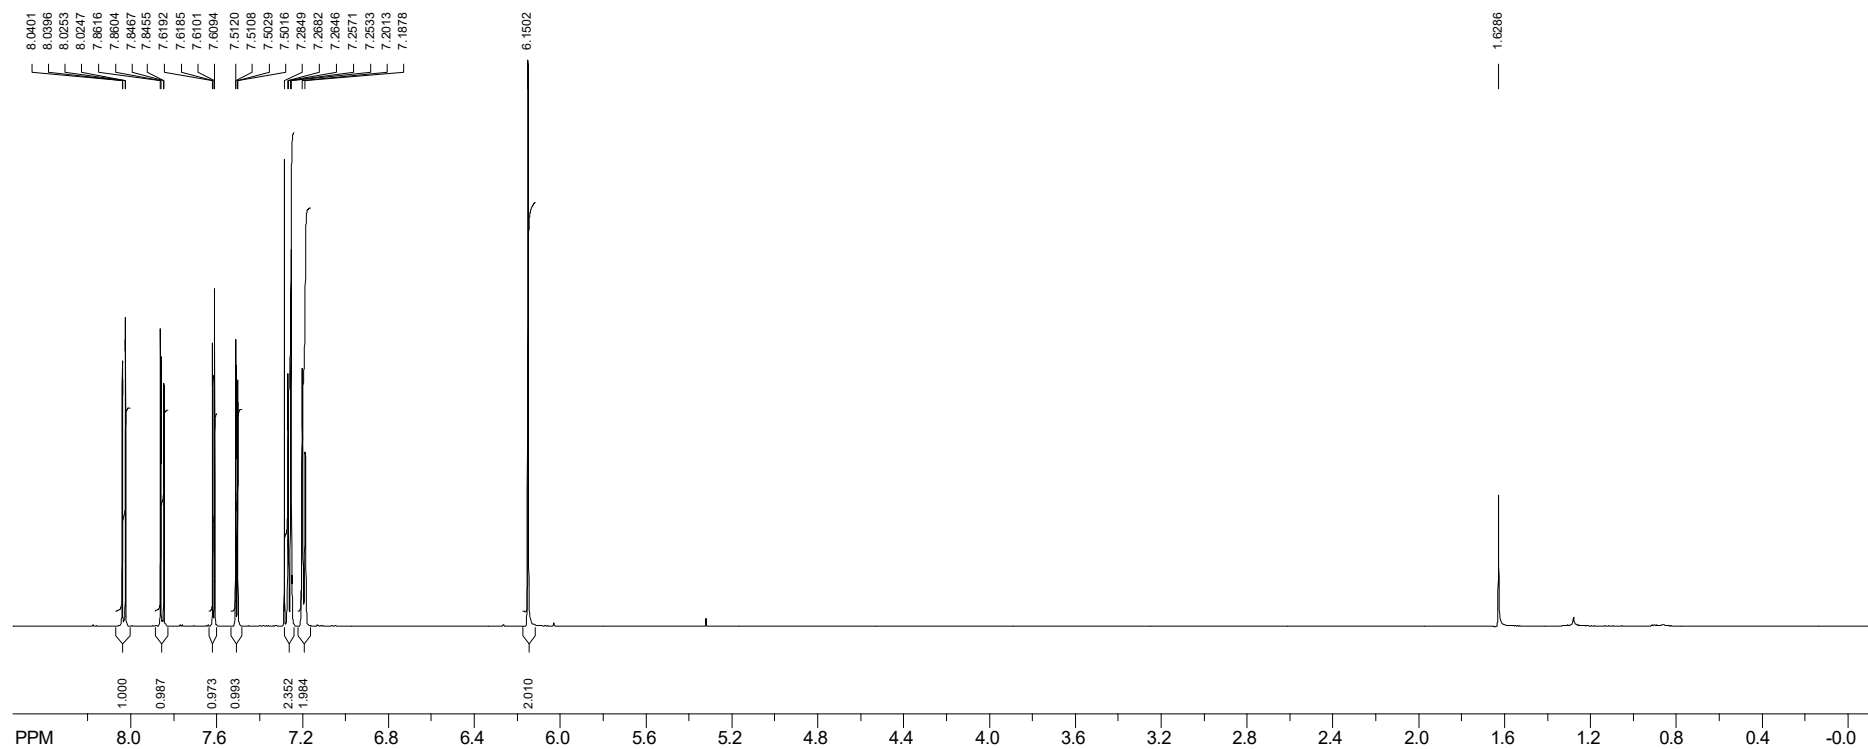

file: C:\Users\lrenal\Desktop\IUMS II 2023\IDA SELEC\NMR spektri\SVI KONACNI NMR\NMR KONACNO ZA KORISTITI\Raw Data\_NMR\FID2172-032\10\fid exp: <zg30>  
 transmitter freq.: 600.135401 MHz  
 time domain size: 131072 points  
 width: 12019.23 Hz = 20.027532 ppm = 0.091699 Hz/pt  
 number of scans: 64

freq. of 0 ppm: 600.130000 MHz  
 processed size: 65536 complex points  
 LB: 0.000 GB: 0.0000

**Figure S17.**  $^1\text{H}$  NMR spectrum ( $\text{CDCl}_3$ ) of compound **8**.

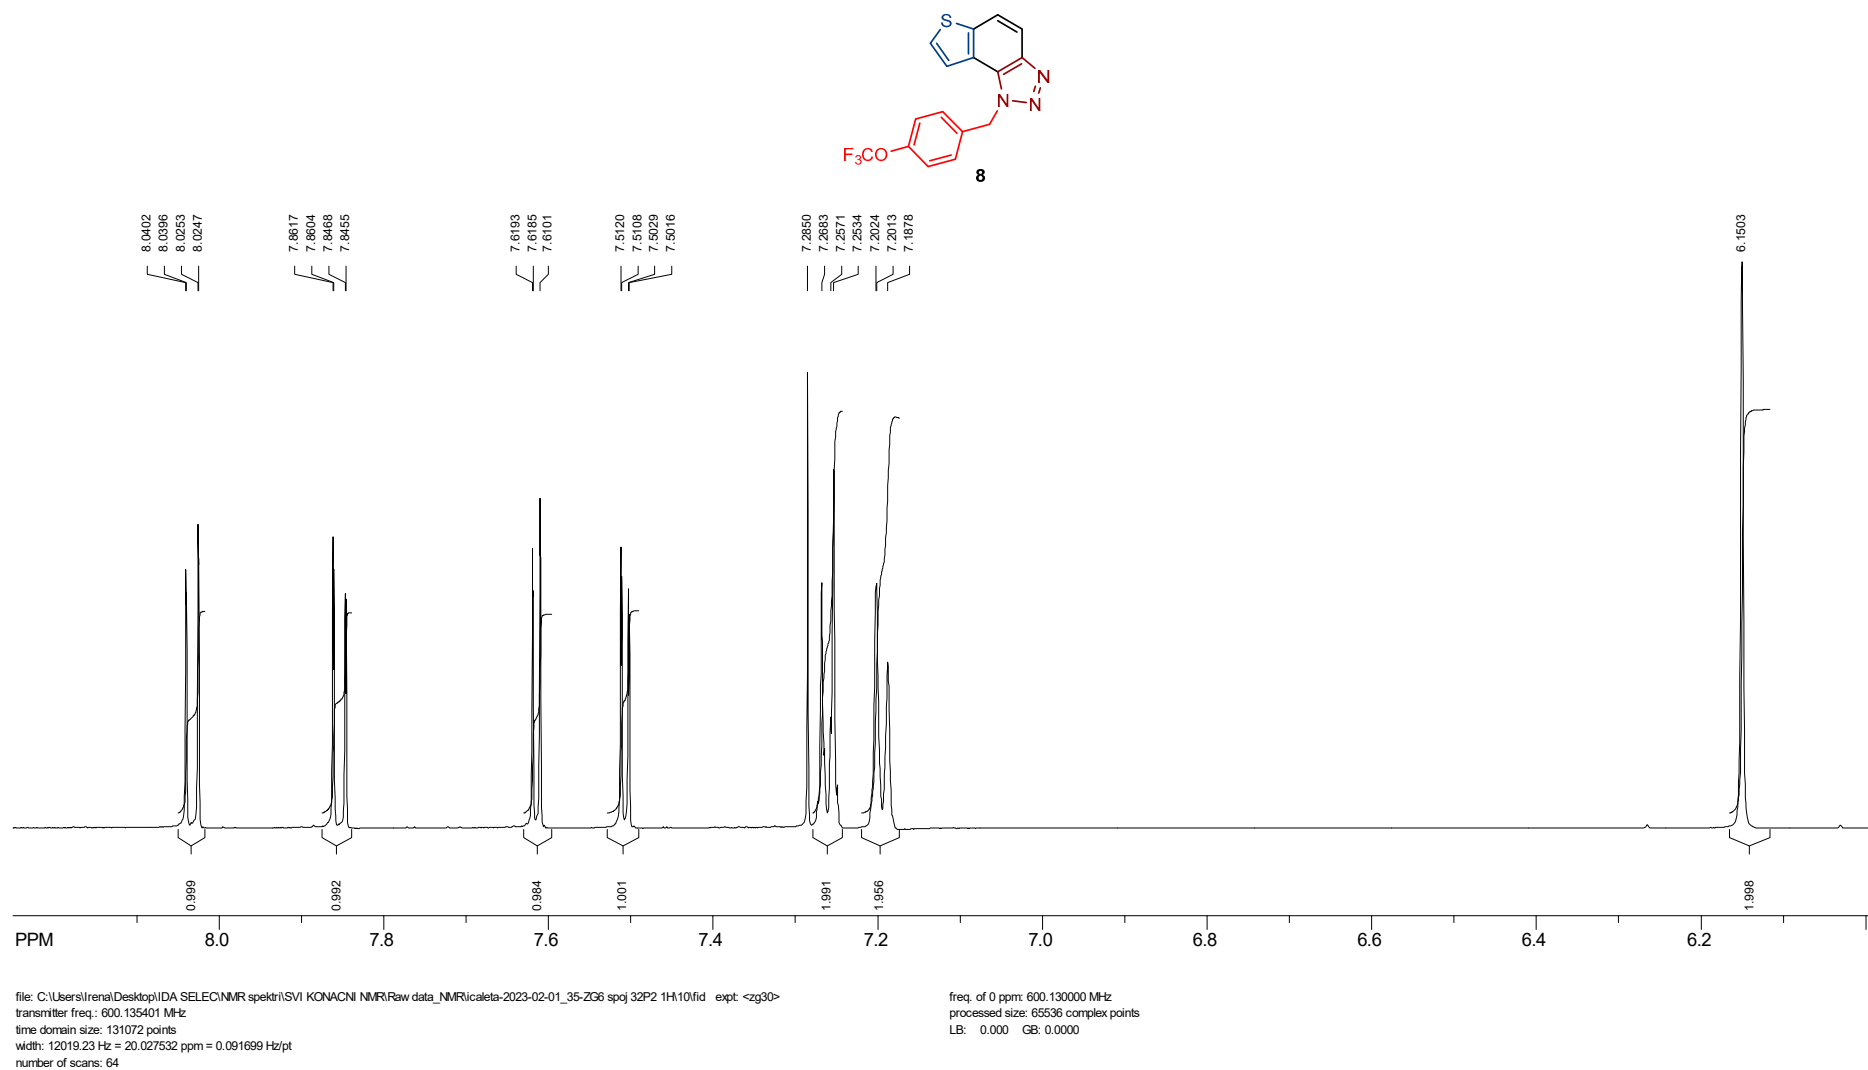

**Figure S18.** Part of the  $^1\text{H}$  NMR spectrum ( $\text{CDCl}_3$ ) of compound **8**.

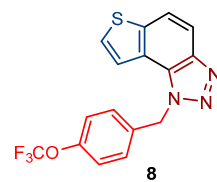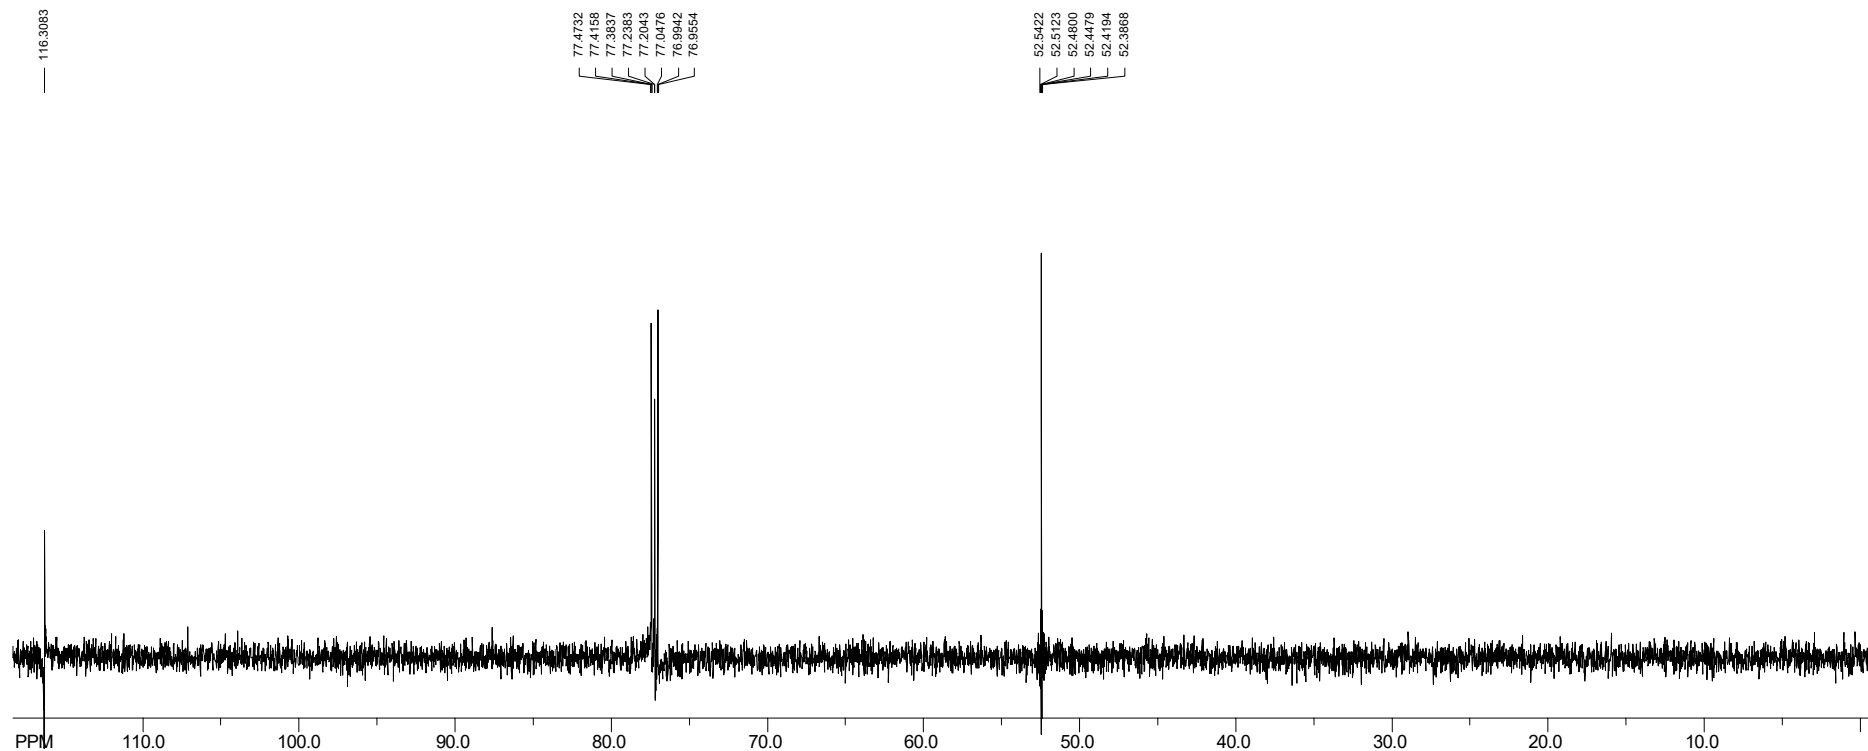

file: C:\Users\irena\Desktop\JMS II 2023\IDA SELEC\NMR spektri\SVI KONACNI NMR\NMR KONACNO ZA KORISTITI\Raw Data\_NMR\FID2172-032\111.fid expt: <deftgpcsp.2>  
transmitter freq.: 150.921671 MHz  
time domain size: 16384 points  
width: 39062.50 Hz = 258.826315 ppm = 2.384186 Hz/pt  
number of scans: 1000

freq. of 0 ppm: 150.902782 MHz  
processed size: 16384 complex points  
LB: 0.000 GB: 0.0000



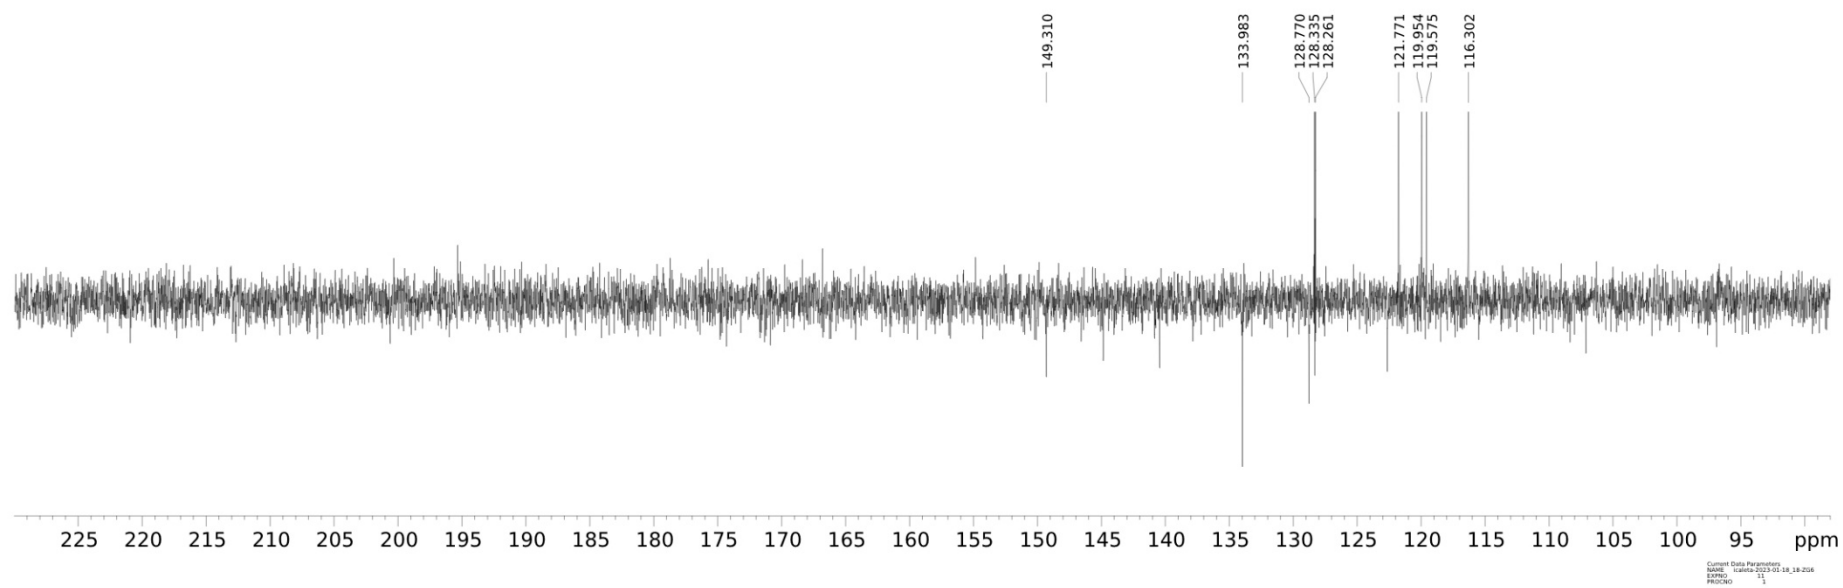

**Figure S19.** <sup>13</sup>C NMR spectrum (CDCl<sub>3</sub>) of compound **8**.

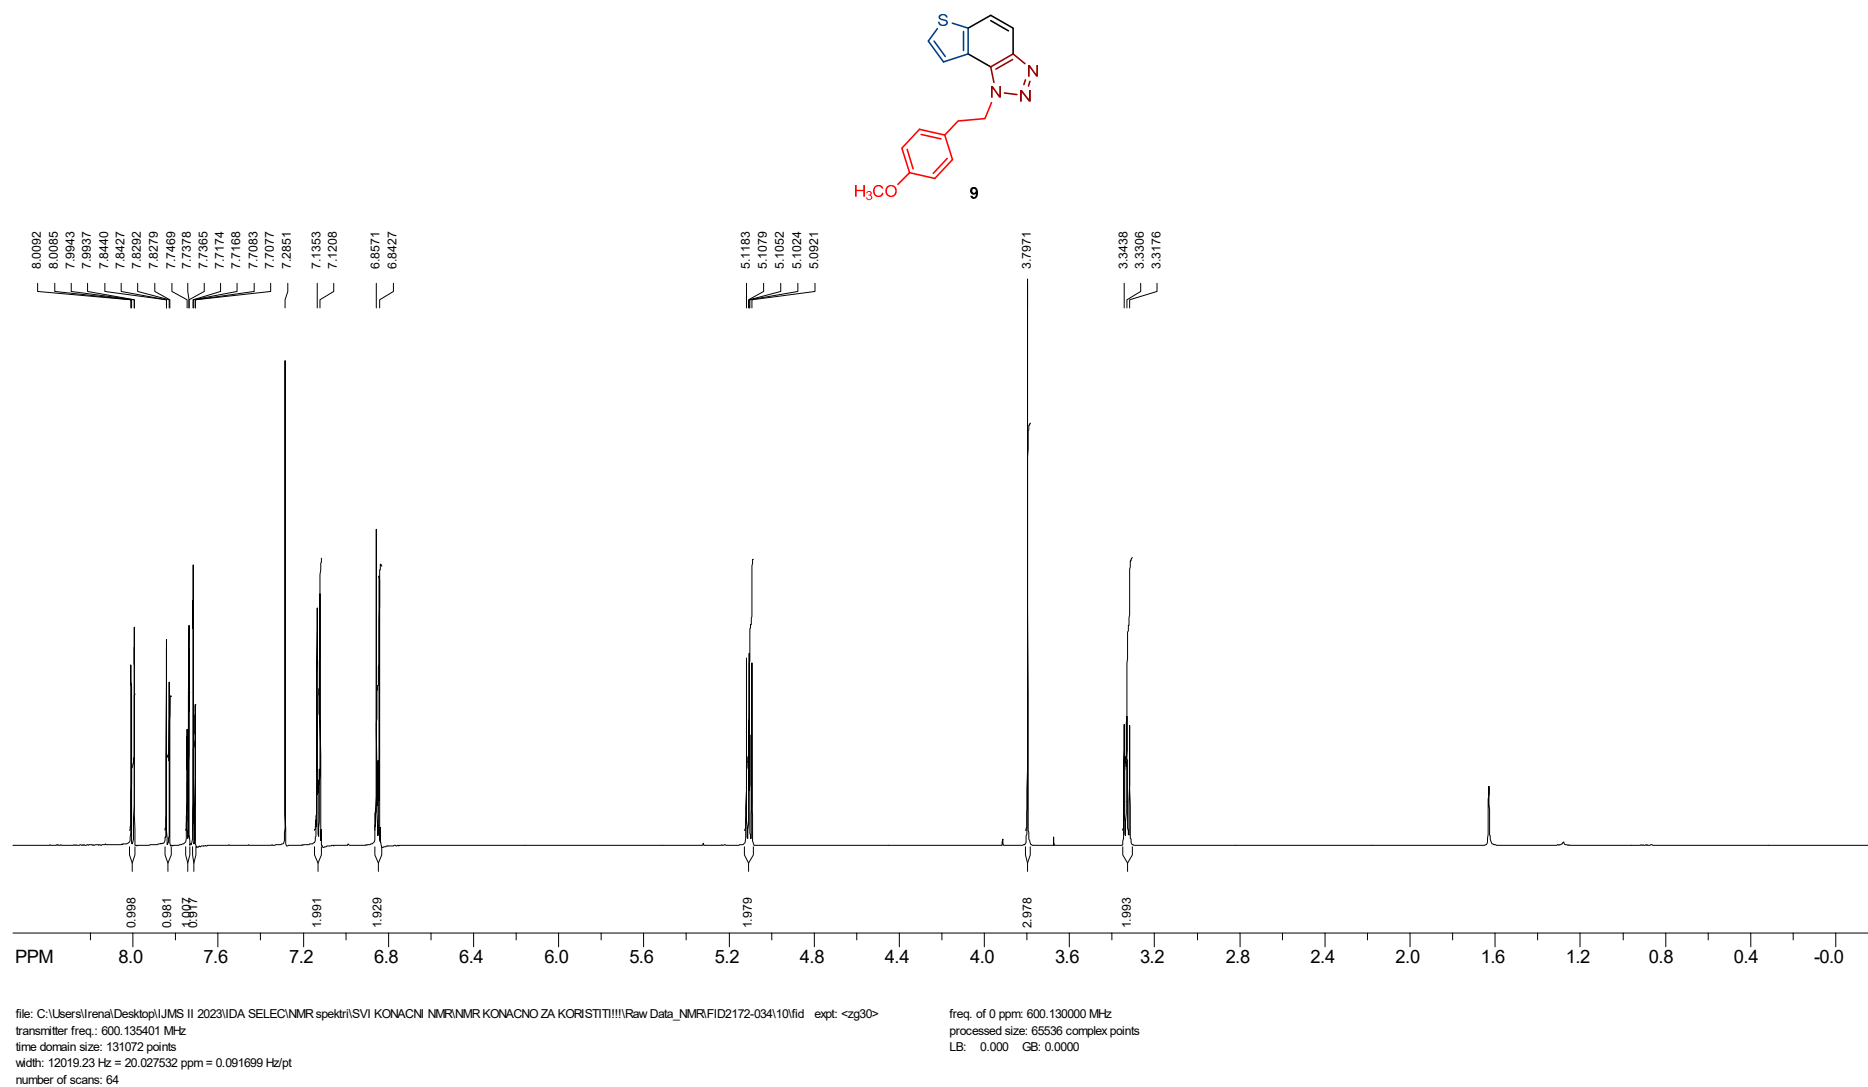

**Figure S20.**  $^1\text{H}$  NMR spectrum ( $\text{CDCl}_3$ ) of compound **9**.

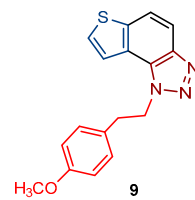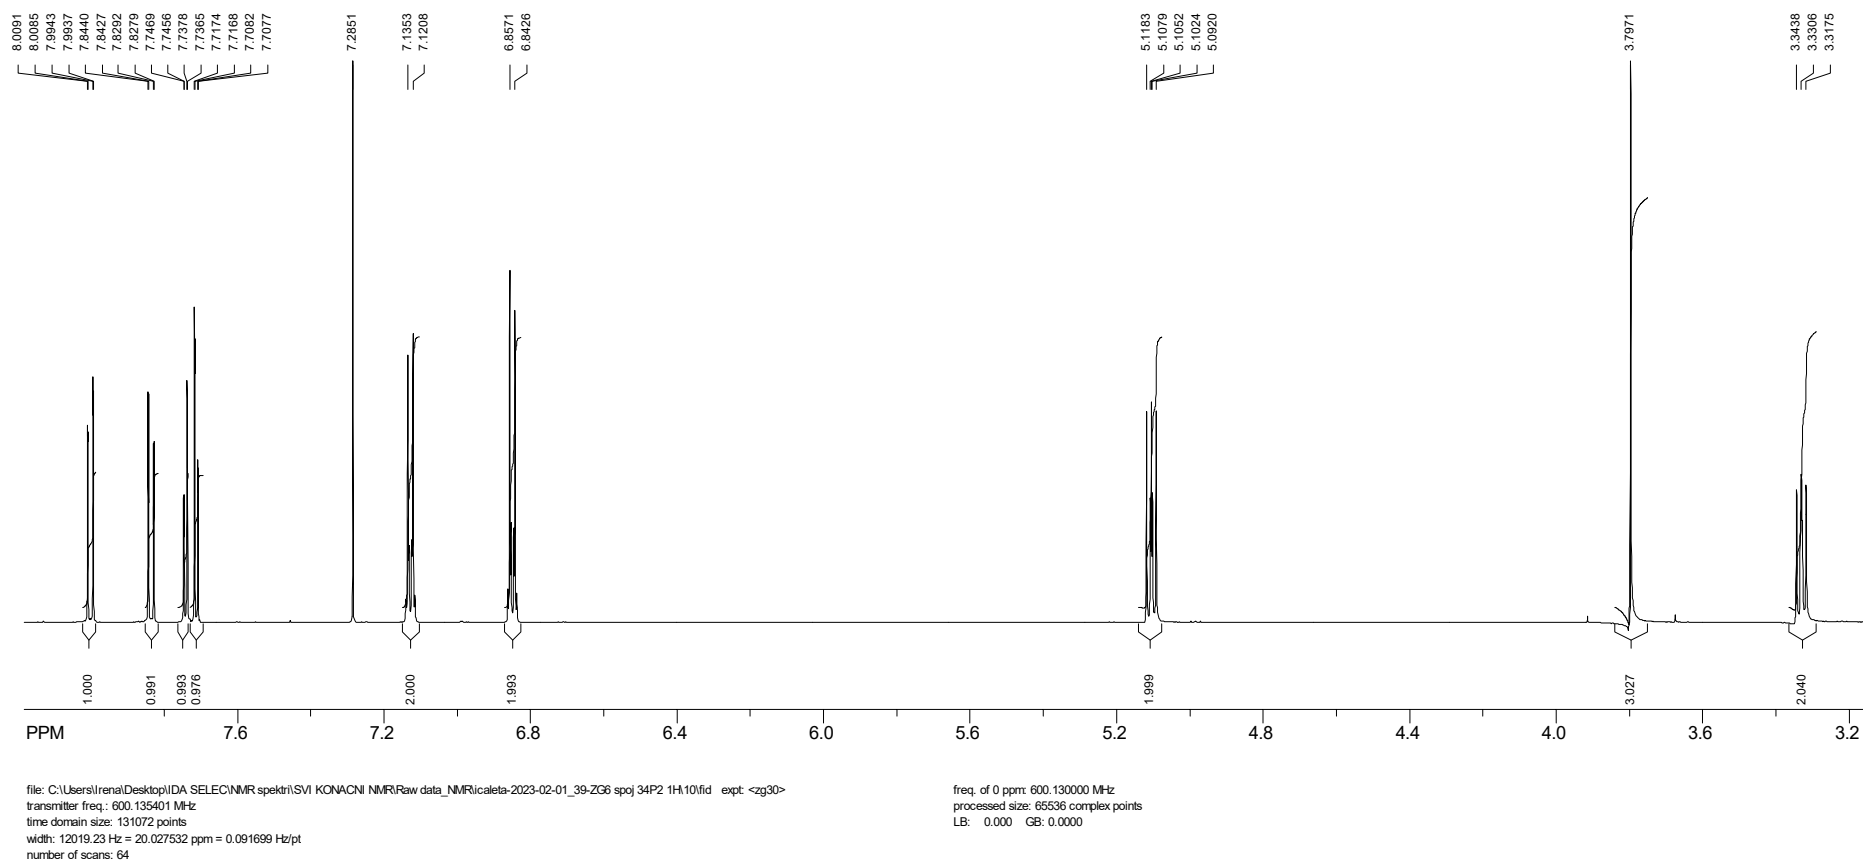

**Figure S21.** Part of the  $^1\text{H}$  NMR spectrum ( $\text{CDCl}_3$ ) of compound **9**.



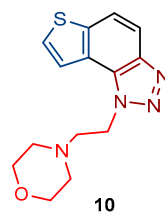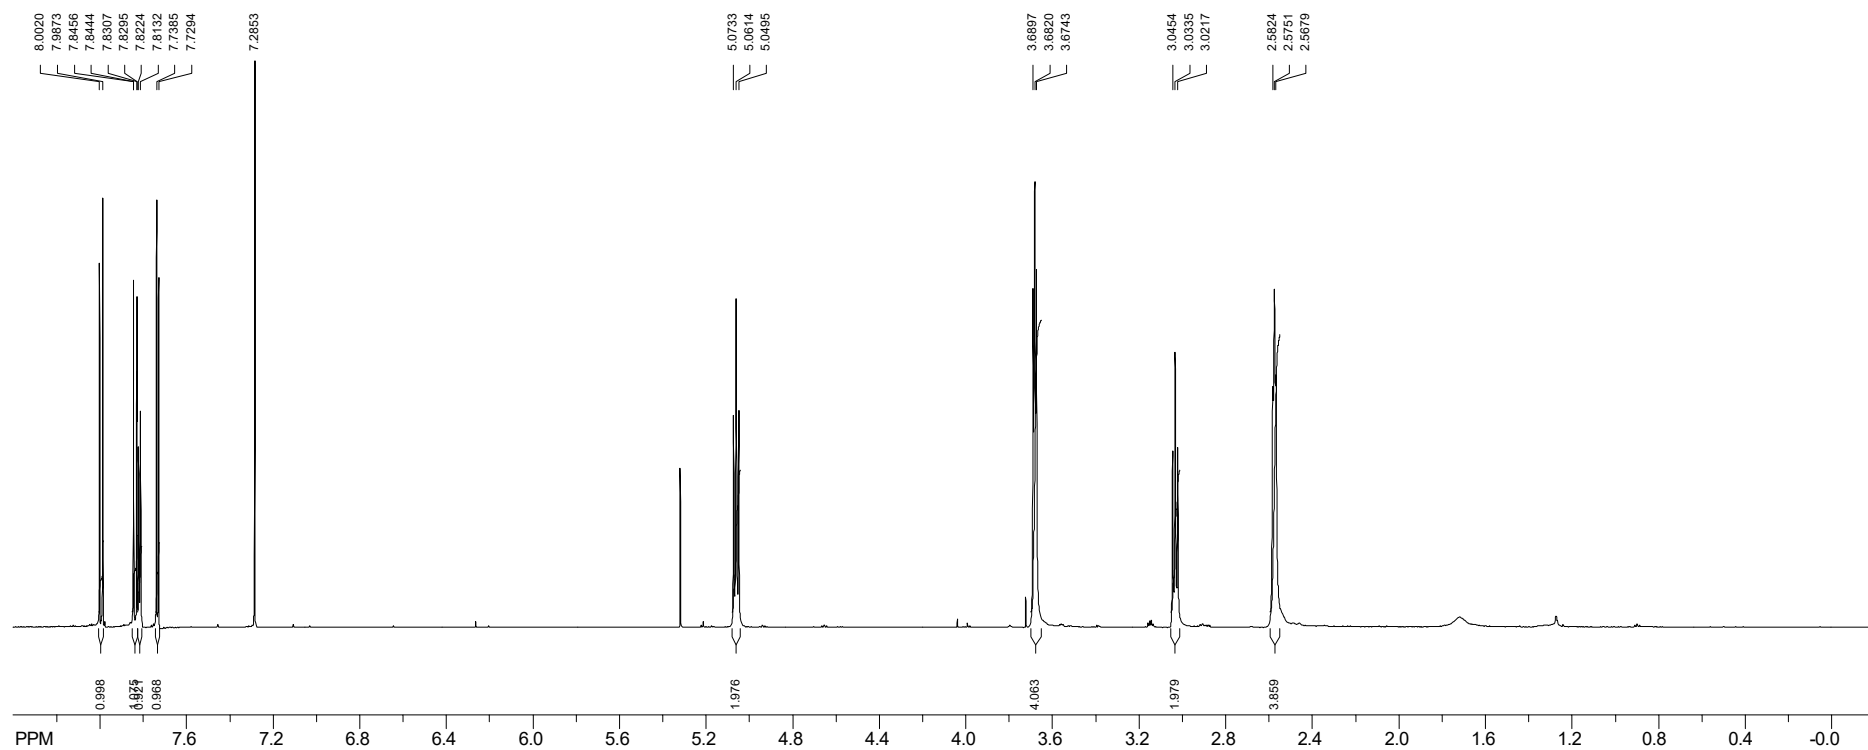

file: C:\Users\Irena\Desktop\UMS II 2023\IDA SELEC\NMR spektri\SVI KONACNI NMR\NMR KONACNO ZA KORISTITI\Raw Data\_NMR\FID2172-047\10\fid exp: <zg30>  
 transmitter freq.: 600.135401 MHz  
 time domain size: 131072 points  
 width: 12019.23 Hz = 20.027532 ppm = 0.091699 Hz/pt  
 number of scans: 64

freq. of 0 ppm: 600.130000 MHz  
 processed size: 65536 complex points  
 LB: 0.000 GB: 0.0000

**Figure S23.**  $^1\text{H}$  NMR spectrum ( $\text{CDCl}_3$ ) of compound **10**.

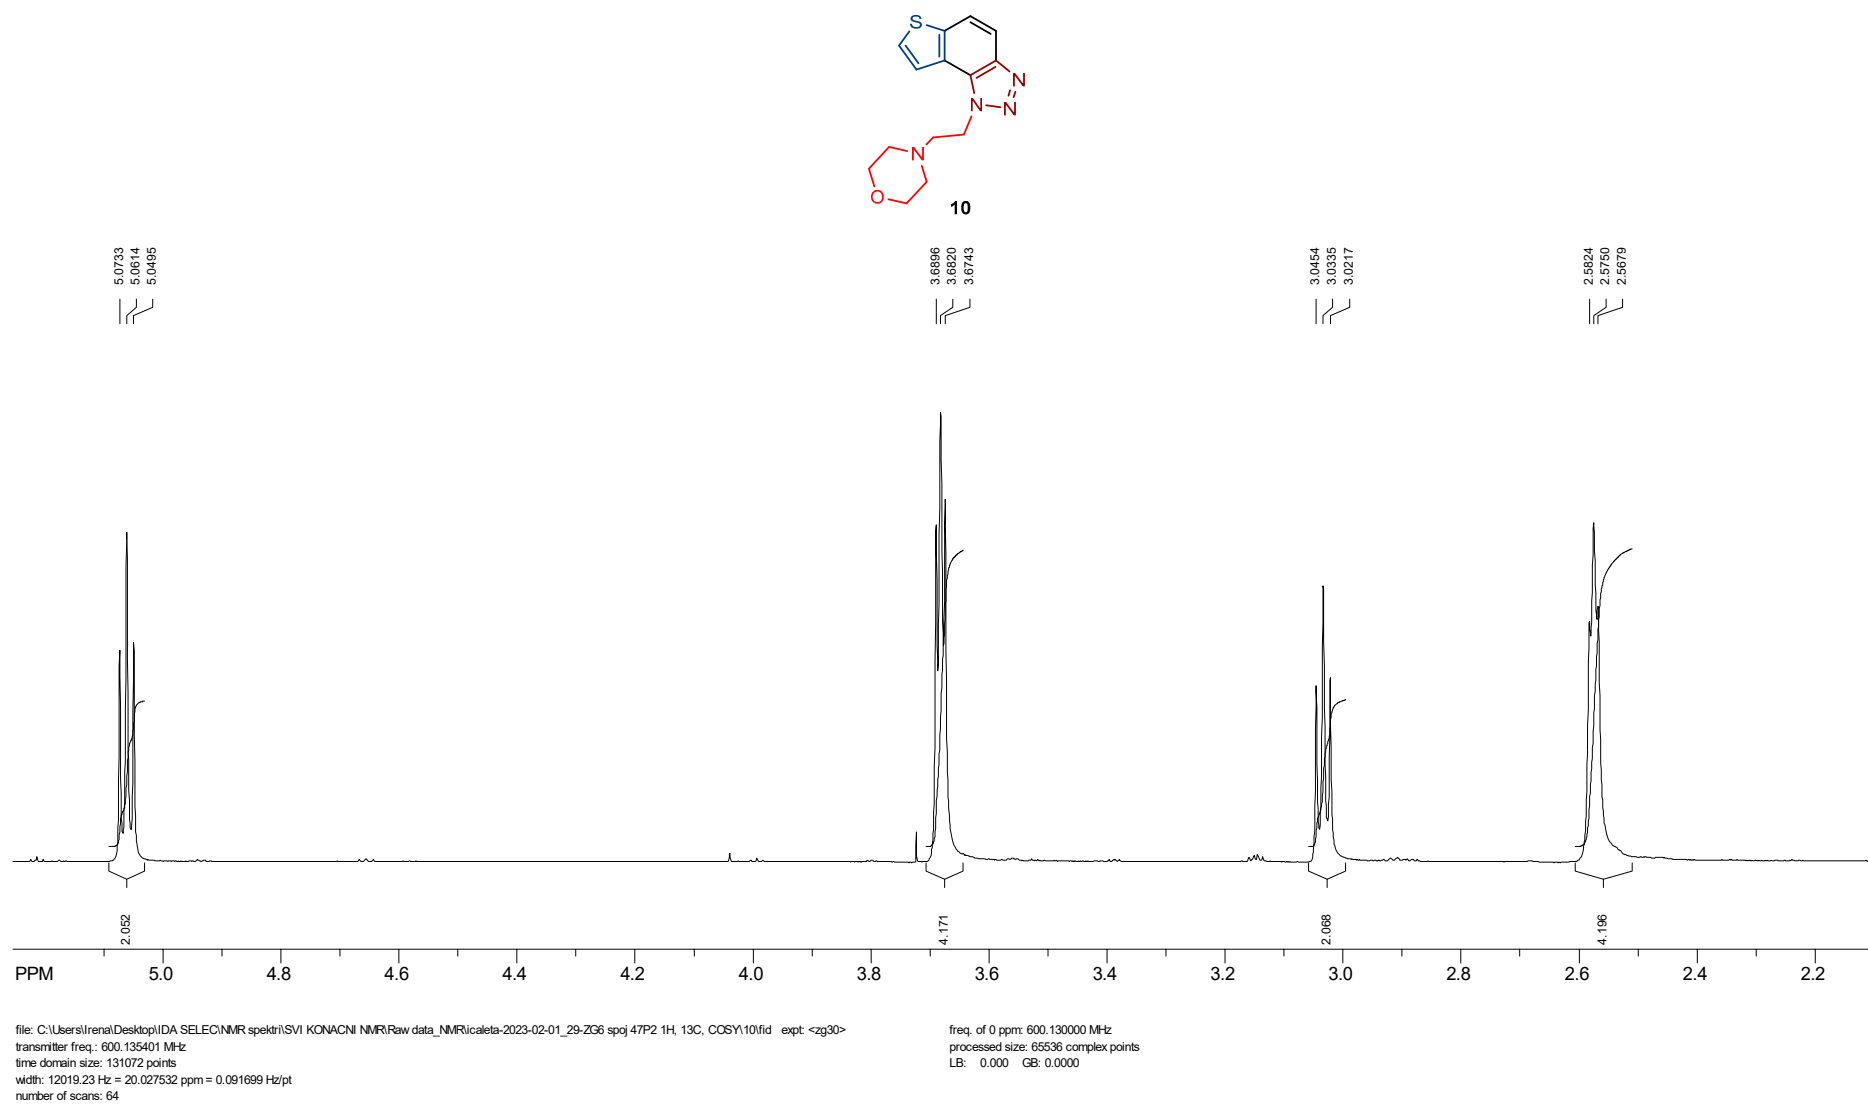

**Figure S24.** Aliphatic part of the <sup>1</sup>H NMR spectrum (CDCl<sub>3</sub>) of compound **10**.

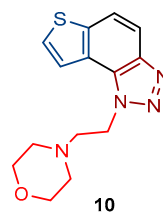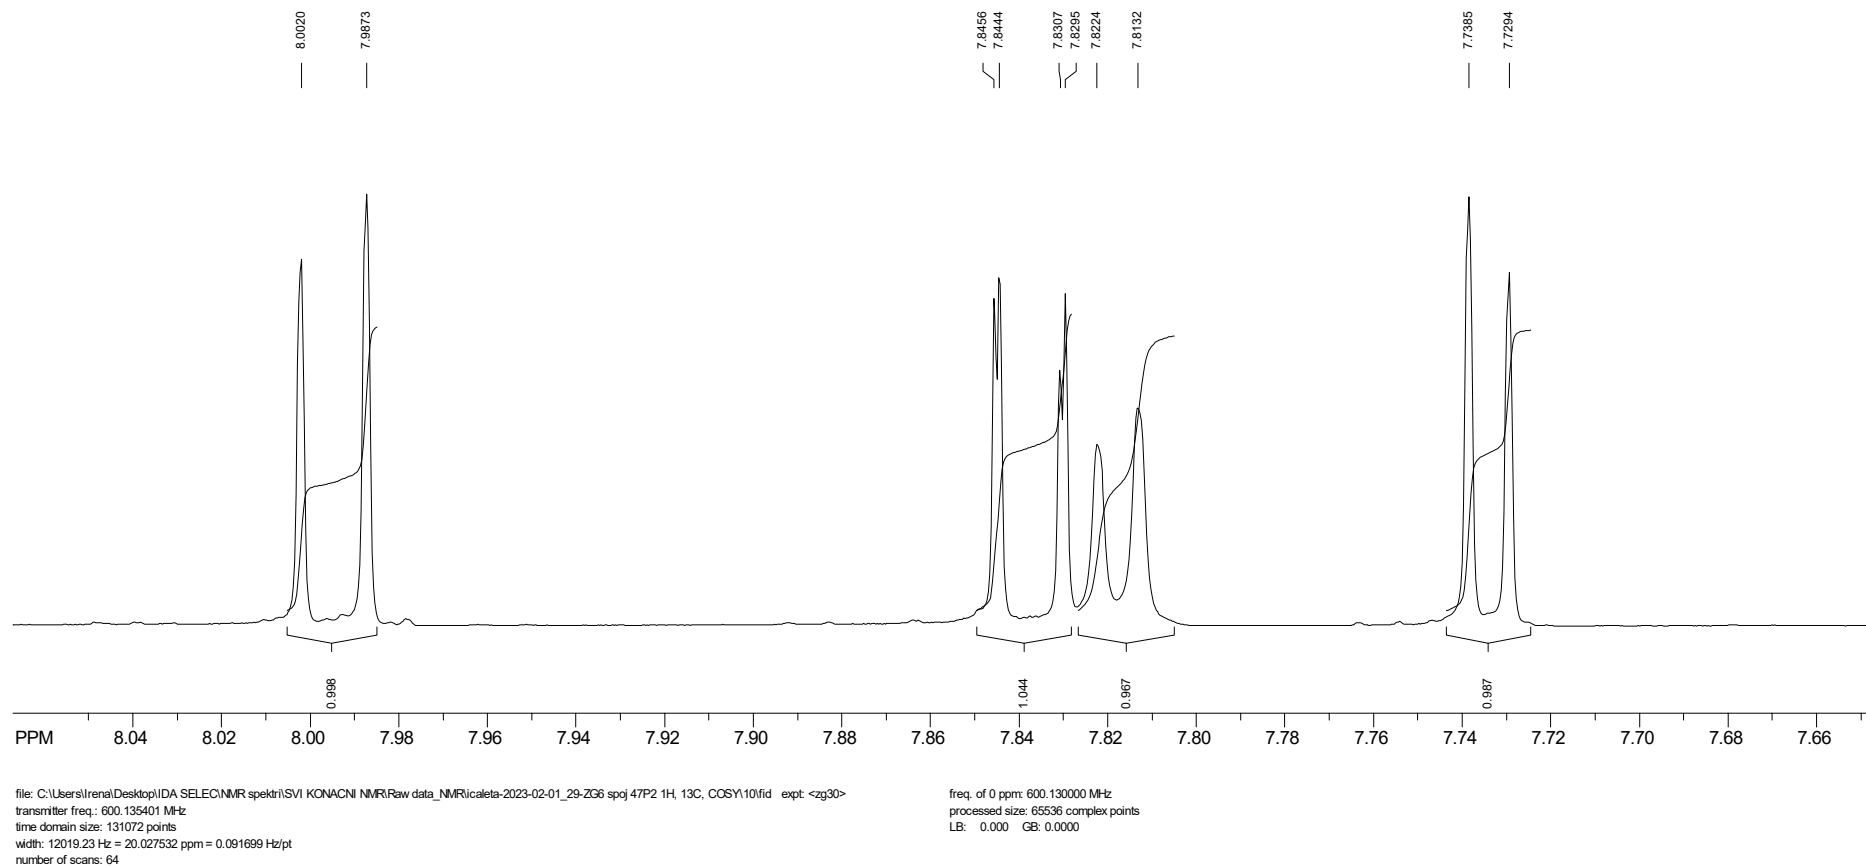

**Figure S25.** Aromatic part of the  $^1\text{H}$  NMR spectrum ( $\text{CDCl}_3$ ) of compound **10**.

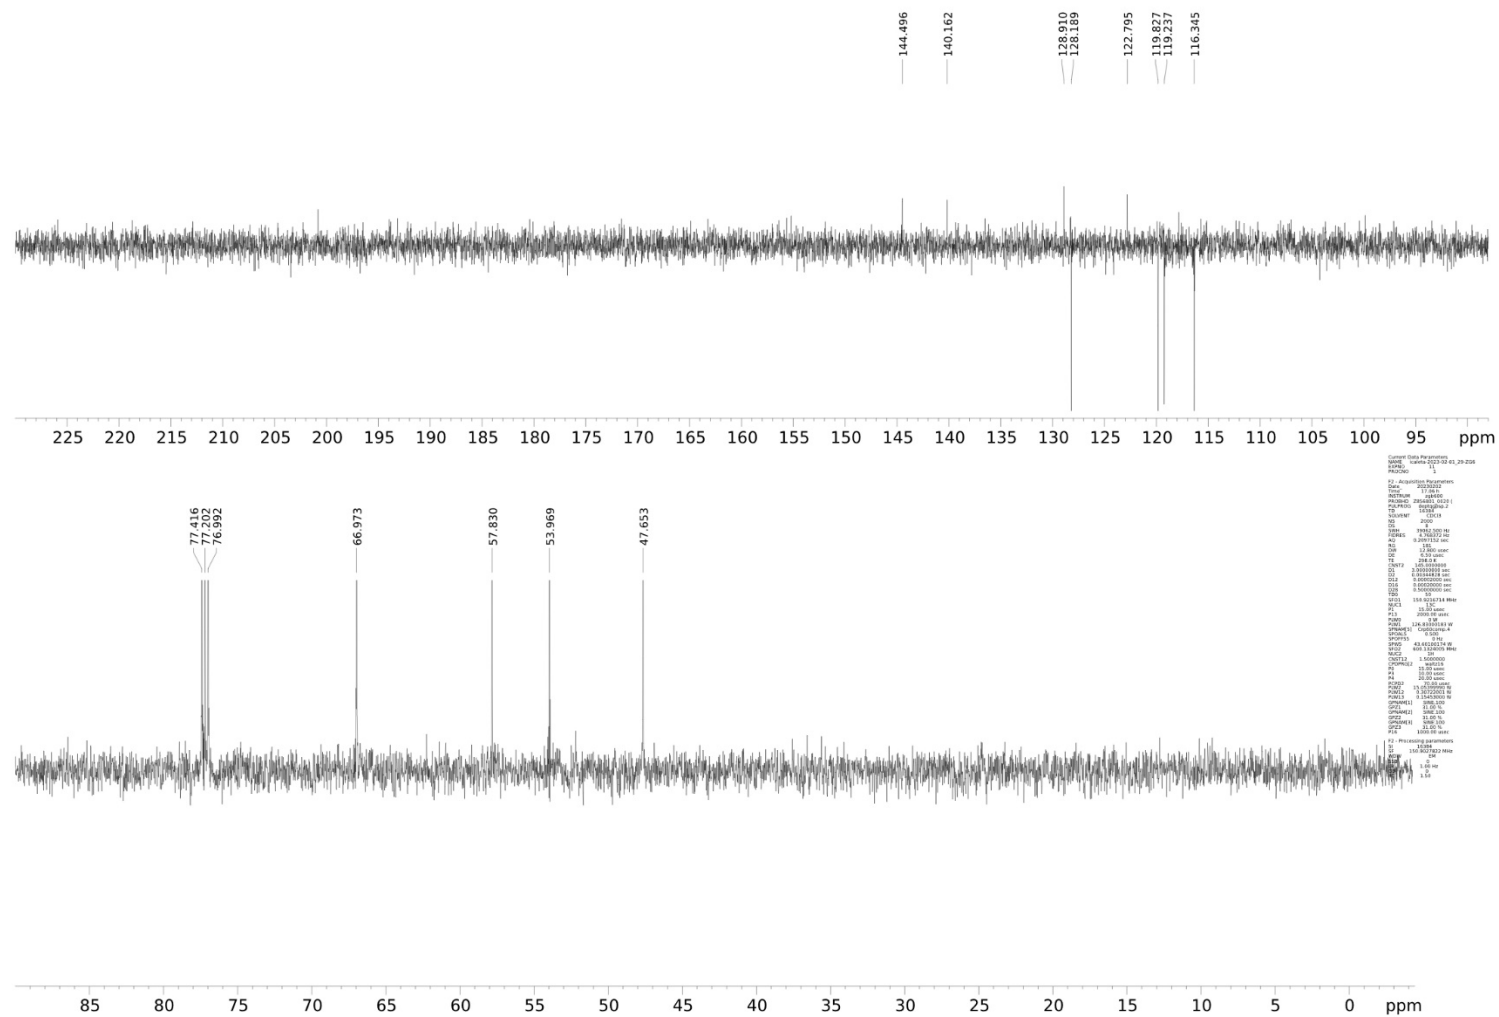

**Figure S26.**  $^{13}\text{C}$  NMR spectrum ( $\text{CDCl}_3$ ) of compound **10**.



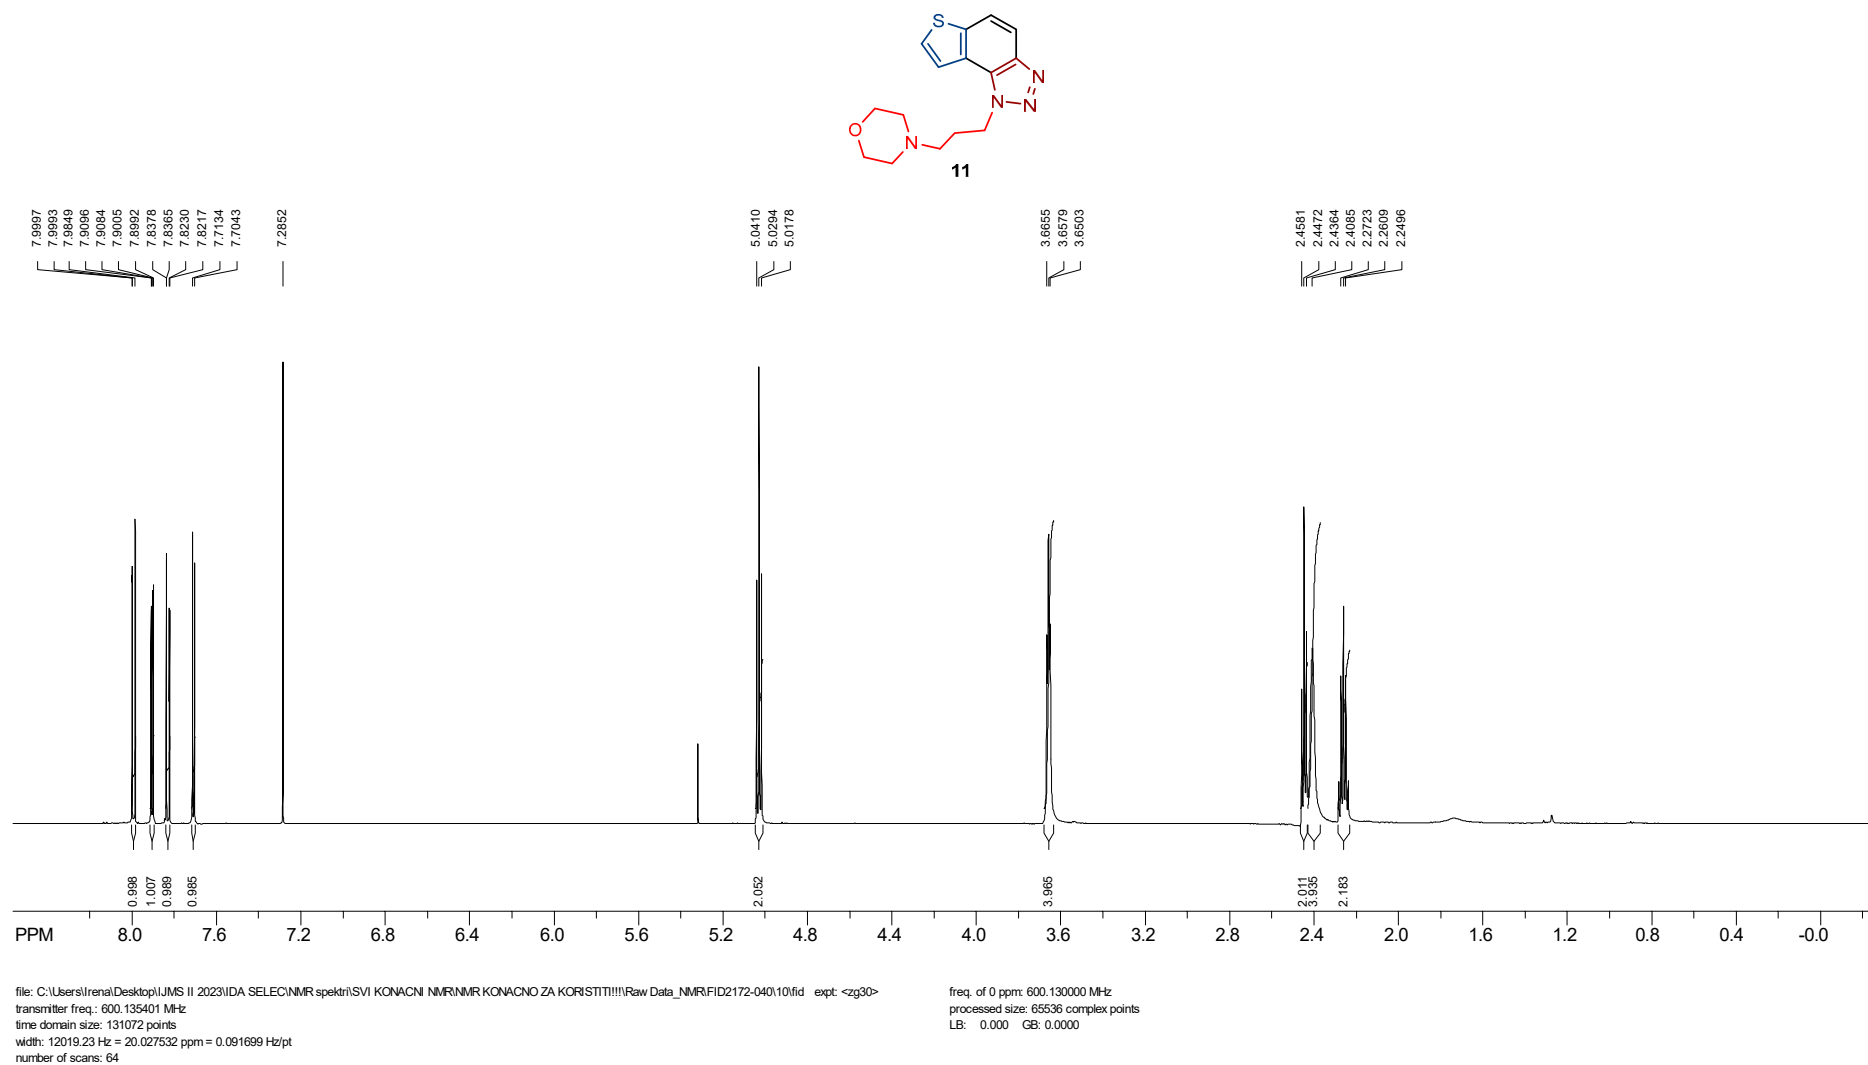

**Figure S27.**  $^1\text{H}$  NMR spectrum ( $\text{CDCl}_3$ ) of compound **11**.

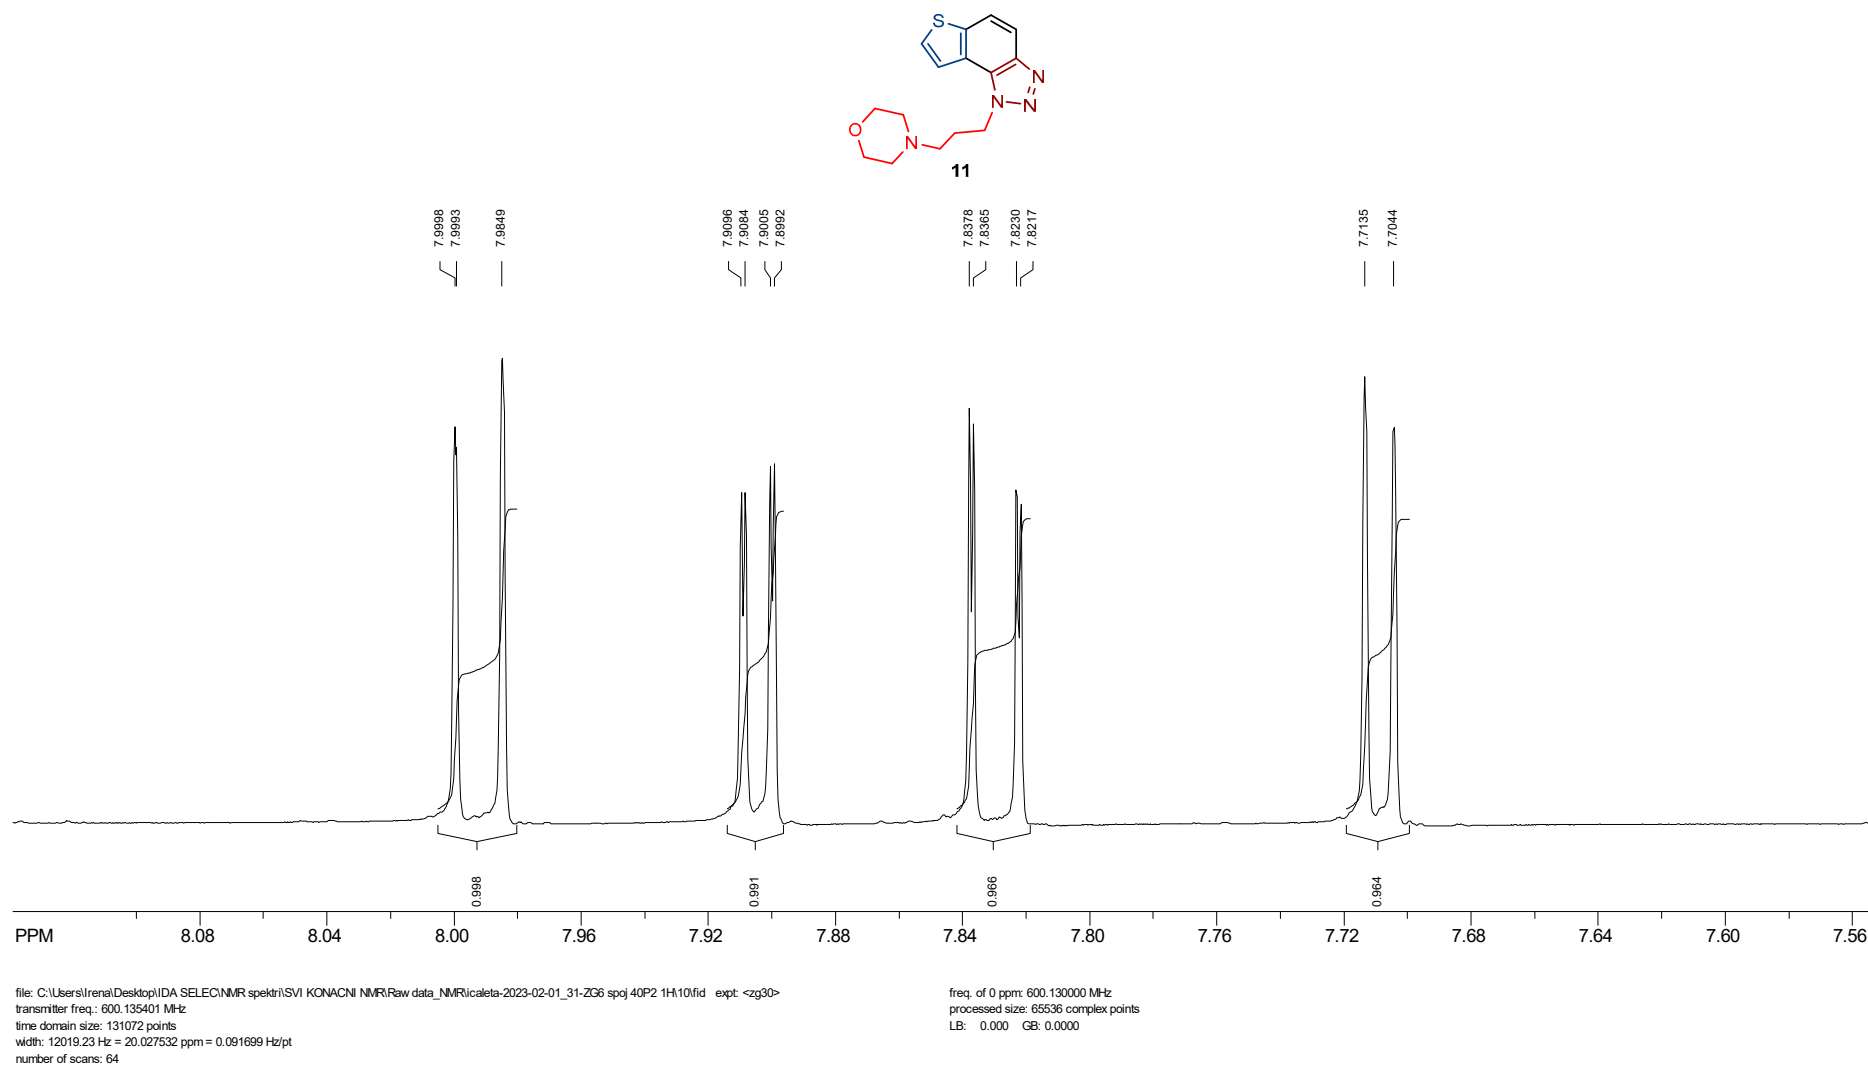

**Figure S28.** Aromatic part of the  $^1\text{H}$  NMR spectrum ( $\text{CDCl}_3$ ) of compound **11**.

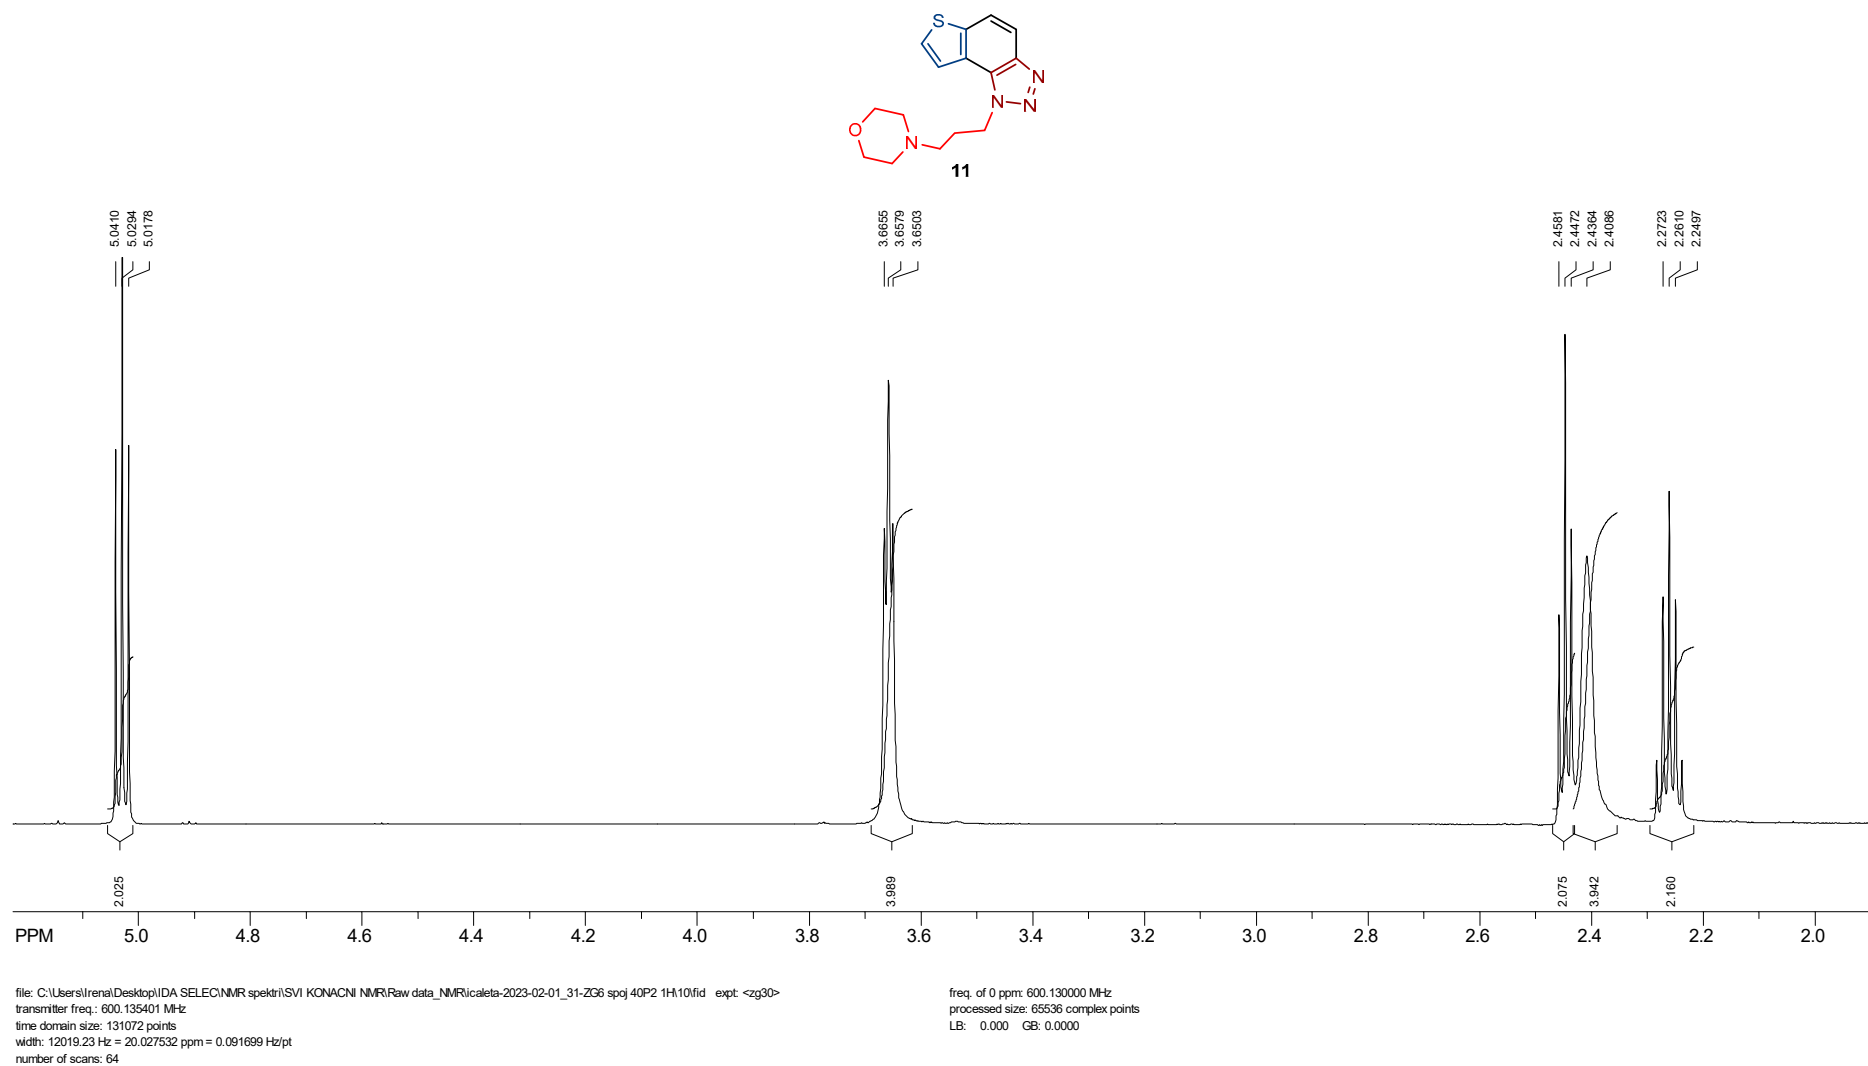

**Figure S29.** Aliphatic part of the  $^1\text{H}$  NMR spectrum ( $\text{CDCl}_3$ ) of compound **11**.



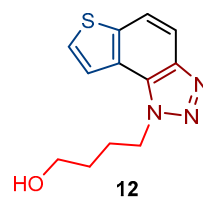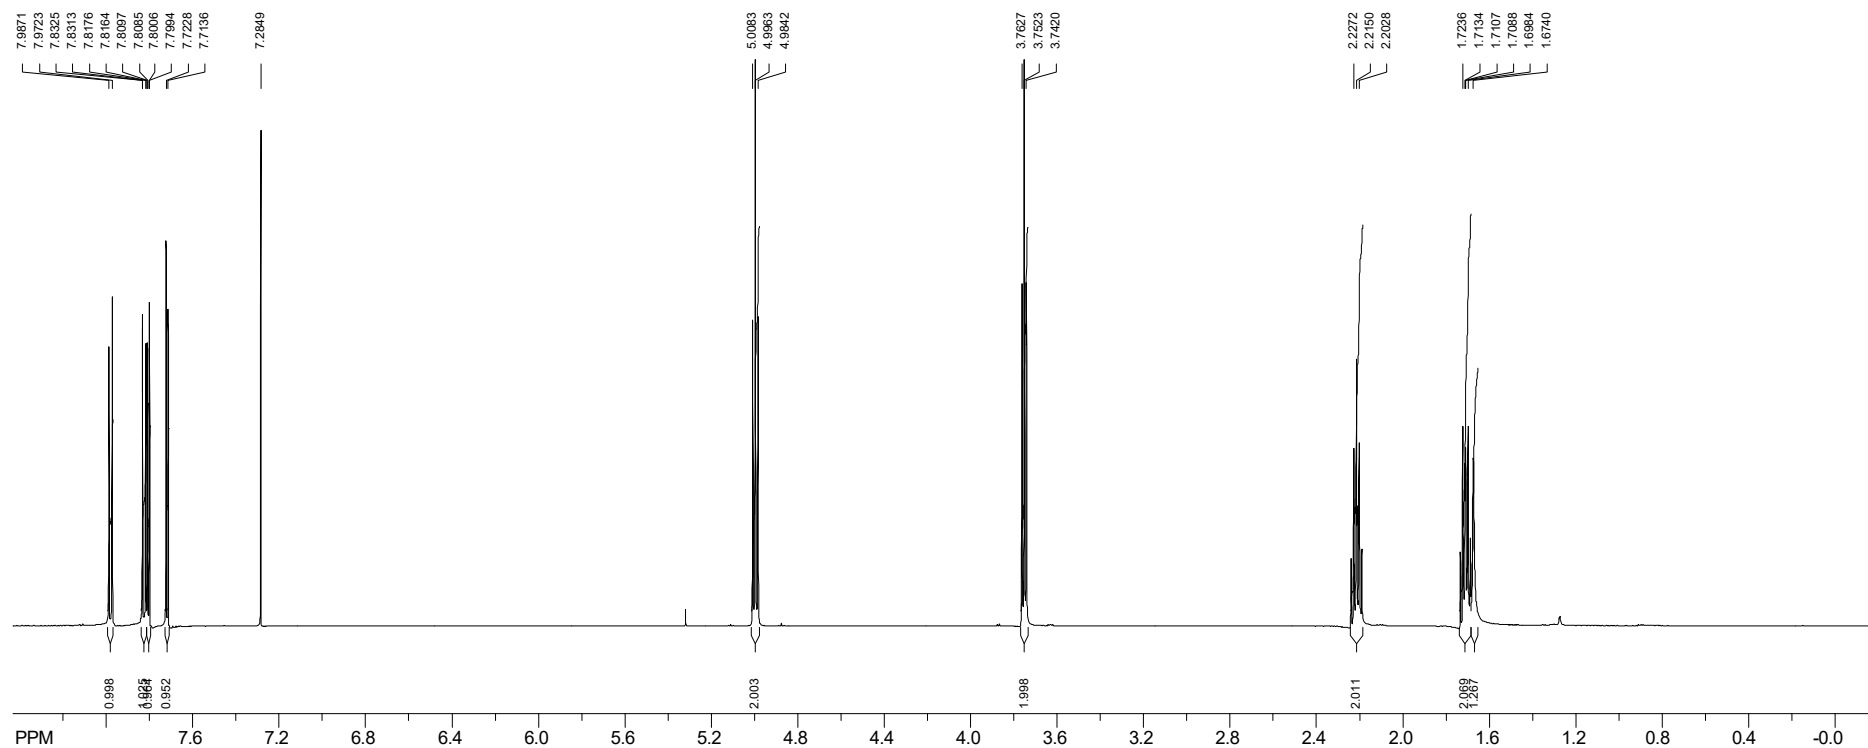

file: C:\Users\irena\Desktop\JMS II 2023\IDA SELEC\NMR spektri\SVI KONACNI NMR\NMR KONACNO ZA KORISTITI\Raw Data\_NMR\FID2172-046\10\fid exp: <zg30>  
 transmitter freq.: 600.135401 MHz  
 time domain size: 131072 points  
 width: 12019.23 Hz = 20.027532 ppm = 0.091699 Hz/pt  
 number of scans: 64

freq. of 0 ppm: 600.130000 MHz  
 processed size: 65536 complex points  
 LB: 0.000 GB: 0.0000

**Figure S31.**  $^1\text{H}$  NMR spectrum ( $\text{CDCl}_3$ ) of compound **12**.

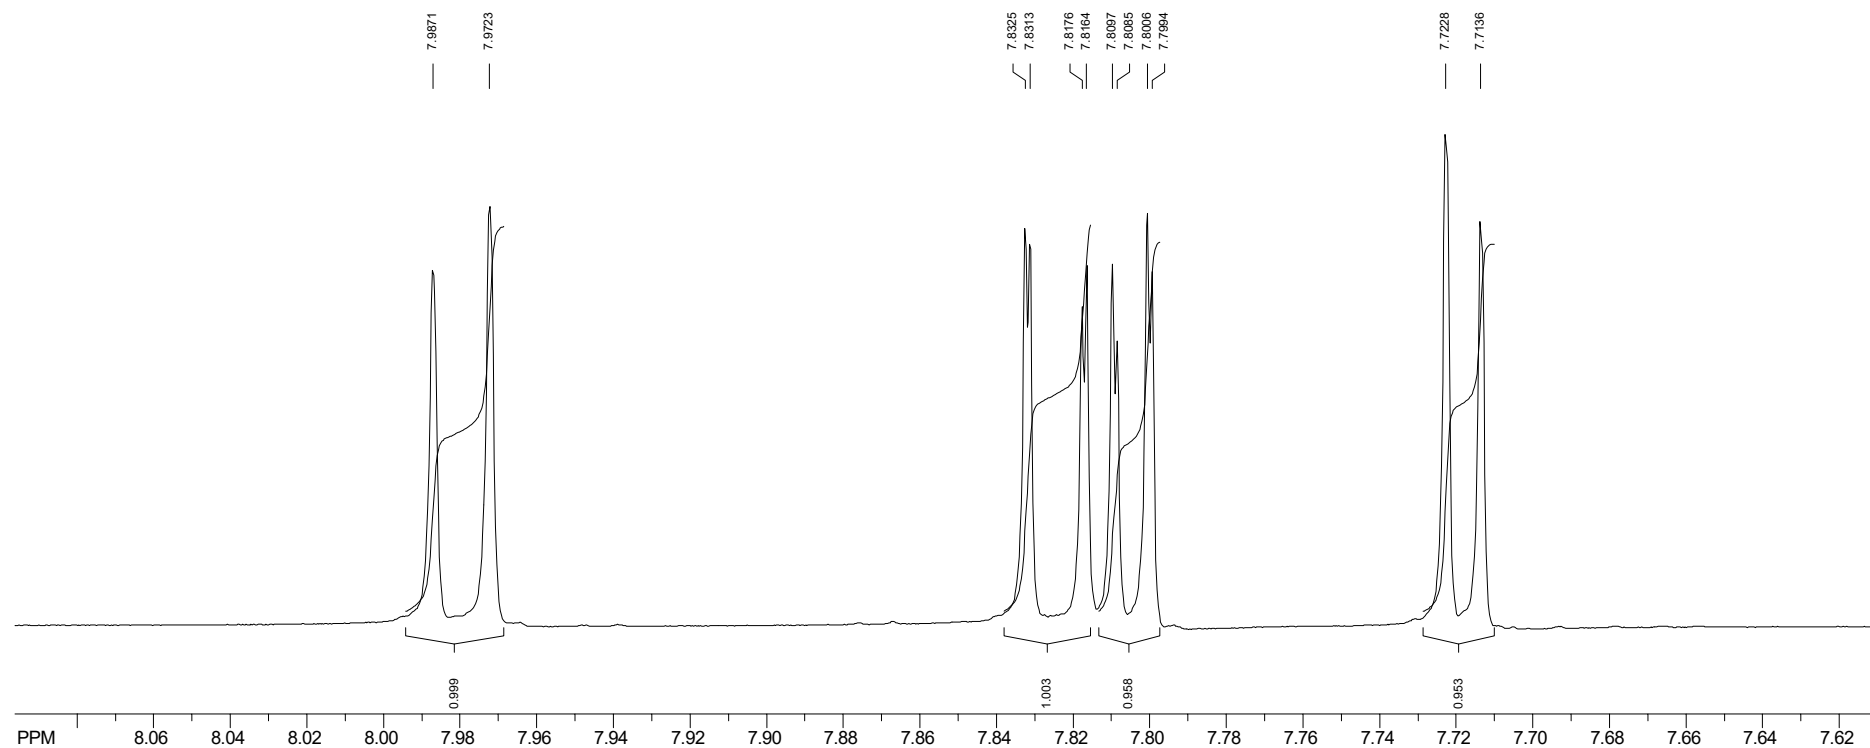

file: C:\Users\irena\Desktop\IDA SELEC\NMR spektri\SVI KONACNI NMR\Raw data\_NMR\icaleta-2023-02-01\_41-ZG6 spoj 46P2 1H, 13C, COSY\10\fid exp1 <zg30>  
 transmitter freq.: 600.135401 MHz  
 time domain size: 131072 points  
 width: 12019.23 Hz = 20.027532 ppm = 0.091699 Hz/pt  
 number of scans: 64

freq. of 0 ppm: 600.130000 MHz  
 processed size: 65536 complex points  
 LB: 0.000 GB: 0.00000

**Figure S32.** Aromatic part of the  $^1\text{H}$  NMR spectrum ( $\text{CDCl}_3$ ) of compound **12**.

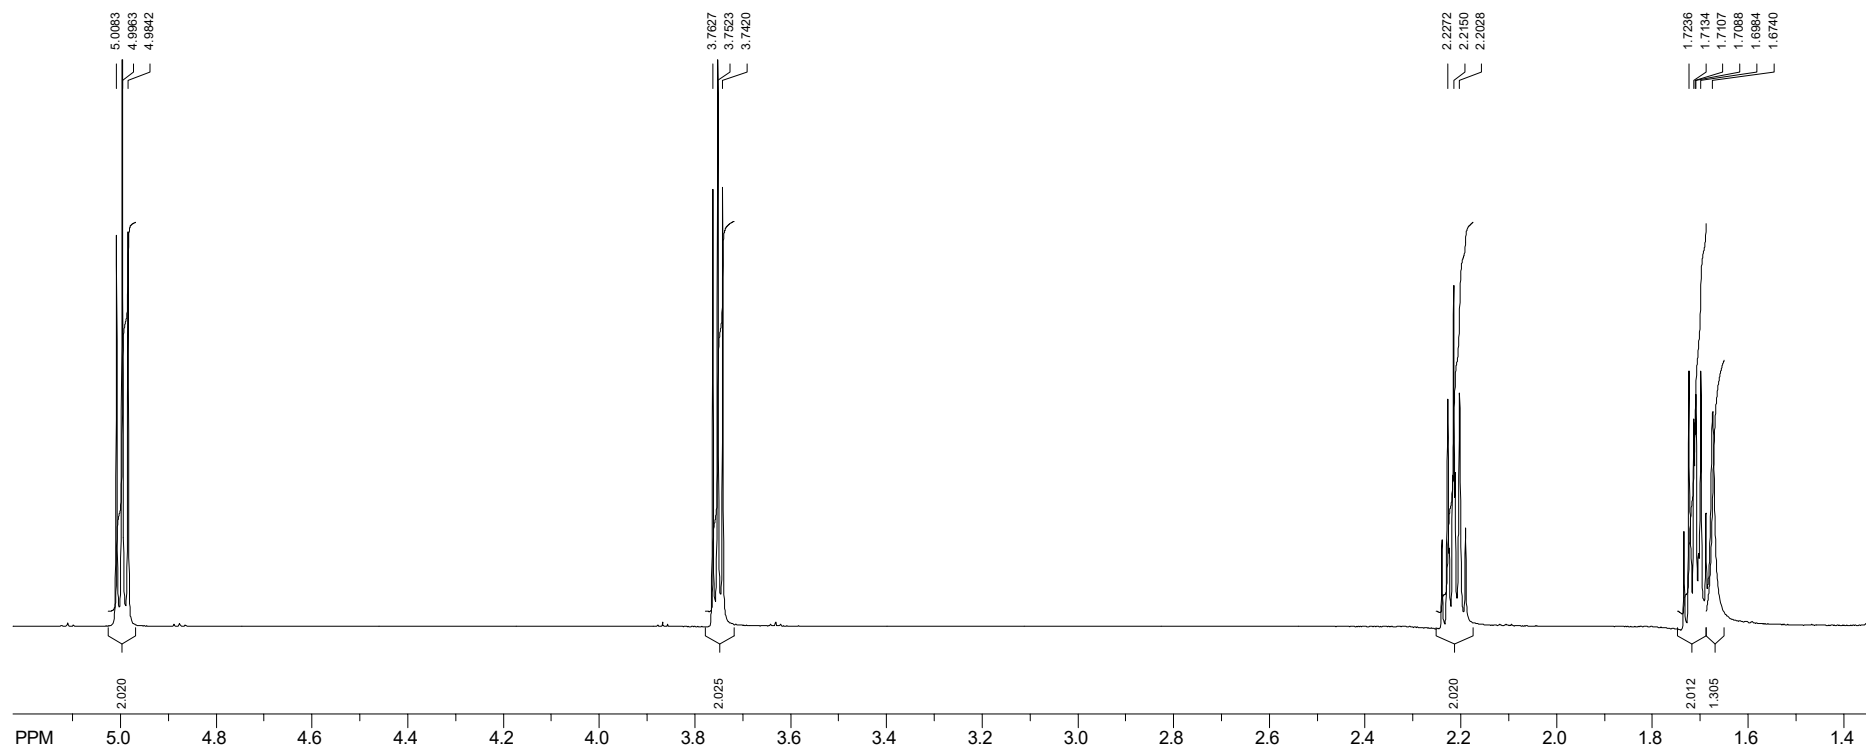

file: C:\Users\irena\Desktop\DA SELEC\NMR spektr\SVI KONACNI NMR\Raw data\_NMR\icaleta-2023-02-01\_41-ZG6 spoj 46P2 1H, 13C, COSY\10fid\_ expt <zg30>  
 transmitter freq.: 600.135401 MHz  
 time domain size: 131072 points  
 width: 12019.23 Hz = 20.027532 ppm = 0.091699 Hz/pt  
 number of scans: 64

freq. of 0 ppm: 600.130000 MHz  
 processed size: 65536 complex points  
 LB: 0.000 GB: 0.0000

**Figure S33.** Aliphatic part of the  $^1\text{H}$  NMR spectrum ( $\text{CDCl}_3$ ) of compound **12**.





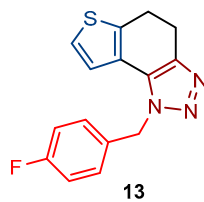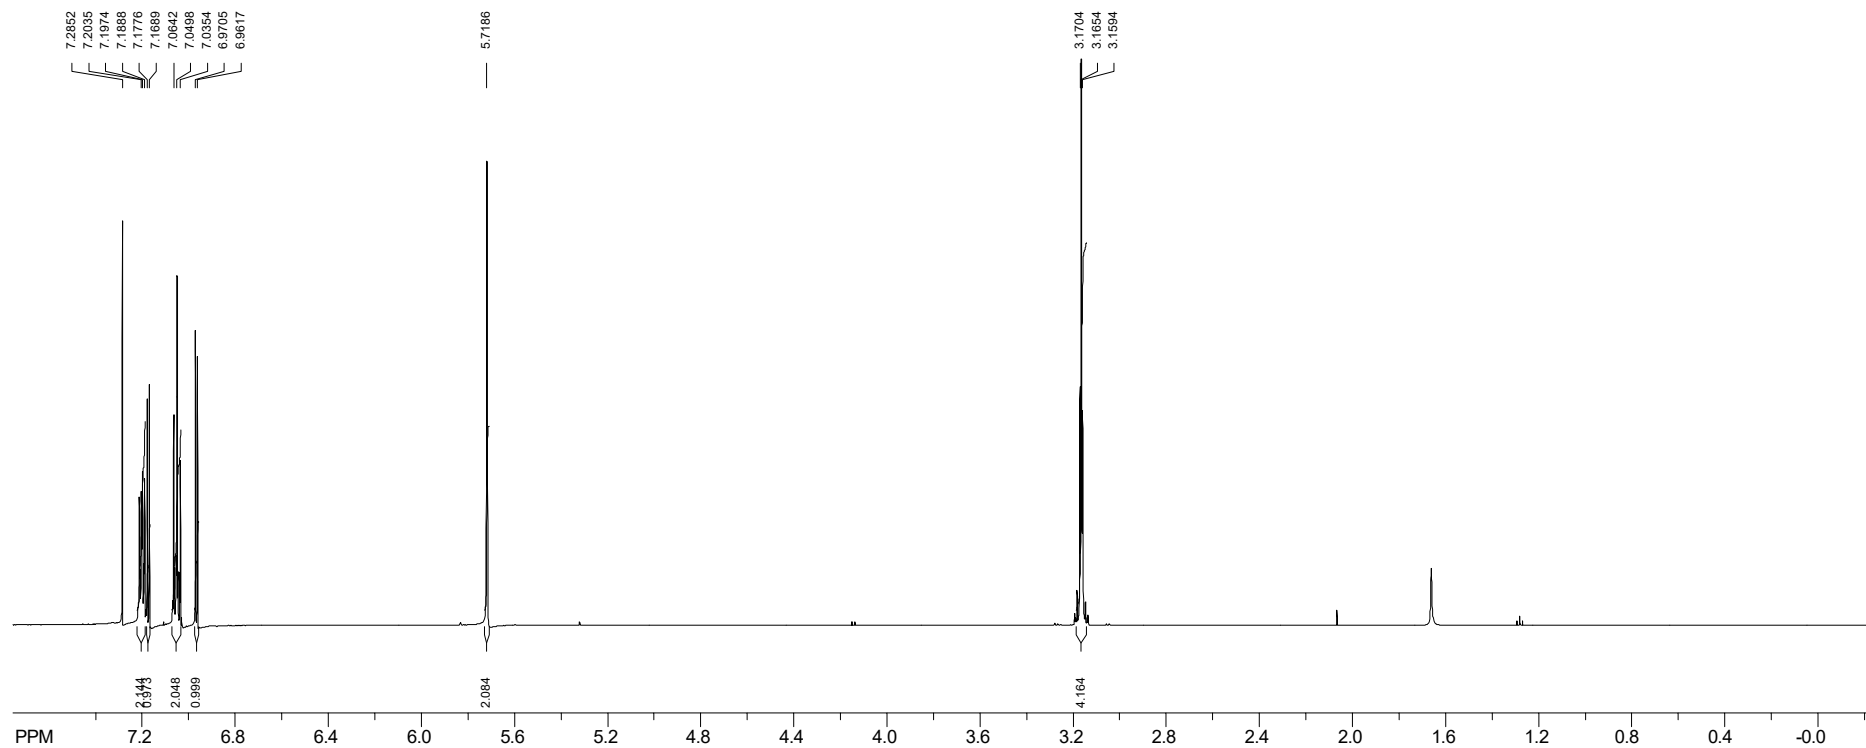

file: C:\Users\Irena\Desktop\JMS II 2023\IDA SELEC\NMR spektri\SVI KONACNI NMR\NMR KONACNO ZA KORISTITI\Raw Data\_NMR\FID2172-028101.fid expt: <zg30>  
transmitter freq.: 600.135401 MHz  
time domain size: 131072 points  
width: 12019.23 Hz = 20.027532 ppm = 0.091699 Hz/pt  
number of scans: 64

freq. of 0 ppm: 600.130000 MHz  
processed size: 65536 complex points  
LB: 0.000 GB: 0.0000

**Figure S35.**  $^1\text{H}$  NMR spectrum ( $\text{CDCl}_3$ ) of compound **13**.

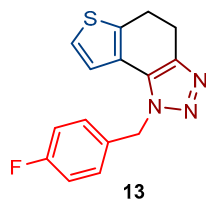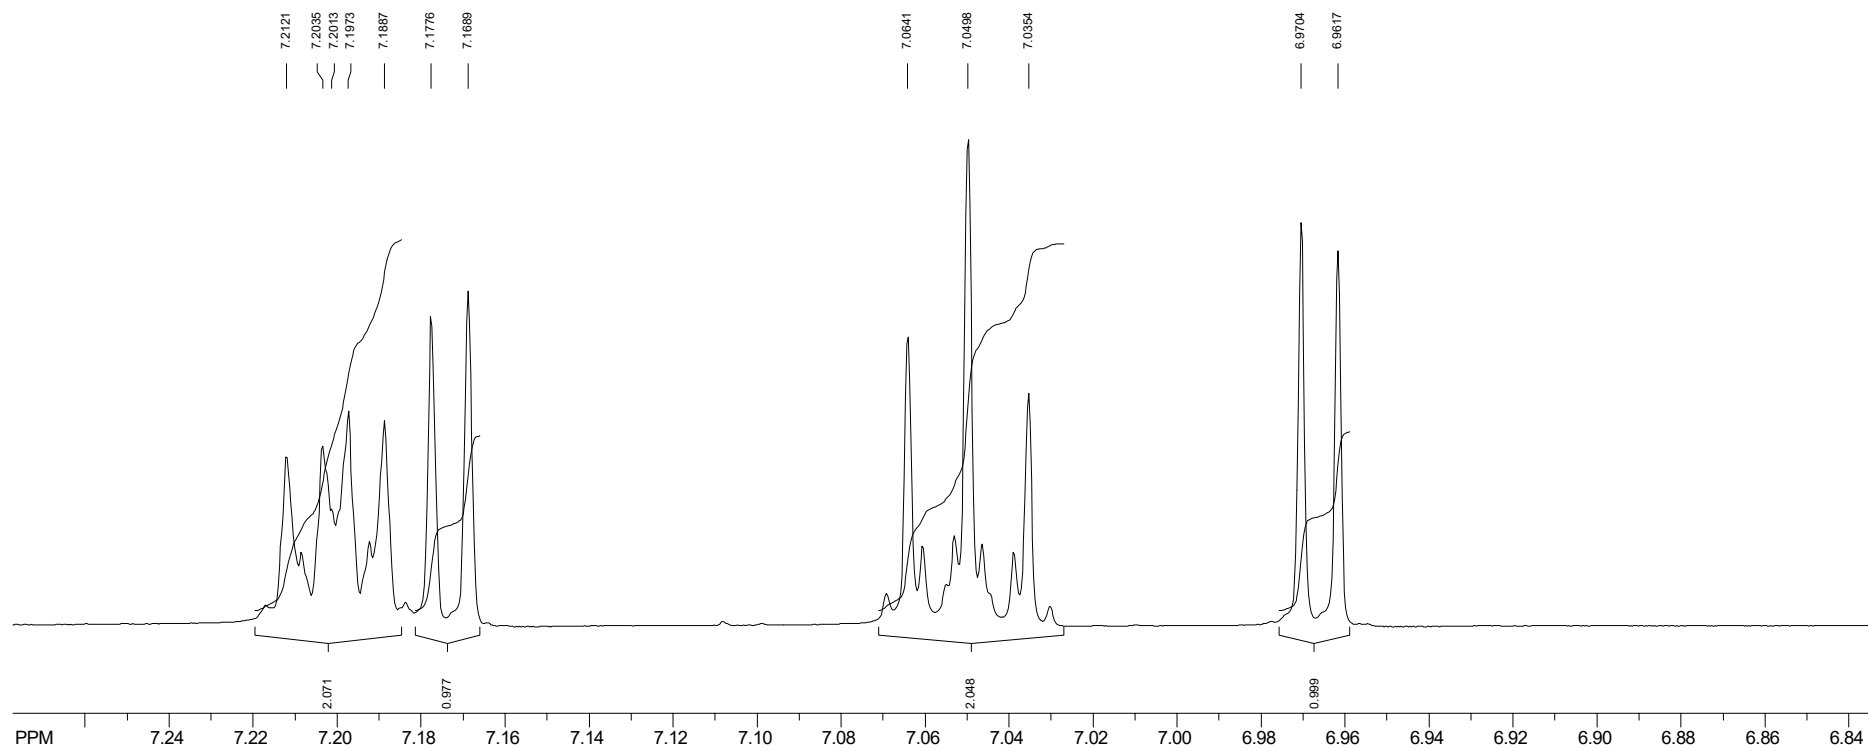

file: C:\Users\irena\Desktop\IDA SELEC\NMR spektri\SVI KONACNI NMR\Raw data\_NMR\icaleta-2023-02-01\_36-Z36 spoj 28P2 1H10\fid exp: <zg30>  
transmitter freq.: 600.135401 MHz  
time domain size: 131072 points  
width: 12019.23 Hz = 20.027532 ppm = 0.091699 Hz/pt  
number of scans: 64

freq. of 0 ppm: 600.130000 MHz  
processed size: 65536 complex points  
LB: 0.000 GB: 0.0000

**Figure S36.** Aromatic part of the  $^1\text{H}$  NMR spectrum ( $\text{CDCl}_3$ ) of compound **13**.

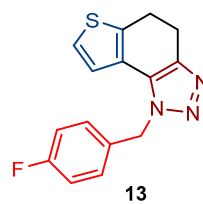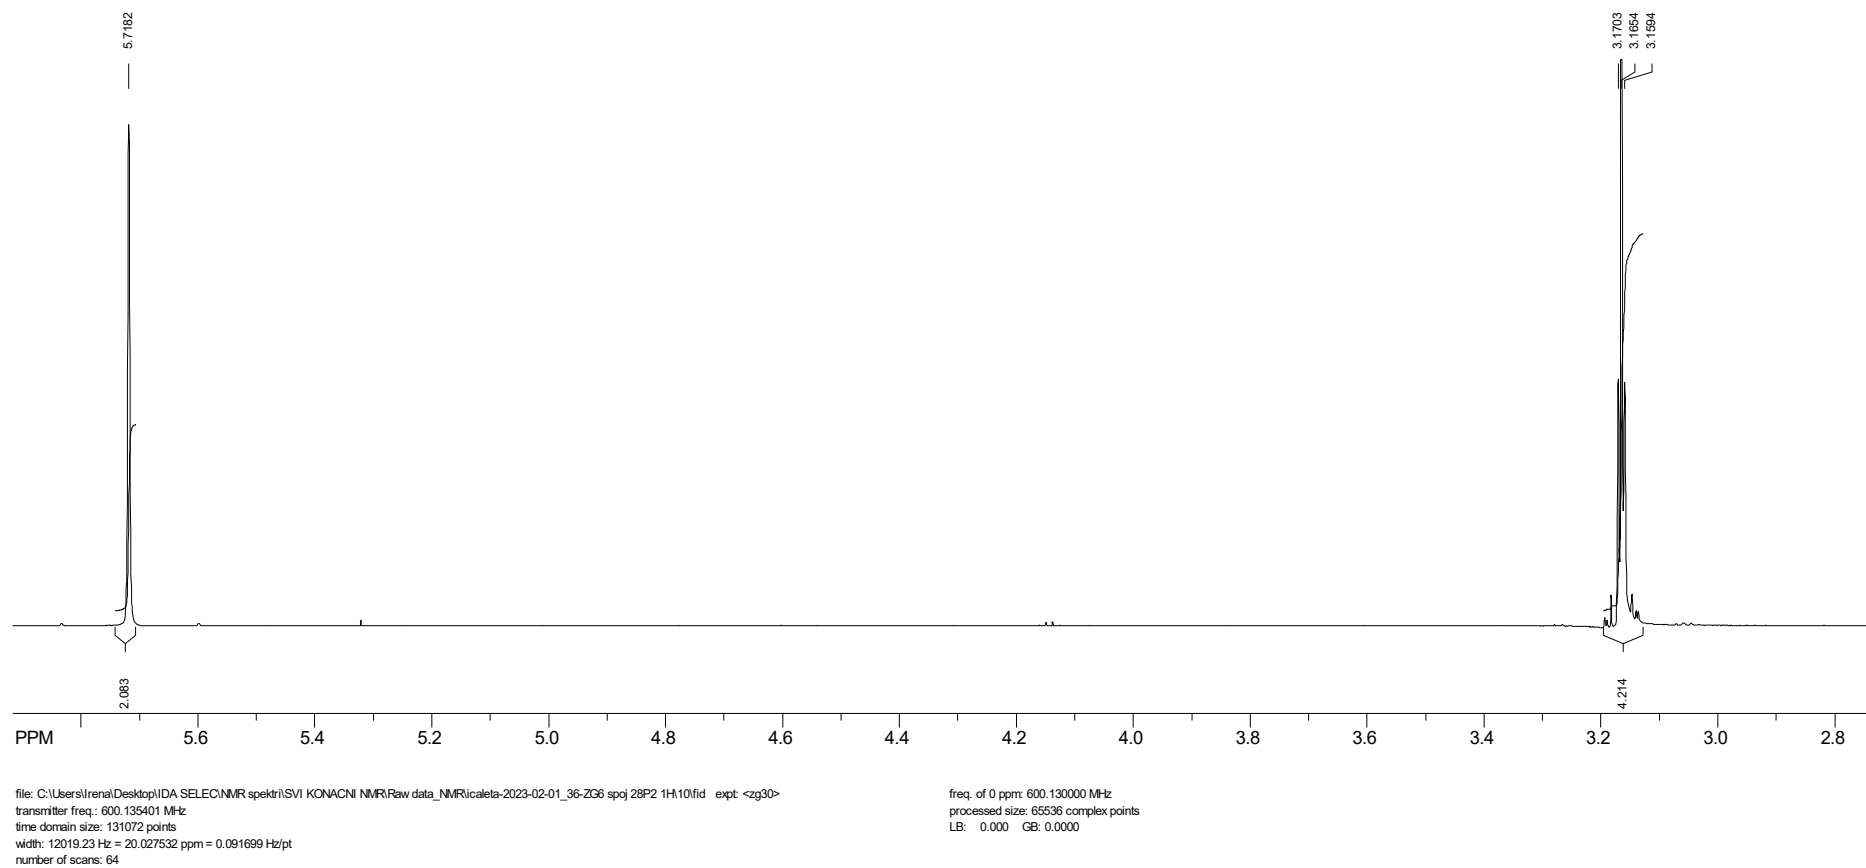

**Figure S37.** Aliphatic part of the  $^1\text{H}$  NMR spectrum ( $\text{CDCl}_3$ ) of compound **13**.



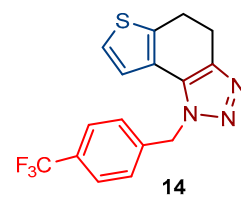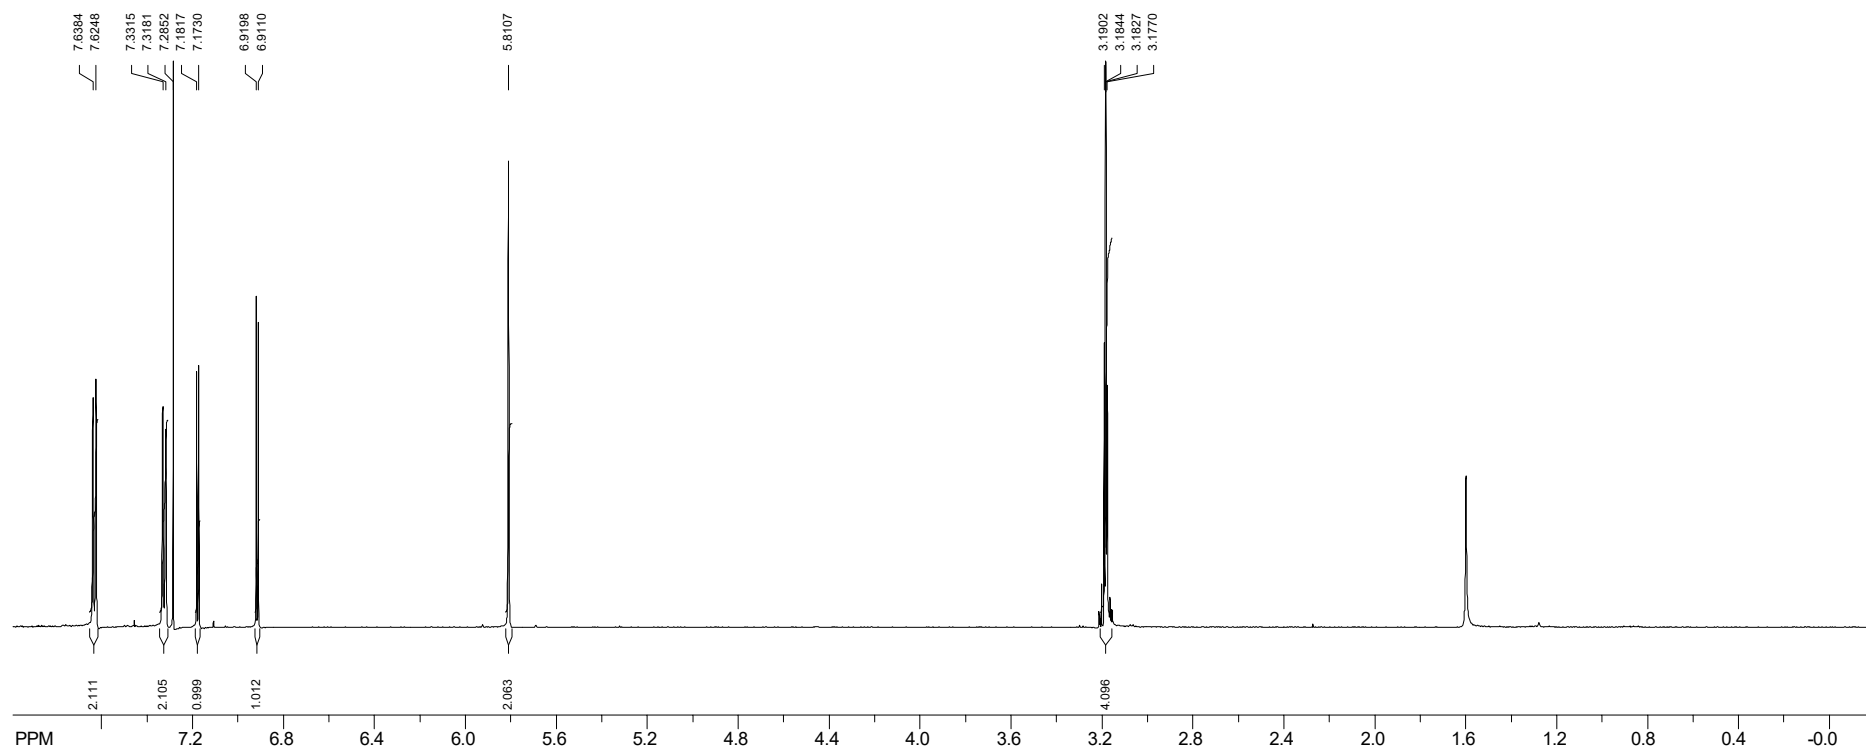

file: C:\Users\Irena\Desktop\JMS II 2023\IDA SELEC\NMR spektri\SVI KONACNI NMR\NMR KONACNO ZA KORISTITI\Raw Data\_NMR\FID2172-042\10\fid exp: <zg30>  
 transmitter freq.: 600.135401 MHz  
 time domain size: 131072 points  
 width: 12019.23 Hz = 20.027532 ppm = 0.091699 Hz/pt  
 number of scans: 64

freq. of 0 ppm: 600.130000 MHz  
 processed size: 65536 complex points  
 LB: 0.000 GB: 0.0000

**Figure S39.**  $^1\text{H}$  NMR spectrum ( $\text{CDCl}_3$ ) of compound **14**.

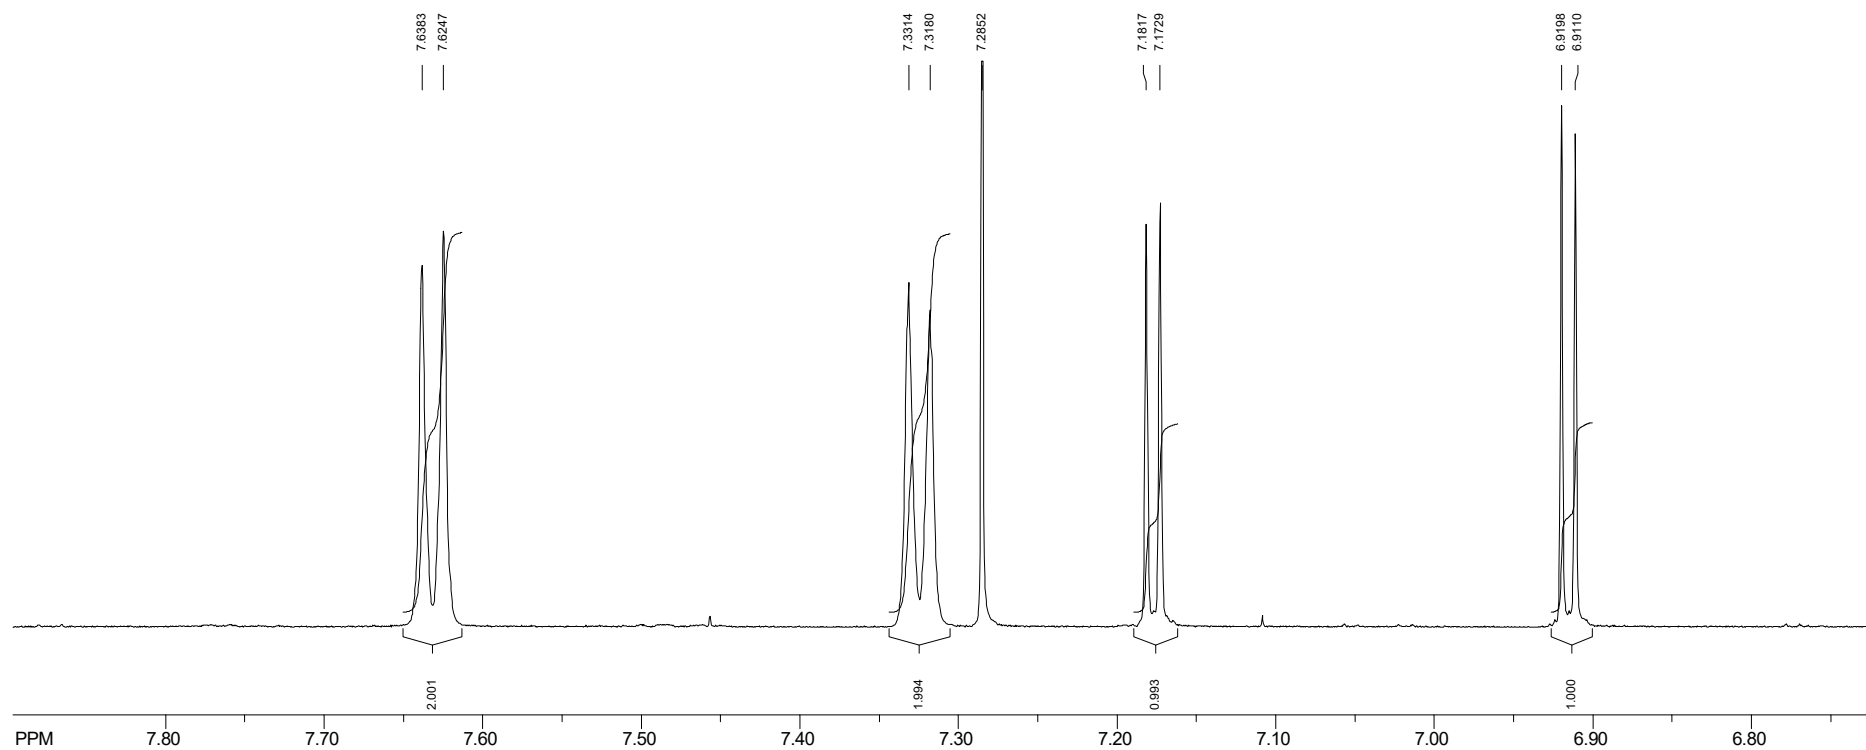

file: C:\Users\lrenal\Desktop\IDA SELEC\NMR spektri\SVI KONACNI NMR\Raw data\_NMR\icaleta-2023-02-01\_32-ZG6 spoj 42P2 1H, 13C\10\fid exp: <zg30>  
 transmitter freq.: 600.135401 MHz  
 time domain size: 131072 points  
 width: 12019.23 Hz = 20.027532 ppm = 0.091699 Hz/pt  
 number of scans: 64

freq. of 0 ppm: 600.130000 MHz  
 processed size: 65536 complex points  
 LB: 0.000 GB: 0.0000

**Figure S40.** Aromatic part of the  $^1\text{H}$  NMR spectrum ( $\text{CDCl}_3$ ) of compound **14**.

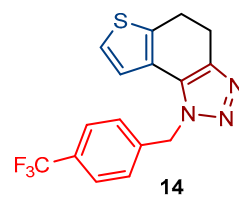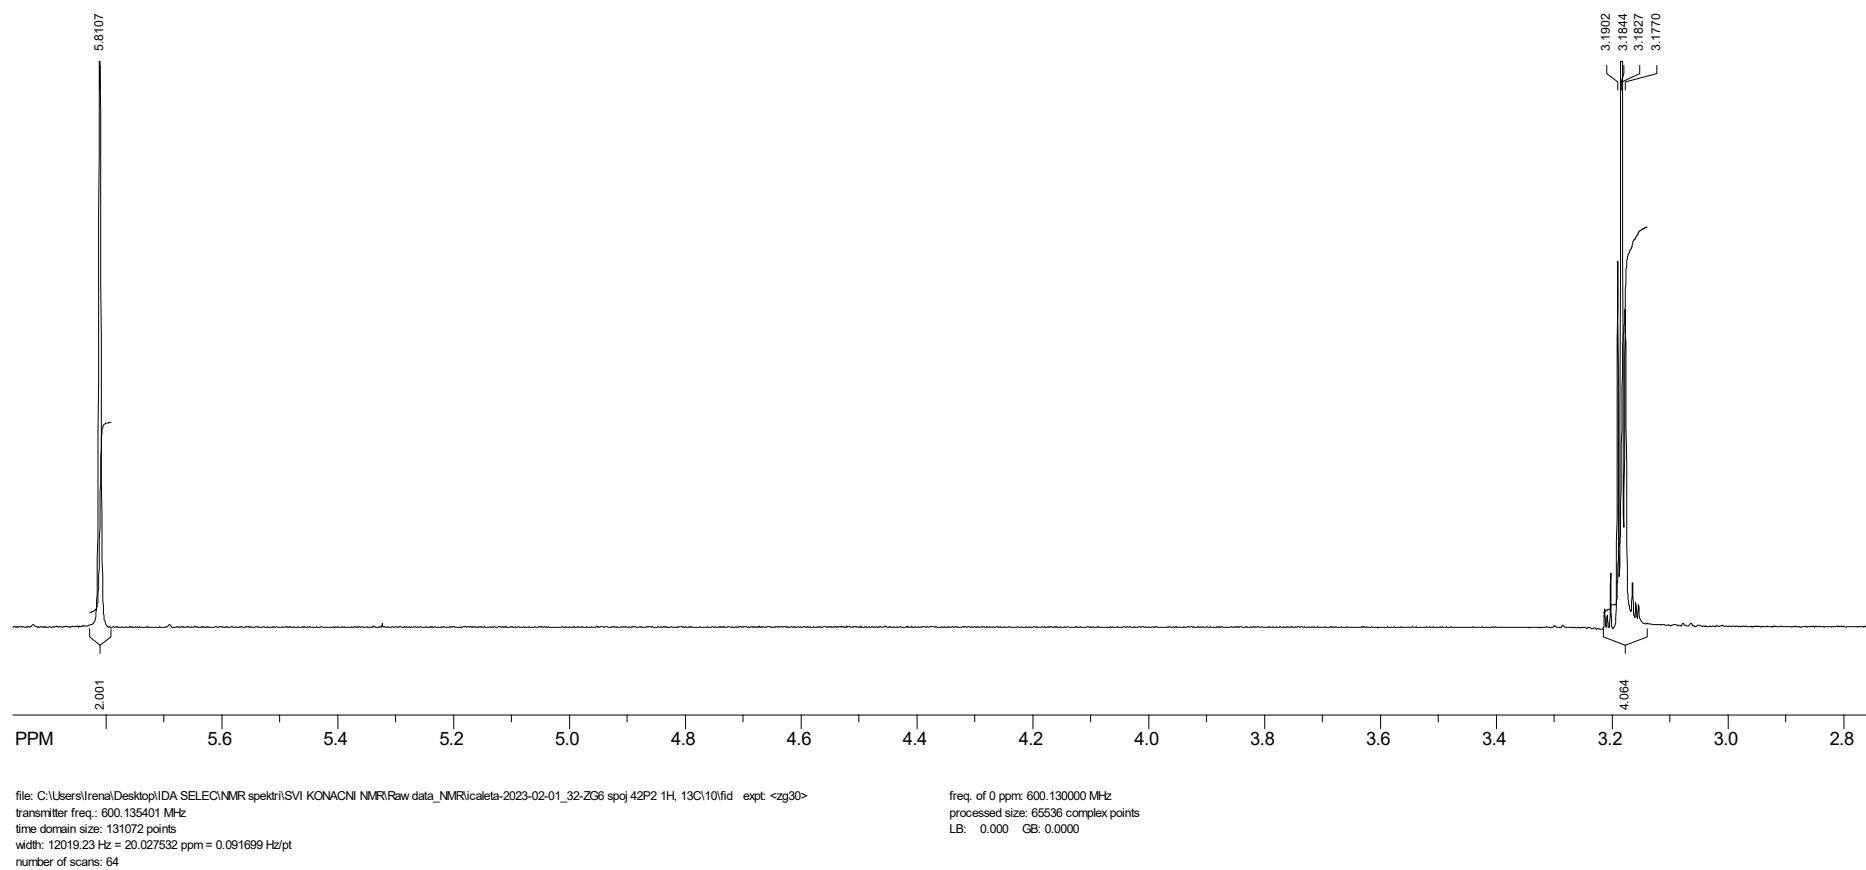

**Figure S41.** Aliphatic part of the  $^1\text{H}$  NMR spectrum ( $\text{CDCl}_3$ ) of compound **14**.





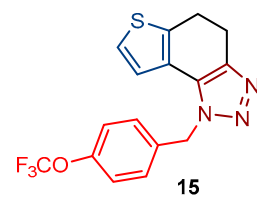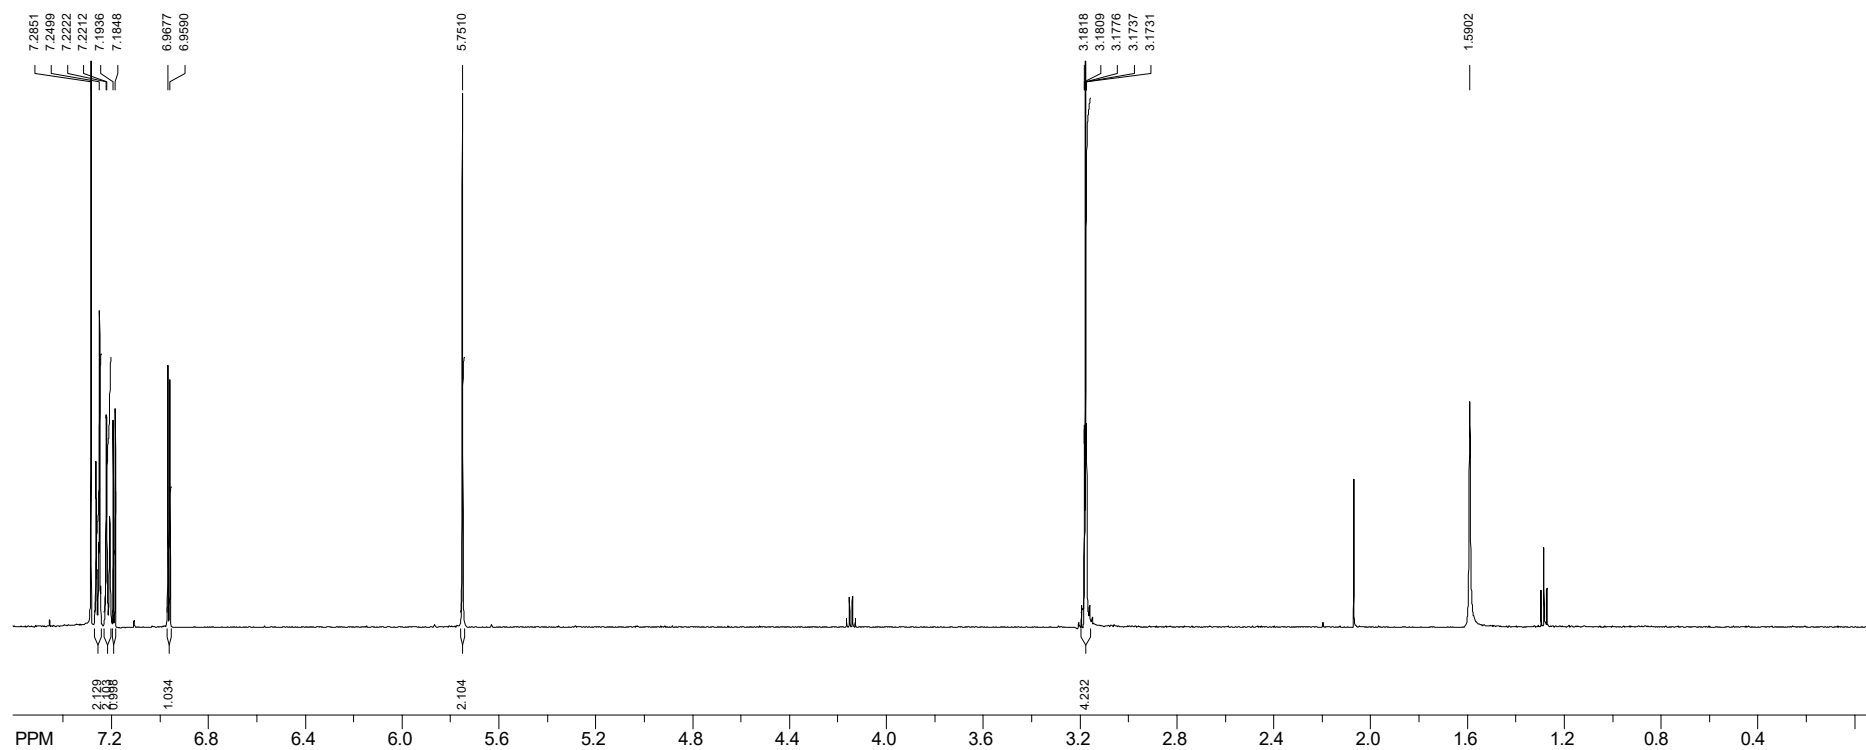

file: C:\Users\irena\Desktop\JMS II 2023\IDA SELEC\NMR spektri\SVI KONACNI NMR\NMR KONACNO ZA KORISTITI\Raw Data\_NMR\FID2172-027\10\fid exp: <zg30>  
 transmitter freq.: 600.135401 MHz  
 time domain size: 131072 points  
 width: 12019.23 Hz = 20.027532 ppm = 0.091699 Hz/pt  
 number of scans: 64

freq. of 0 ppm: 600.130000 MHz  
 processed size: 65536 complex points  
 LB: 0.000 GB: 0.0000

**Figure S43.**  $^1\text{H}$  NMR spectrum ( $\text{CDCl}_3$ ) of compound **15**.

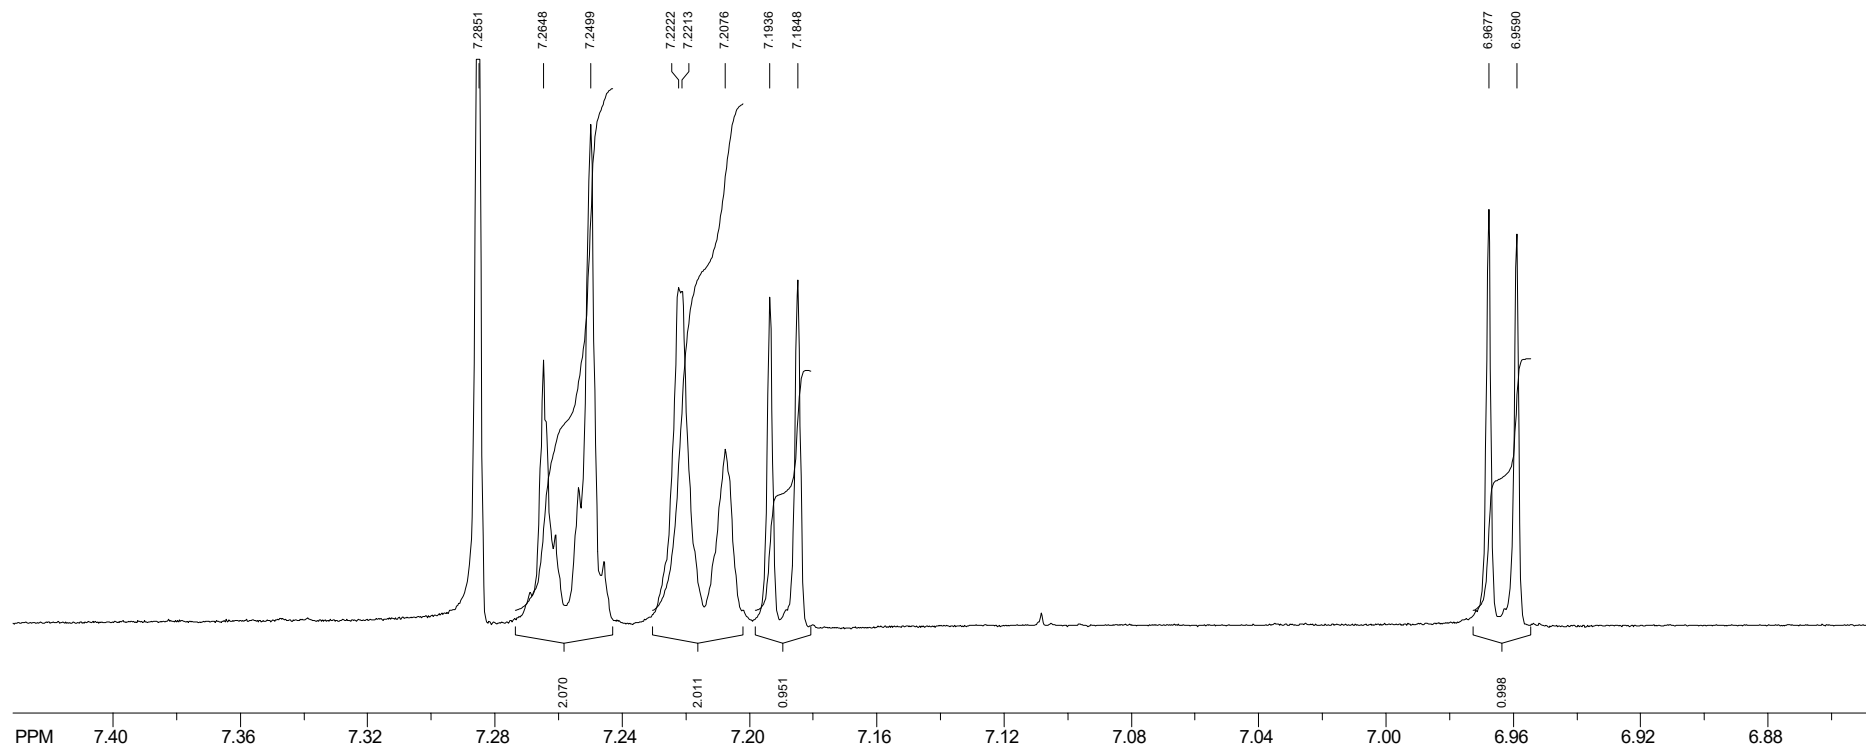

file: C:\Users\irena\Desktop\IDA SELEC\NMR spektri\SVI KONACNI NMR\Raw data\_NMR\icaleta-2023-02-01\_34-Z96 spoj 27P2 1H10fid exp: <zg30>  
transmitter freq.: 600.135401 MHz  
time domain size: 131072 points  
width: 12019.23 Hz = 20.027532 ppm = 0.091699 Hz/pt  
number of scans: 64

freq. of 0 ppm: 600.130000 MHz  
processed size: 65536 complex points  
LB: 0.000 GB: 0.0000

**Figure S44.** Aromatic part of the  $^1\text{H}$  NMR spectrum ( $\text{CDCl}_3$ ) of compound **15**.

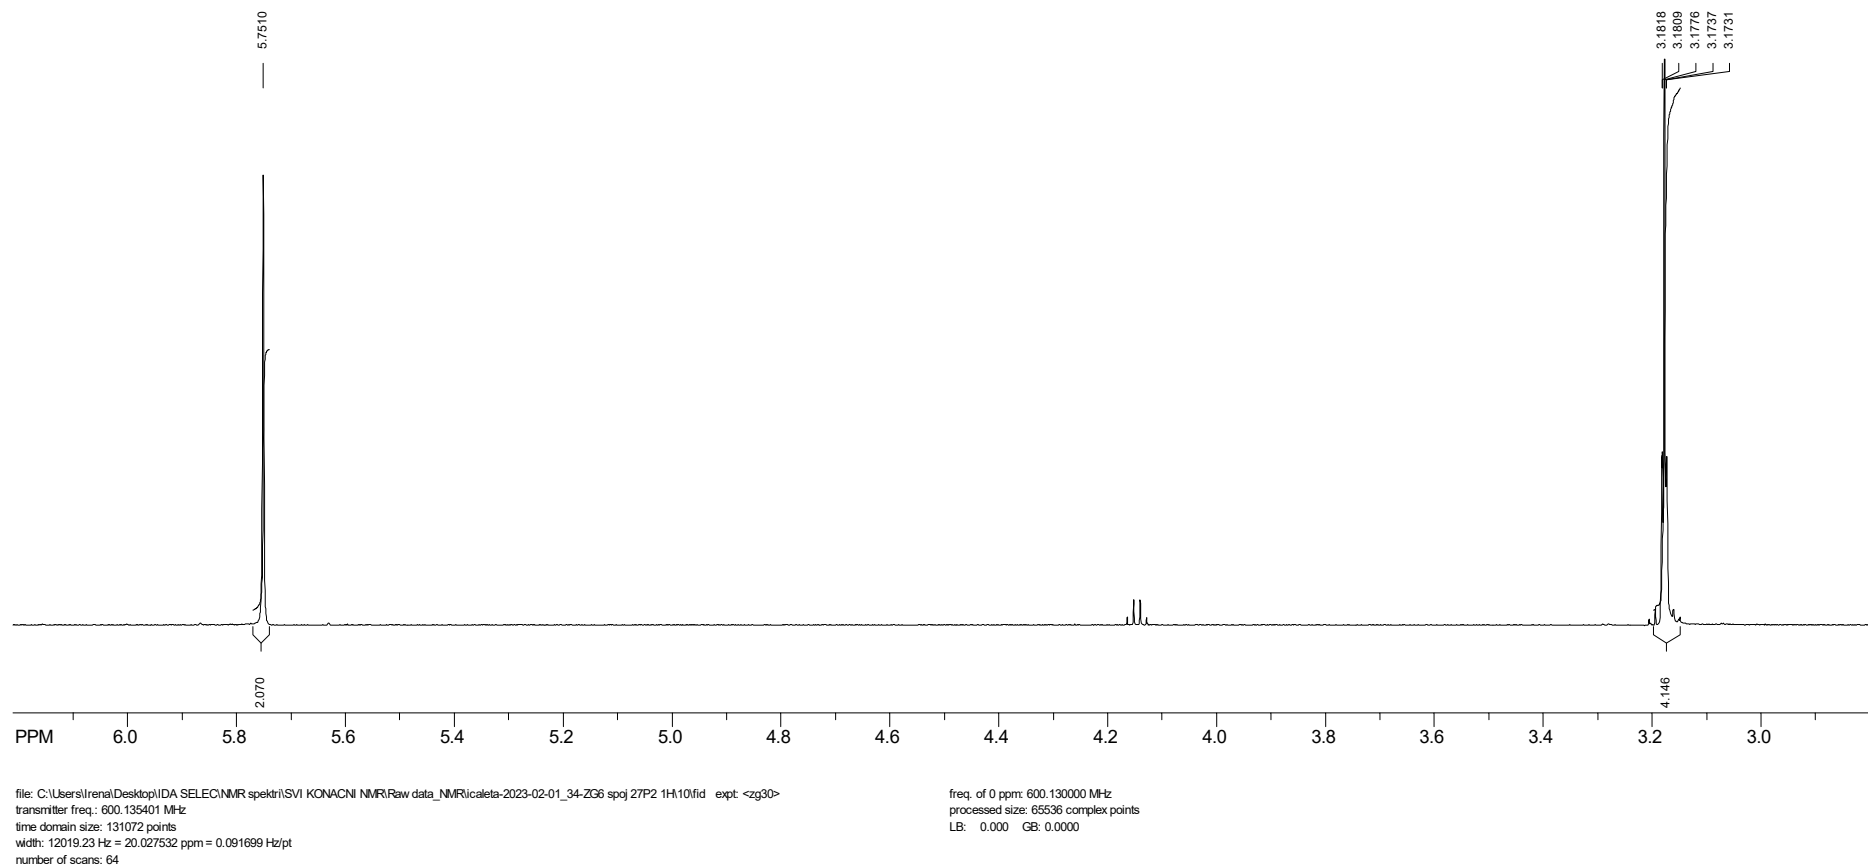

**Figure S45.** Aliphatic part of the  $^1\text{H}$  NMR spectrum ( $\text{CDCl}_3$ ) of compound **15**.



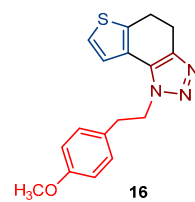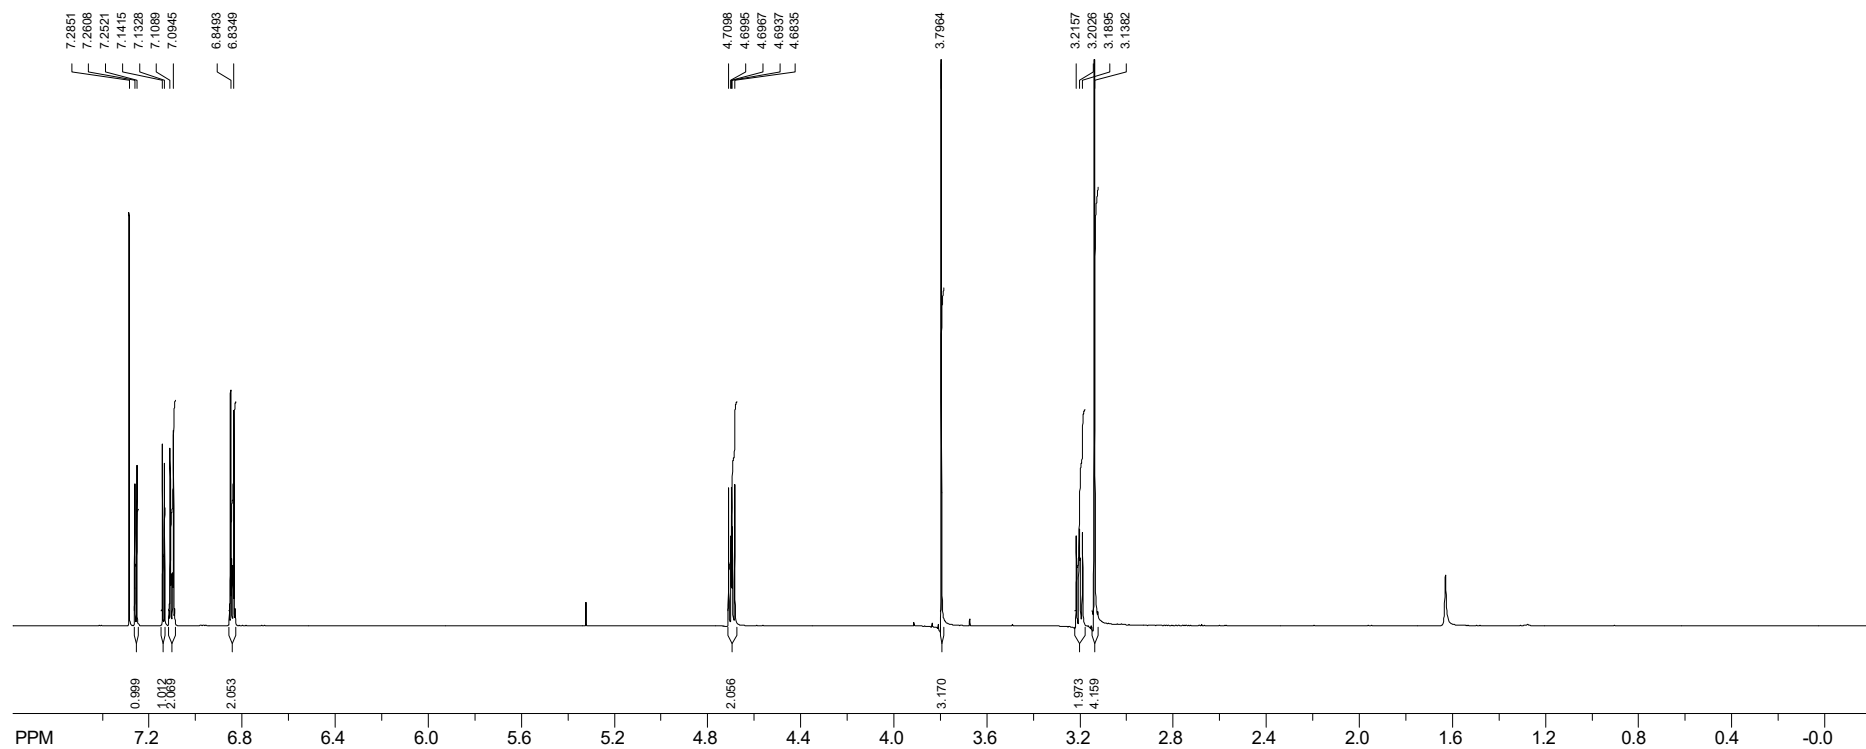

file: C:\Users\irena\Desktop\JMS II 2023\IDA SELEC\NMR spektr\SVI KONACNI NMR\NMR KONACNO ZA KORISTITI\Raw Data\_NMR\FID2172-029\10\fid exp: <zg30>  
 transmitter freq.: 600.135401 MHz  
 time domain size: 131072 points  
 width: 12019.23 Hz = 20.027532 ppm = 0.091699 Hz/pt  
 number of scans: 64

freq. of 0 ppm: 600.130000 MHz  
 processed size: 65536 complex points  
 LB: 0.000 GB: 0.0000

**Figure S47.**  $^1\text{H}$  NMR spectrum ( $\text{CDCl}_3$ ) of compound **16**.

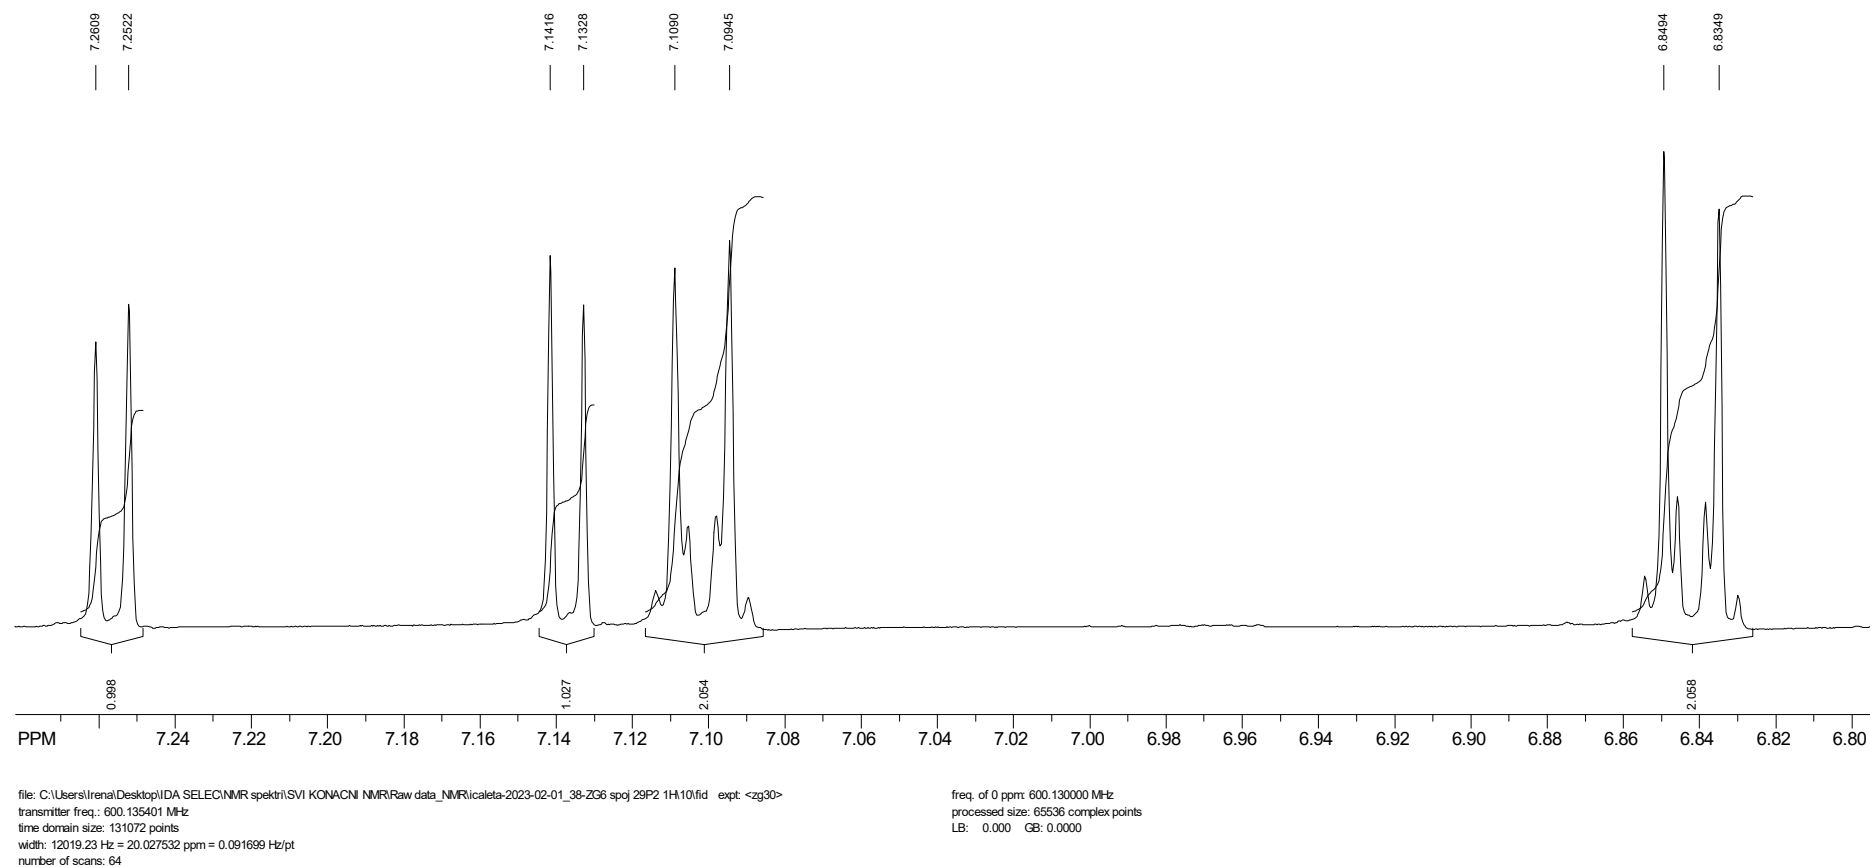

**Figure S48.** Aromatic part of the  $^1\text{H}$  NMR spectrum ( $\text{CDCl}_3$ ) of compound **16**.

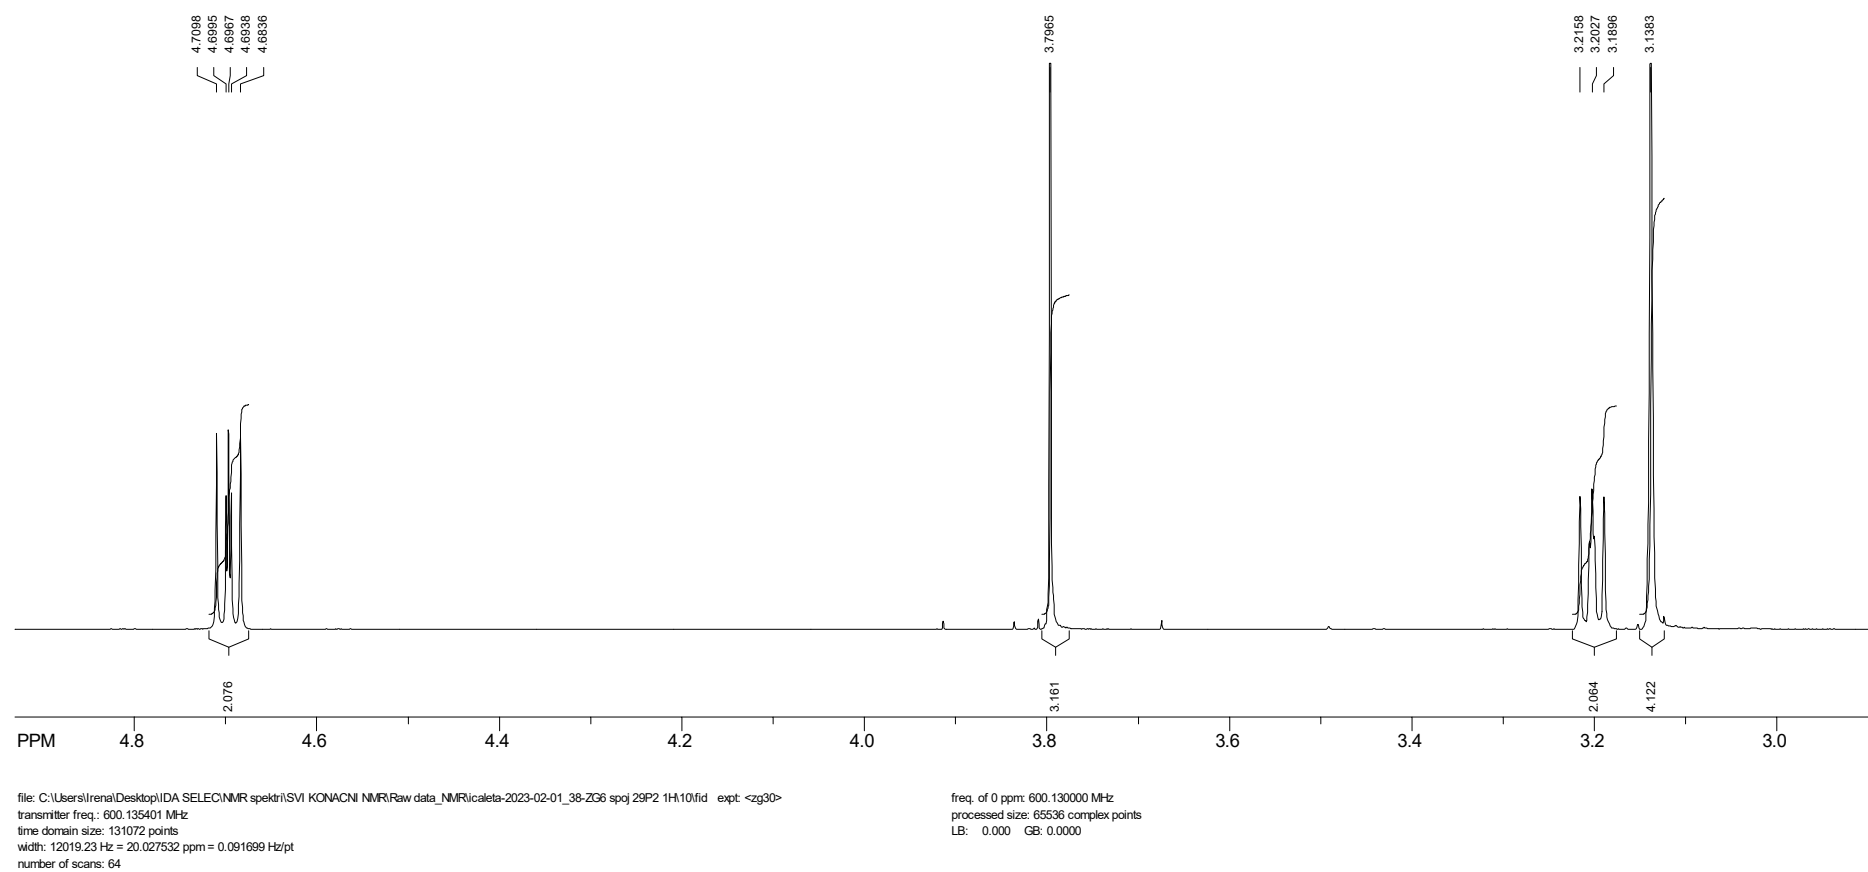

**Figure S49.** Aliphatic part of the  $^1\text{H}$  NMR spectrum ( $\text{CDCl}_3$ ) of compound **16**.





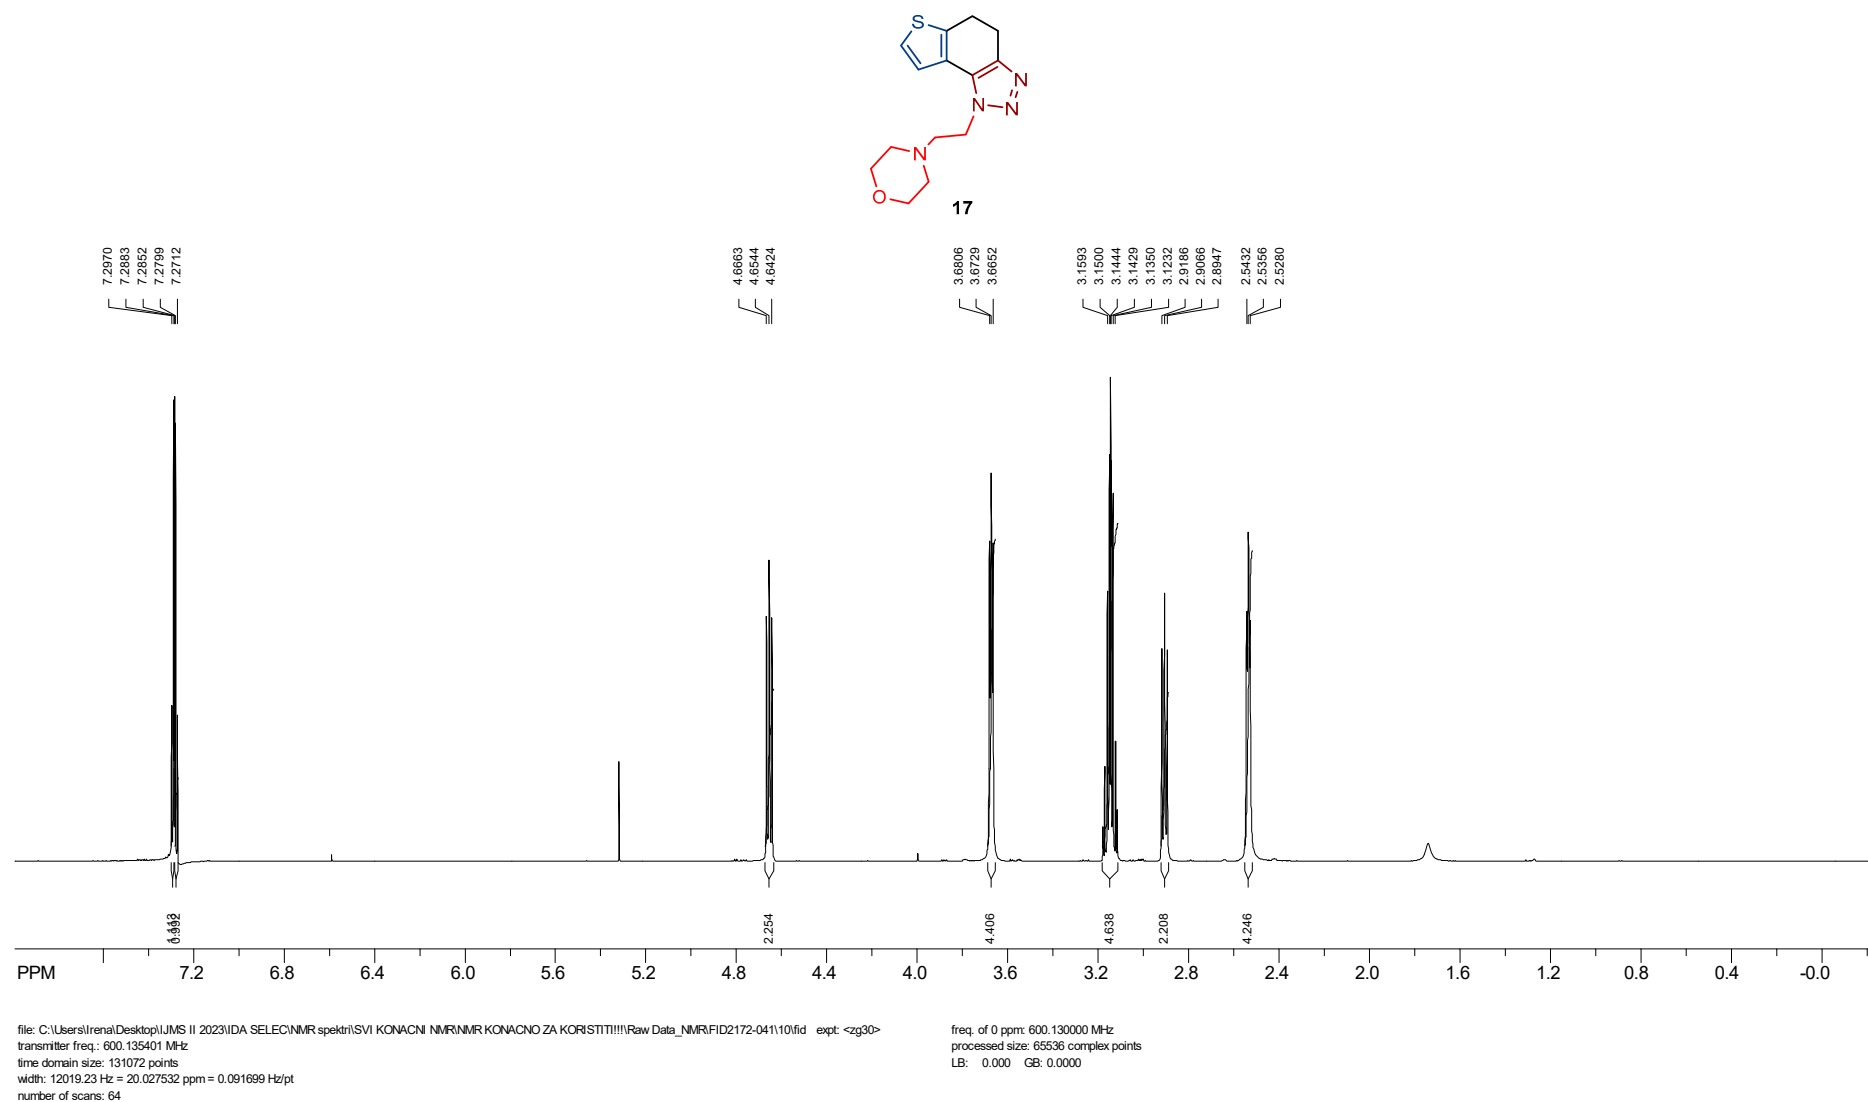

**Figure S51.**  $^1\text{H}$  NMR spectrum ( $\text{CDCl}_3$ ) of compound **17**.

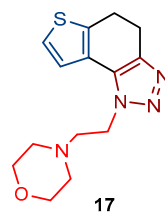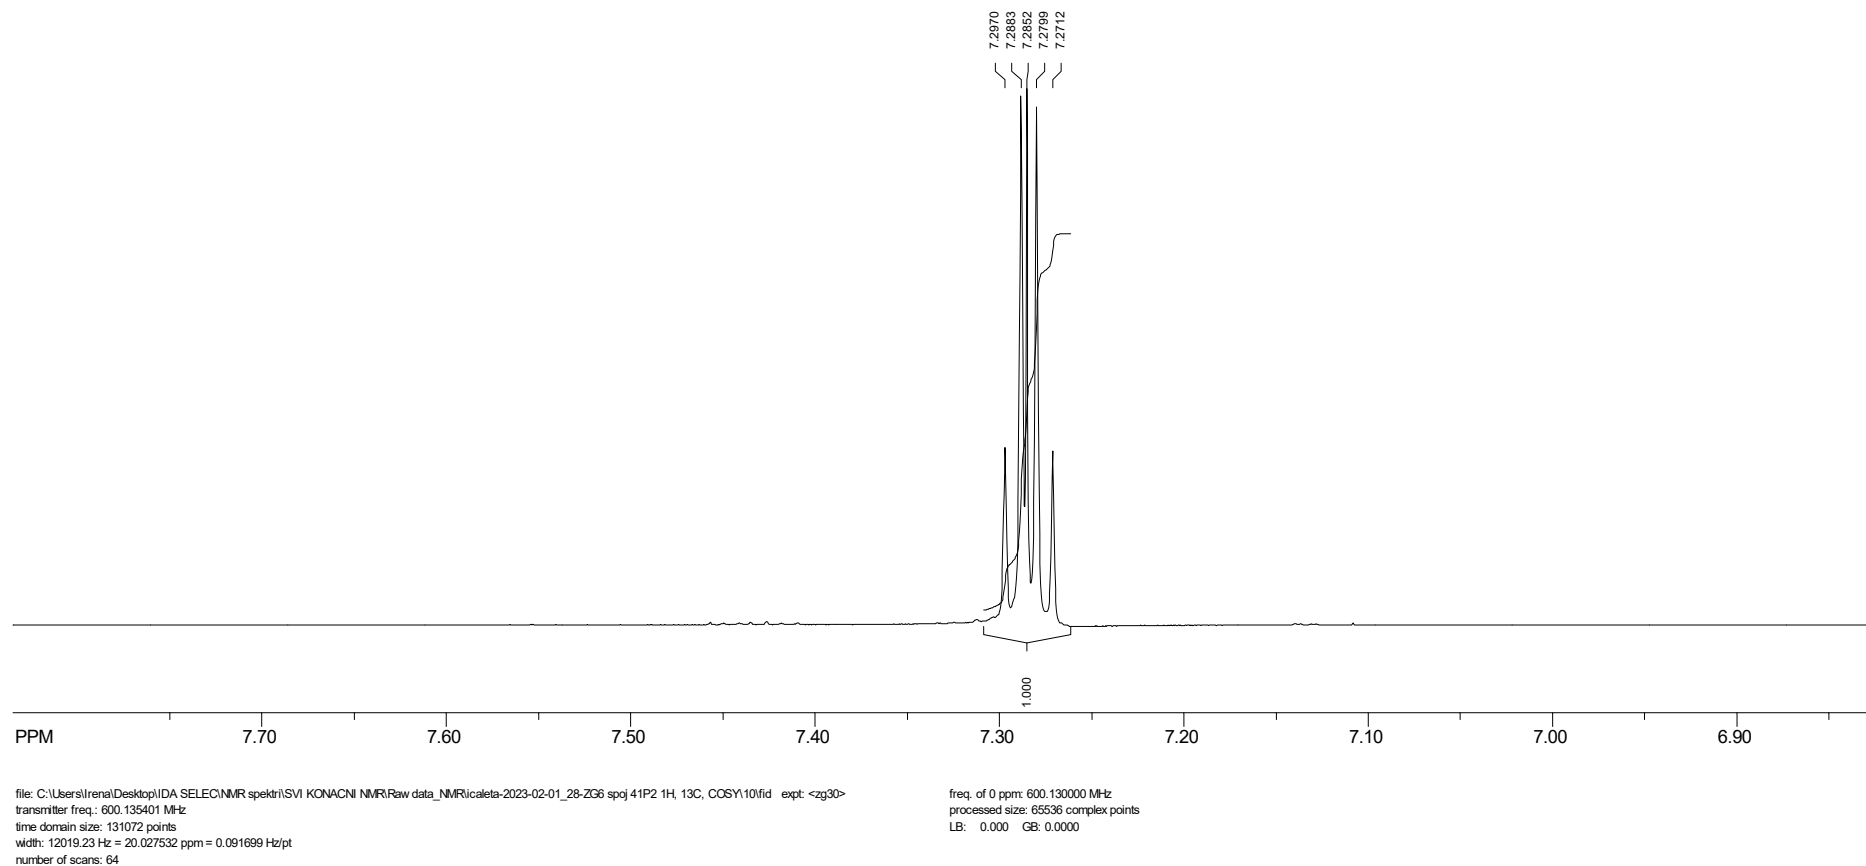

**Figure S52.** Aromatic part of the  $^1\text{H}$  NMR spectrum ( $\text{CDCl}_3$ ) of compound **17**.

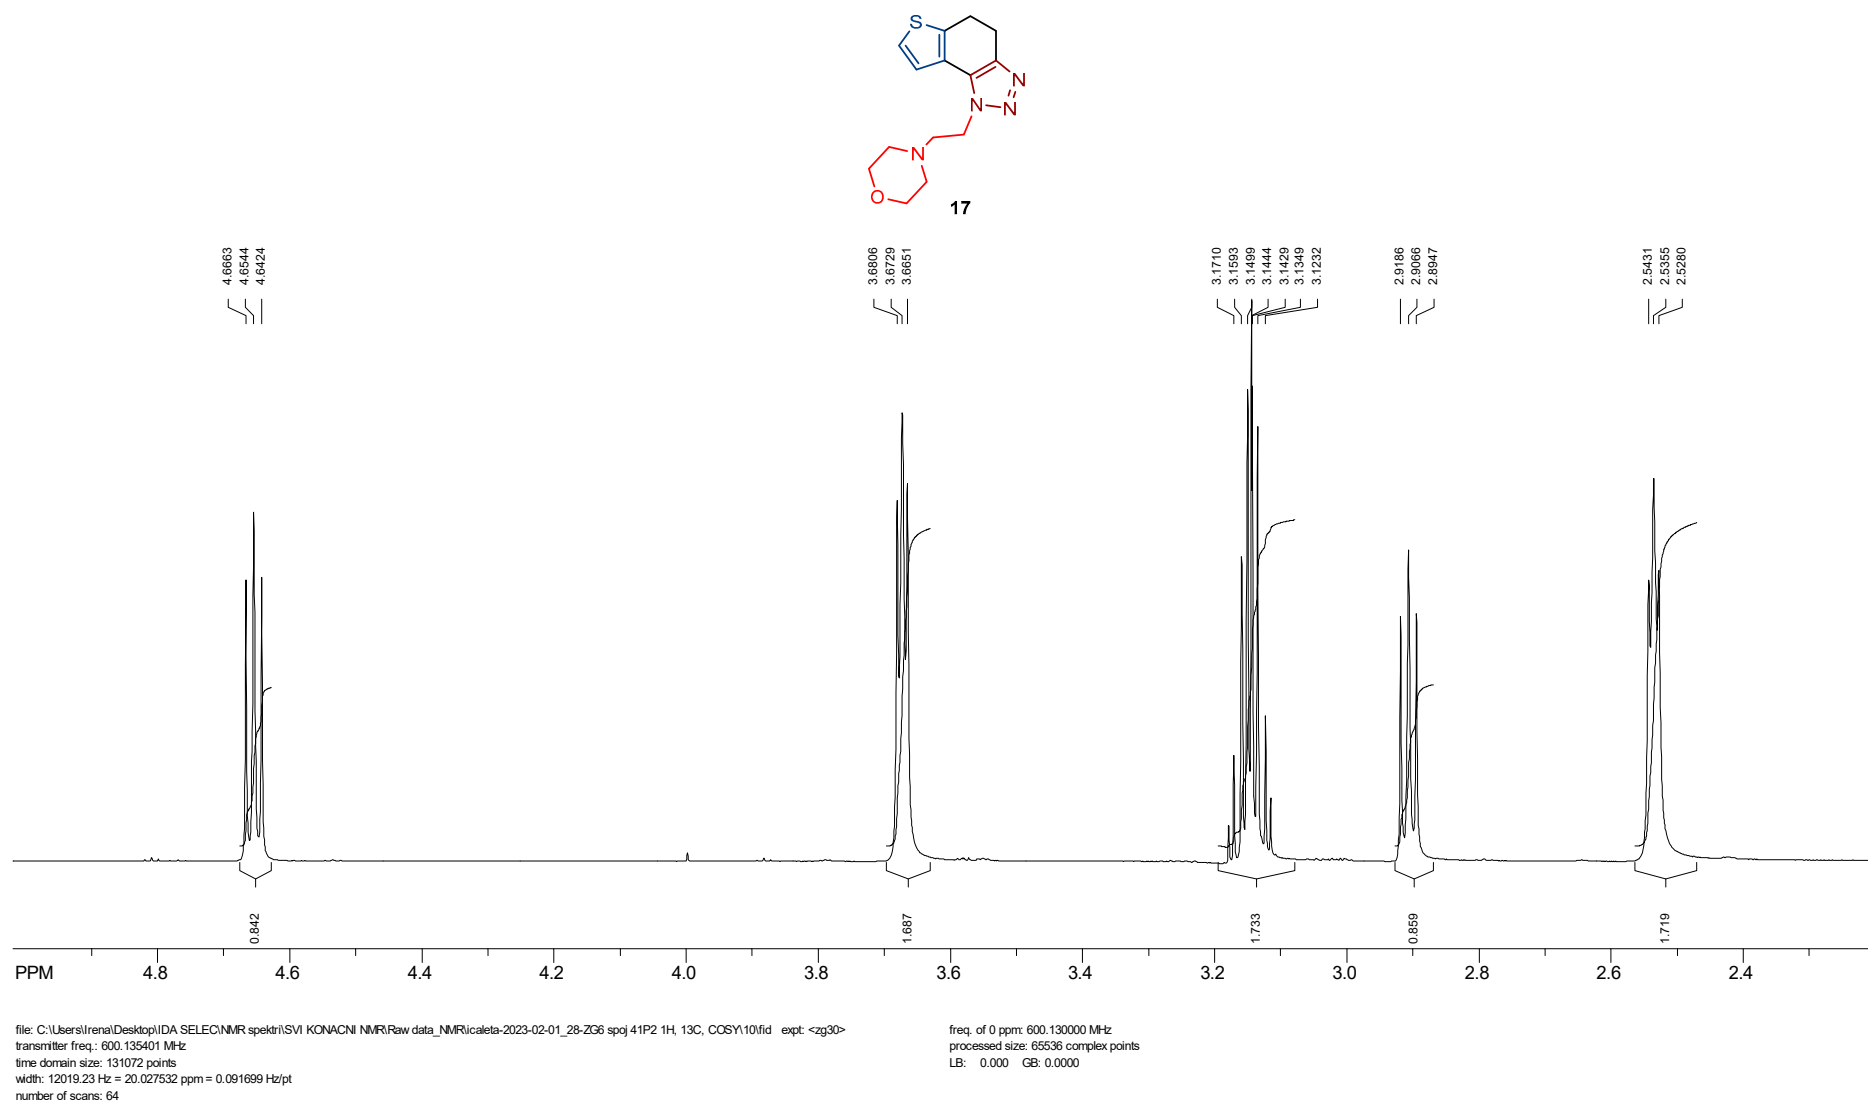

**Figure S53.** Aliphatic part of the  $^1\text{H}$  NMR spectrum ( $\text{CDCl}_3$ ) of compound **17**.



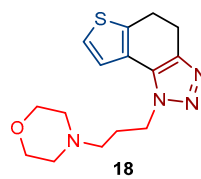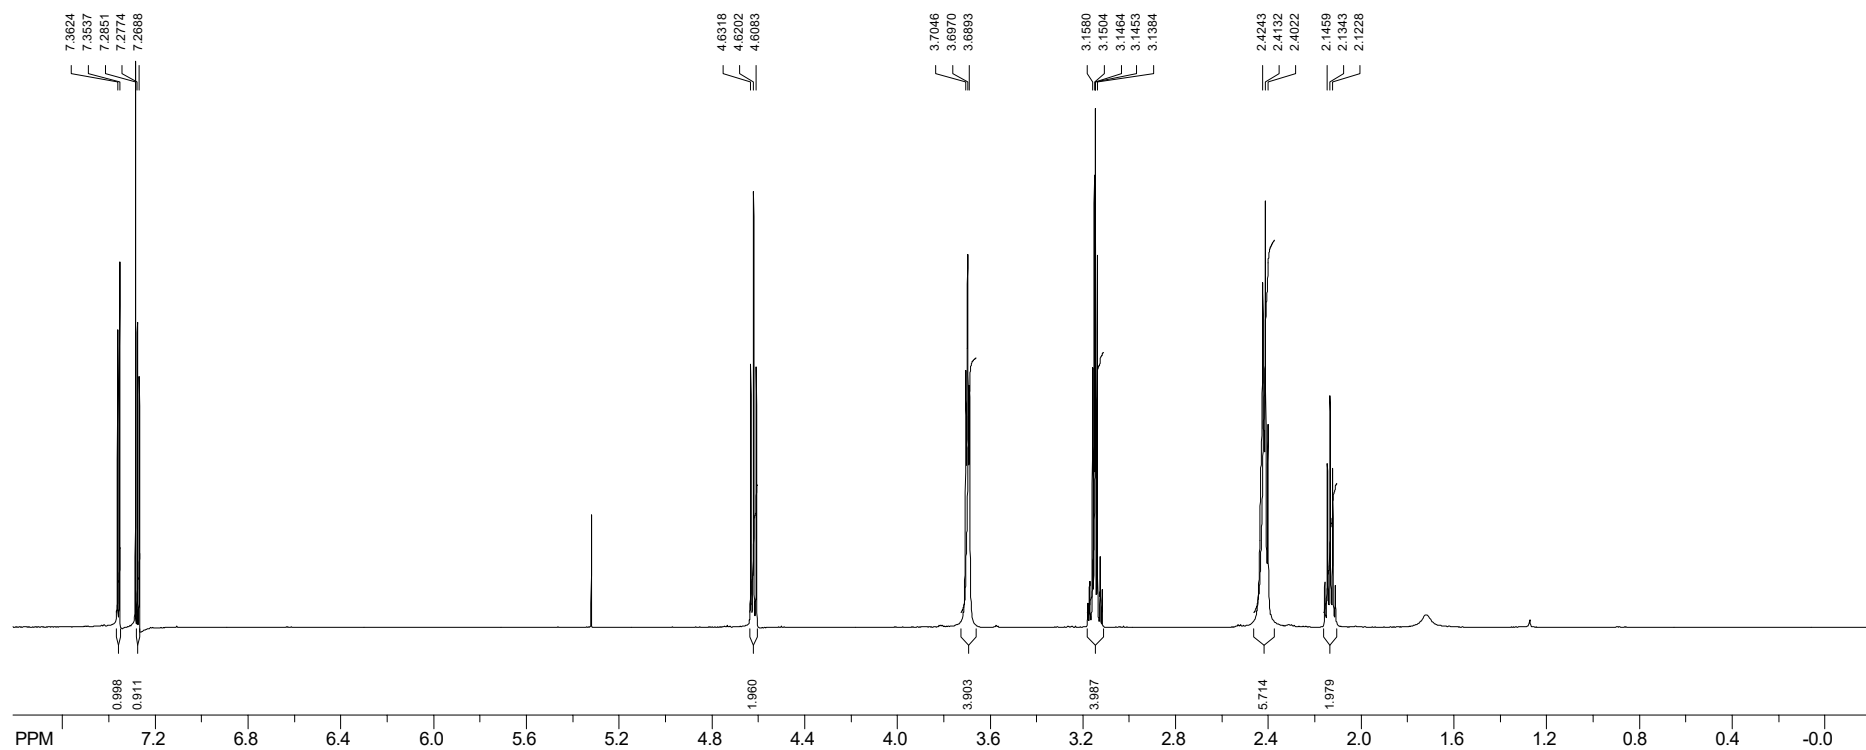

file: C:\Users\Irena\Desktop\IUMS II 2023\IDA SELEC\NMR spektri\SVI KONACNI NMR\NMR KONACNO ZA KORISTITI\Raw Data\_NMR\FID2172-037\10fid exp: <zg30>  
 transmitter freq.: 600.135401 MHz  
 time domain size: 131072 points  
 width: 12019.23 Hz = 20.027532 ppm = 0.091699 Hz/pt  
 number of scans: 64

freq. of 0 ppm: 600.130000 MHz  
 processed size: 65536 complex points  
 LB: 0.000 GB: 0.0000

**Figure S55.**  $^1\text{H}$  NMR spectrum ( $\text{CDCl}_3$ ) of compound **18**.

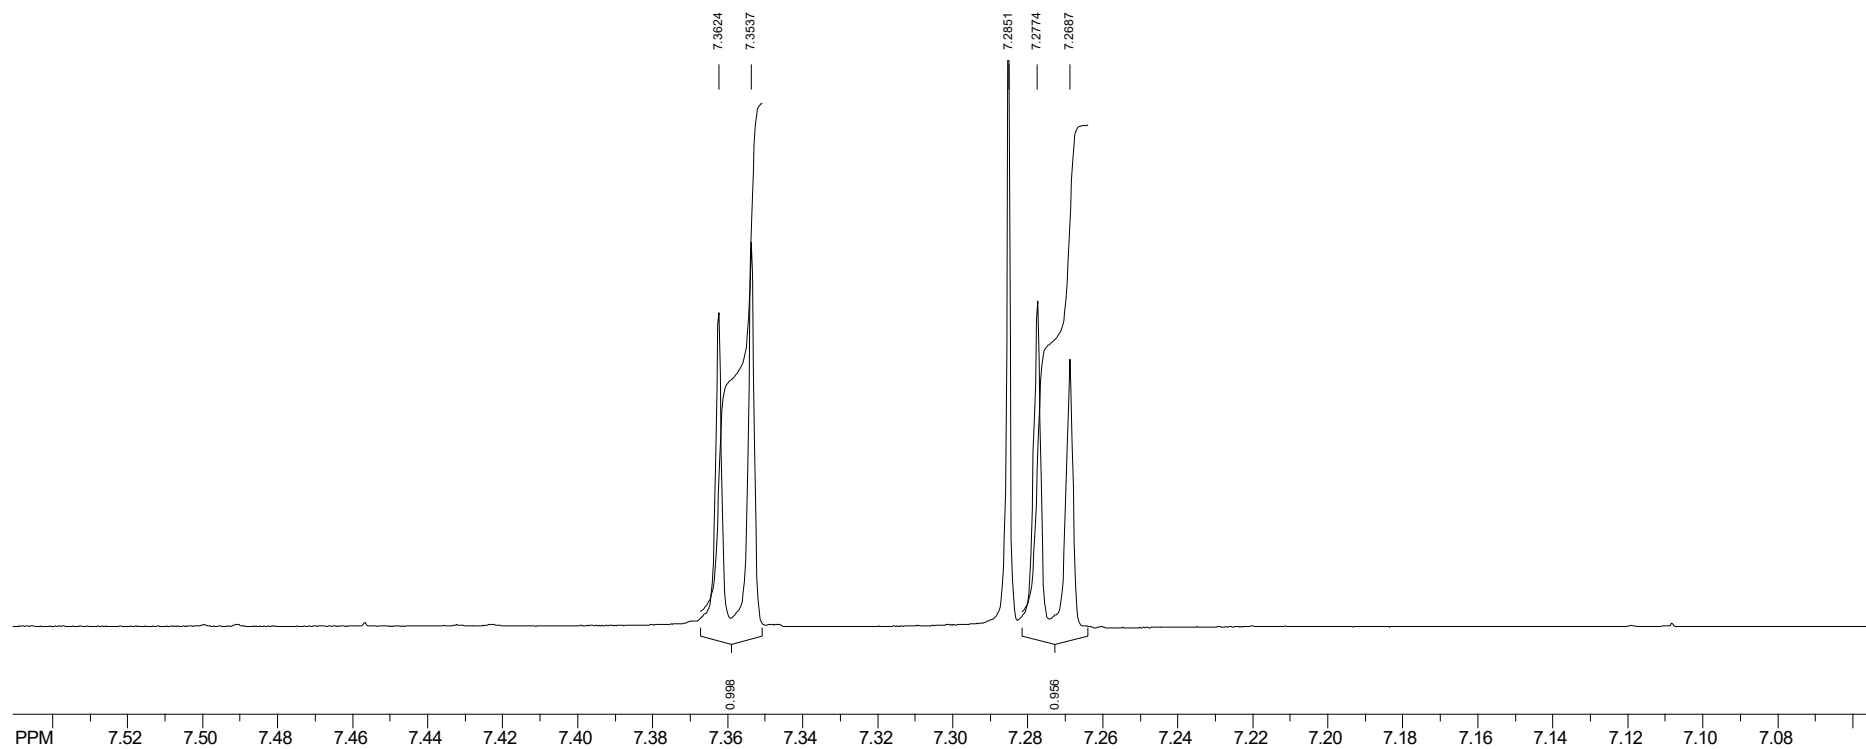

file: C:\Users\irena\Desktop\IDA SELEC\NMR spektri\SVI KONACNI NMR\Raw data\_NMR\icaleta-2023-02-01\_30-ZG6 spoj 37P3 1H10fid exp1 <zg30>  
 transmitter freq.: 600.135401 MHz  
 time domain size: 131072 points  
 width: 12019.23 Hz = 20.027532 ppm = 0.091699 Hz/pt  
 number of scans: 64

freq. of 0 ppm: 600.130000 MHz  
 processed size: 65536 complex points  
 LB: 0.000 GB: 0.0000

**Figure S56.** Aromatic part of the  $^1\text{H}$  NMR spectrum ( $\text{CDCl}_3$ ) of compound **18**.

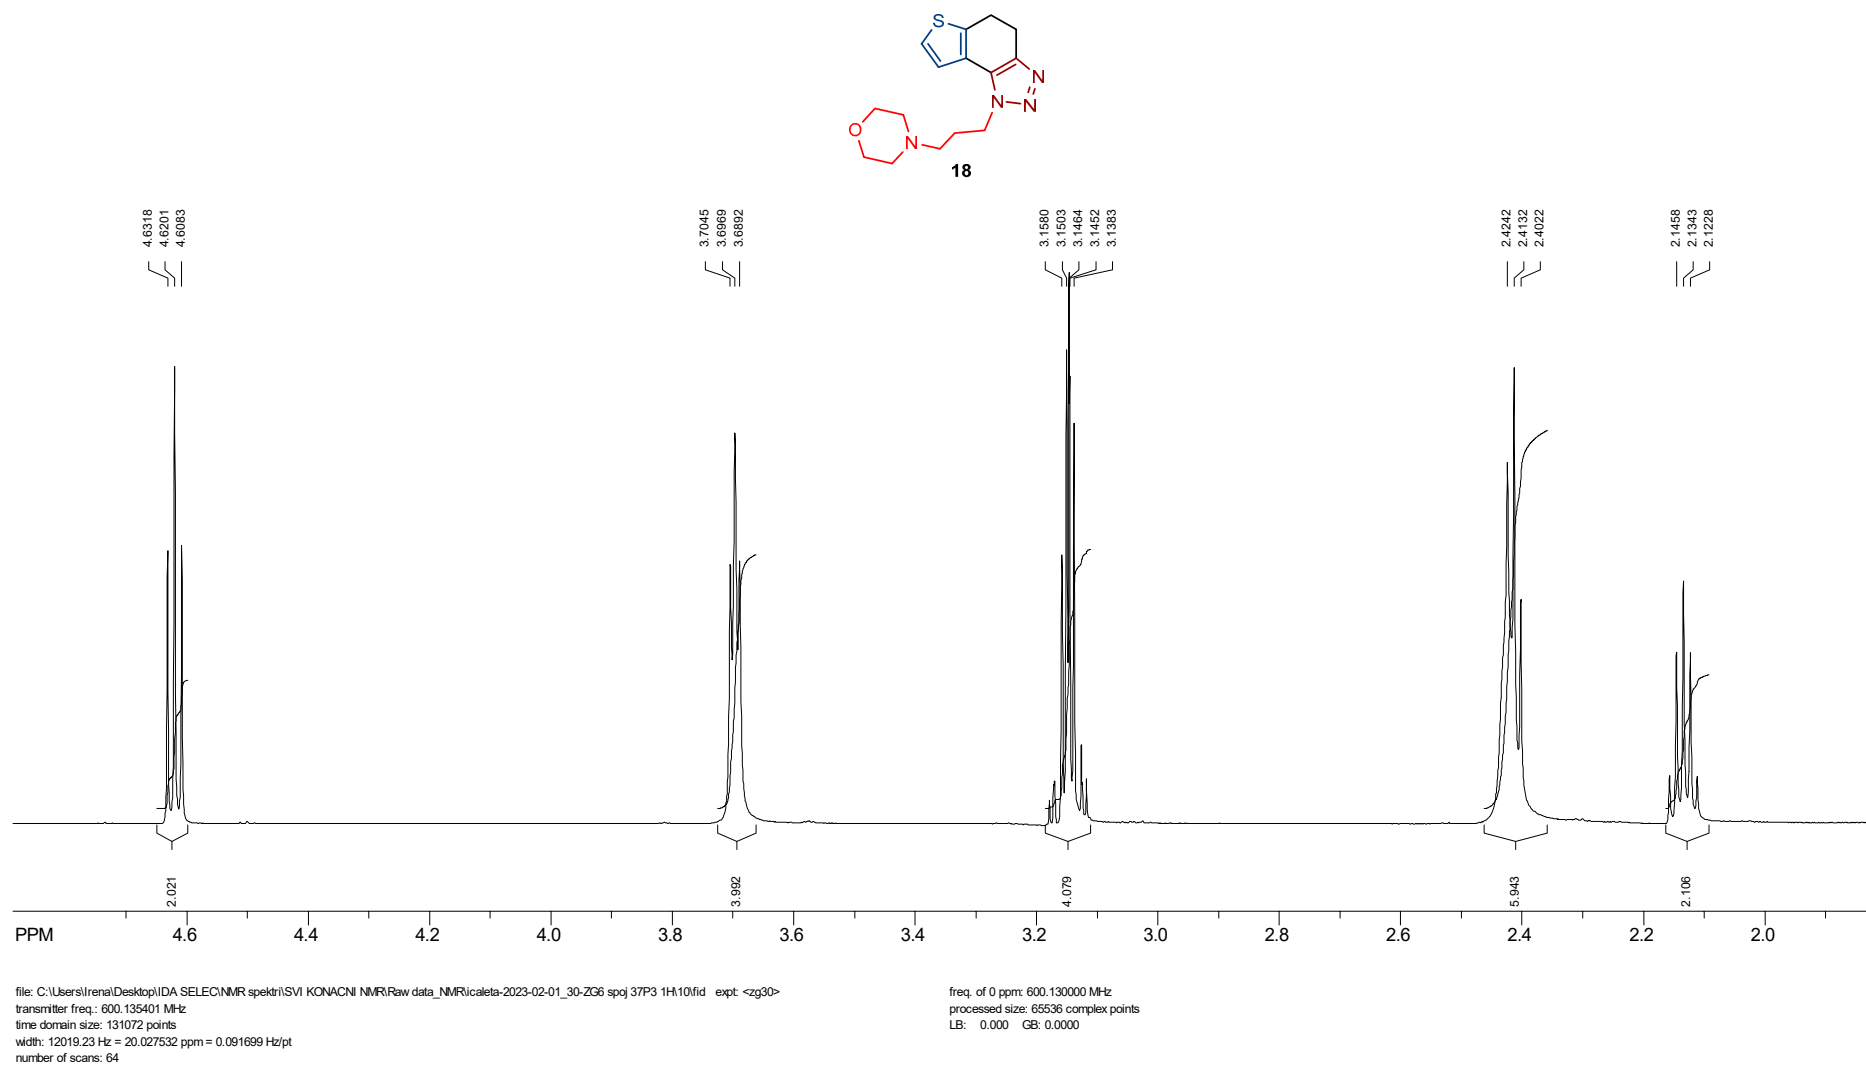

**Figure S57.** Aliphatic part of the  $^1\text{H}$  NMR spectrum ( $\text{CDCl}_3$ ) of compound **18**.





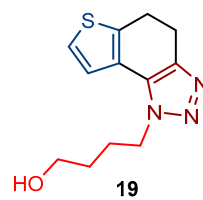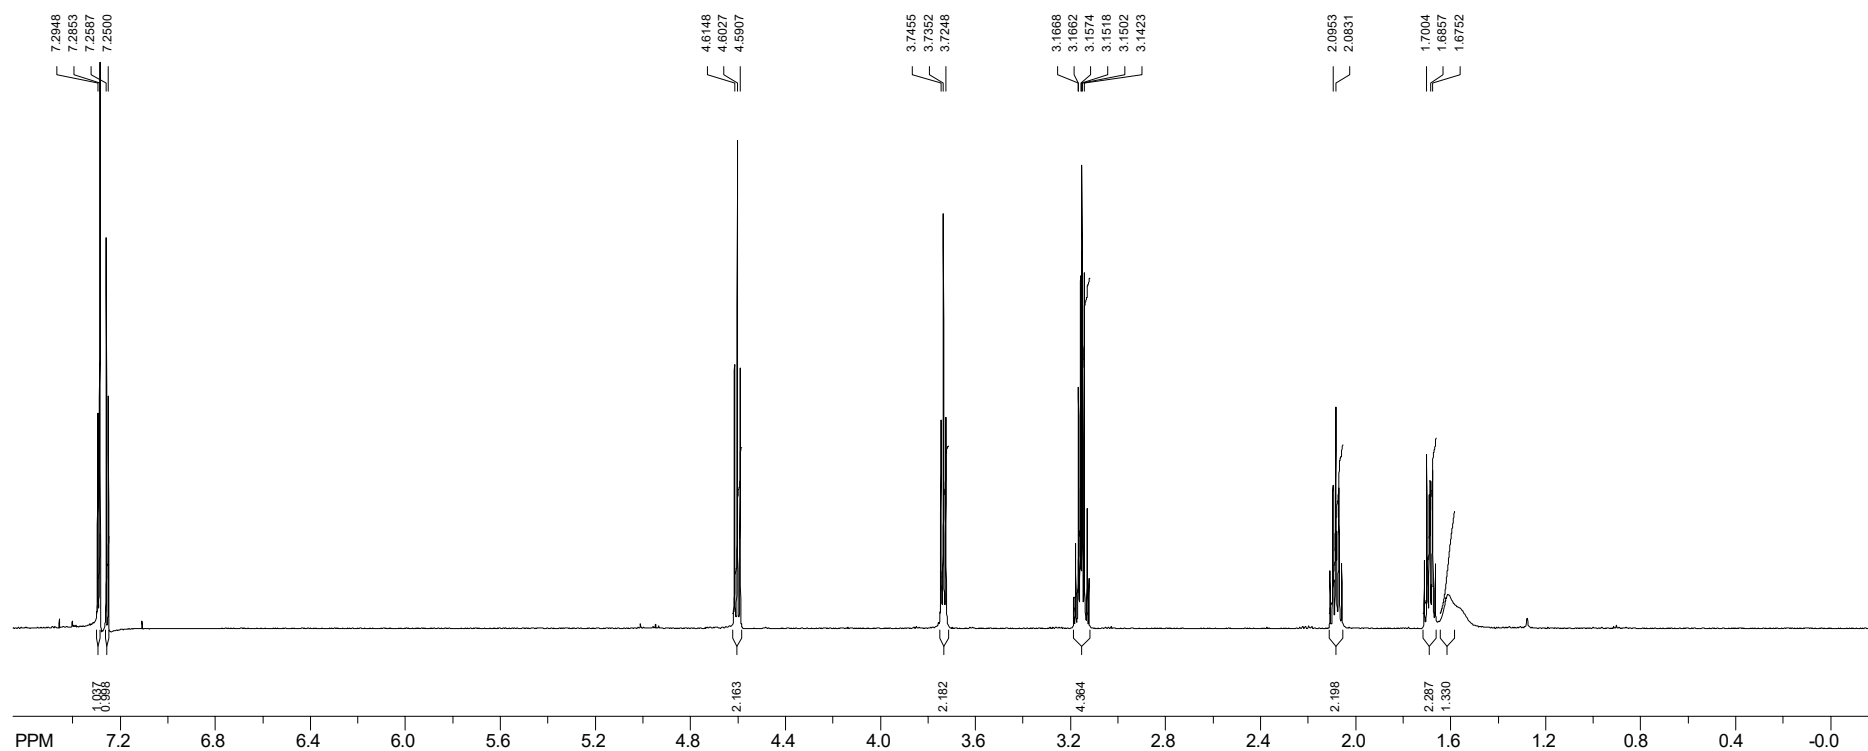

file: C:\Users\irena\Desktop\JMS II 2023\IDA SELEC\NMR spektri\SVI KONACNI NMR\NMR KONACNO ZA KORISTITI\Raw Data\_NMR\FID2172-031110.fid expt: <zg30>  
 transmitter freq.: 600.135401 MHz  
 time domain size: 131072 points  
 width: 12019.23 Hz = 20.027532 ppm = 0.091699 Hz/pt  
 number of scans: 64

freq. of 0 ppm: 600.130000 MHz  
 processed size: 65536 complex points  
 LB: 0.000 GB: 0.0000

**Figure S59.**  $^1\text{H}$  NMR spectrum ( $\text{CDCl}_3$ ) of compound **19**.

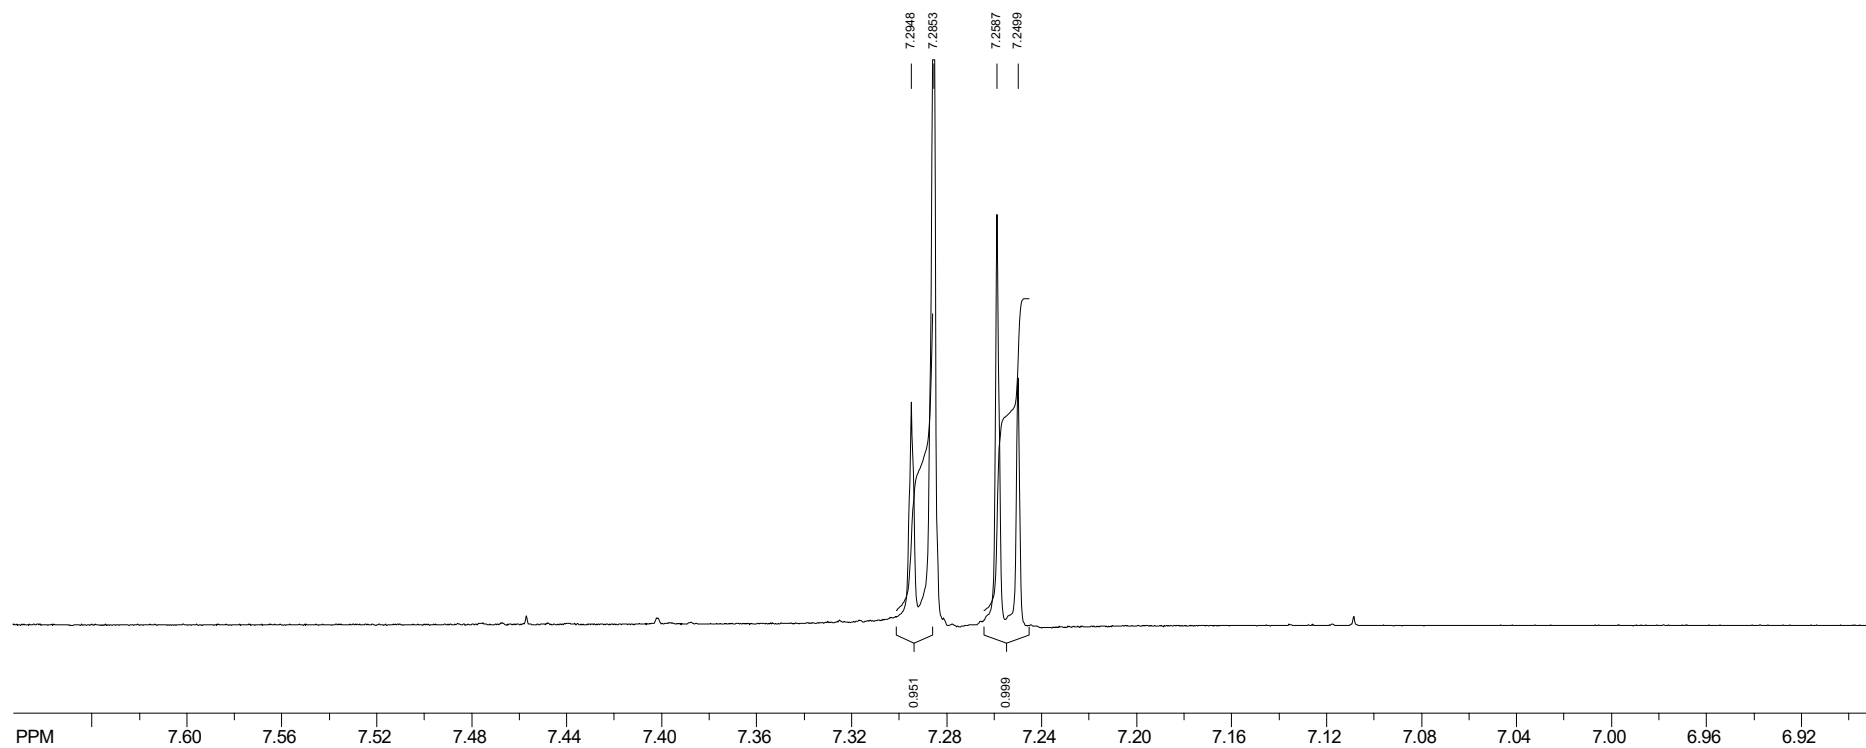

file: C:\Users\irena\Desktop\IDA SELEC\NMR spektri\SVI KONACNI NMR\Raw data\_NMR\icaleta-2023-02-01\_40-ZG6 spoj 31P2 1H10\fid exp: <zg30>  
 transmitter freq.: 600.135401 MHz  
 time domain size: 131072 points  
 width: 12019.23 Hz = 20.027532 ppm = 0.091699 Hz/pt  
 number of scans: 64

freq. of 0 ppm: 600.130000 MHz  
 processed size: 65536 complex points  
 LB: 0.000 GB: 0.0000

**Figure S60.** Aromatic part of the  $^1\text{H}$  NMR spectrum ( $\text{CDCl}_3$ ) of compound **19**.

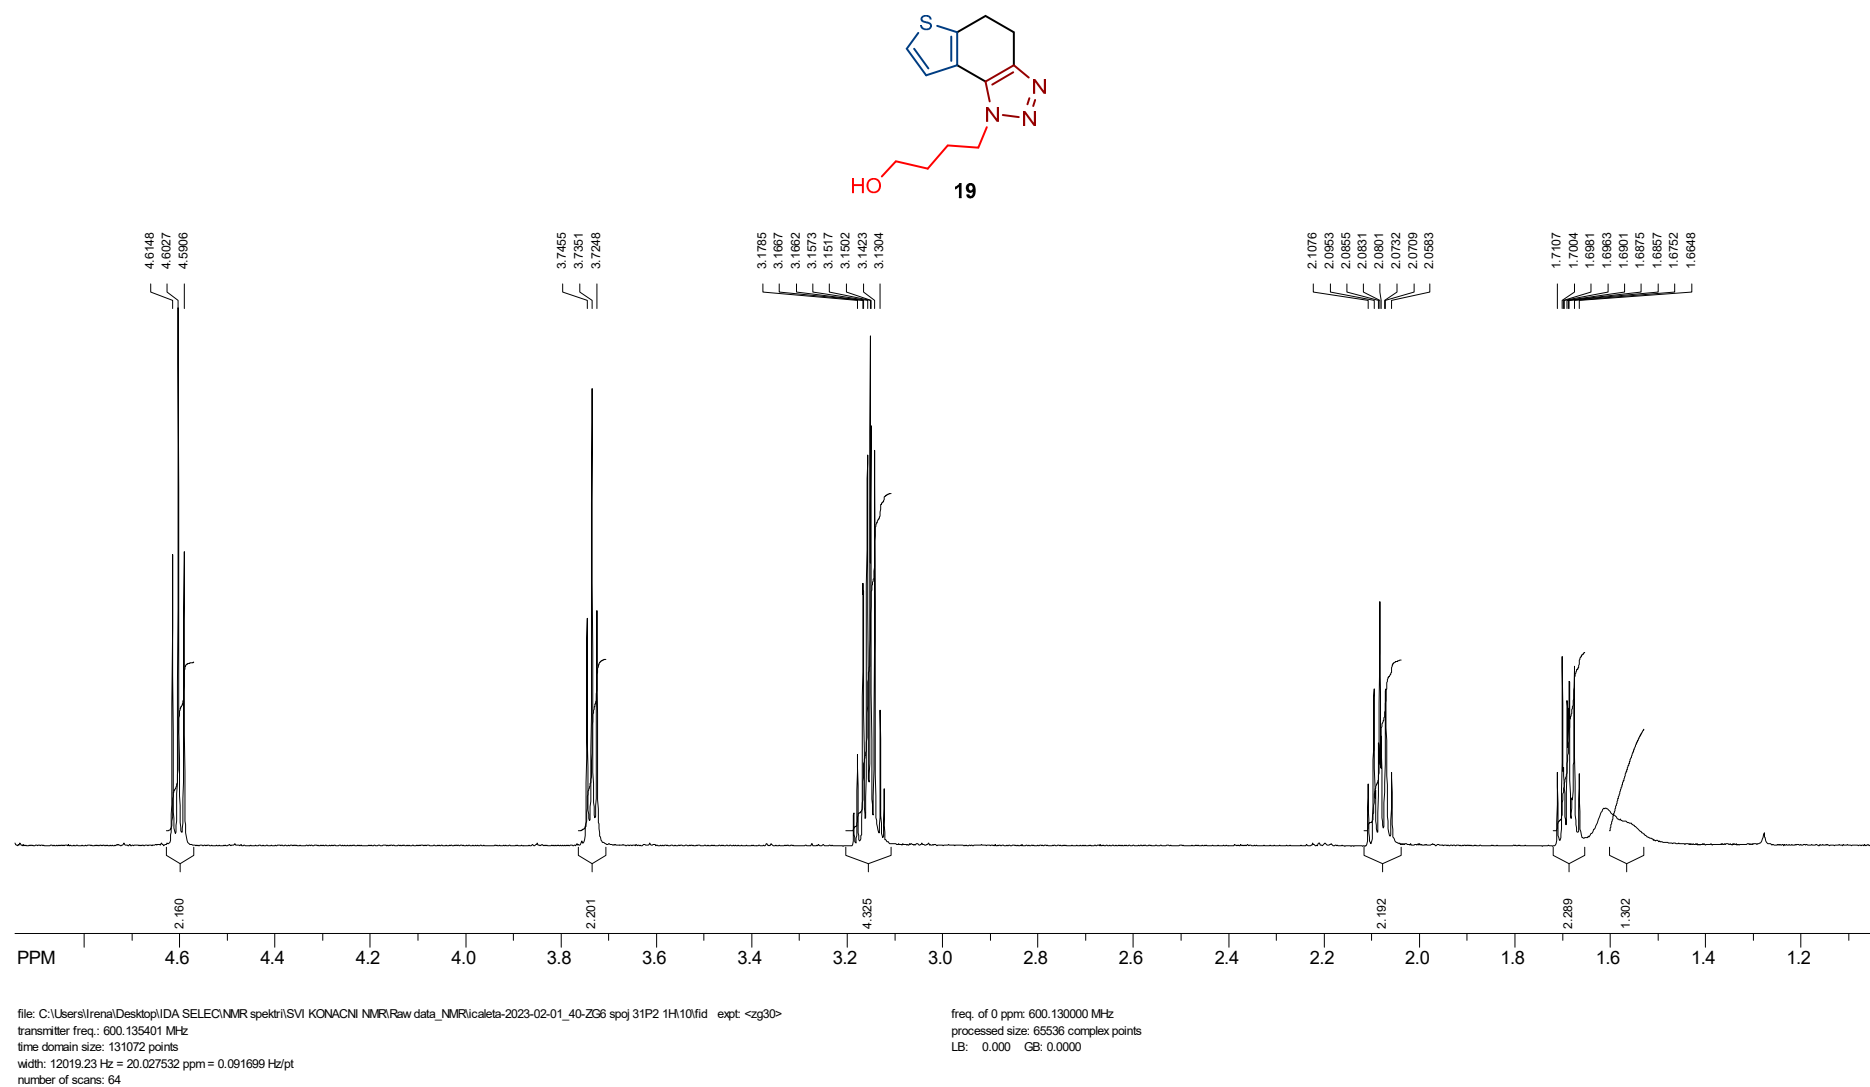

**Figure S61.** Aliphatic part of the  $^1\text{H}$  NMR spectrum ( $\text{CDCl}_3$ ) of compound **19**.



## 2. MS spectra and HRMS analyses of synthesized compounds

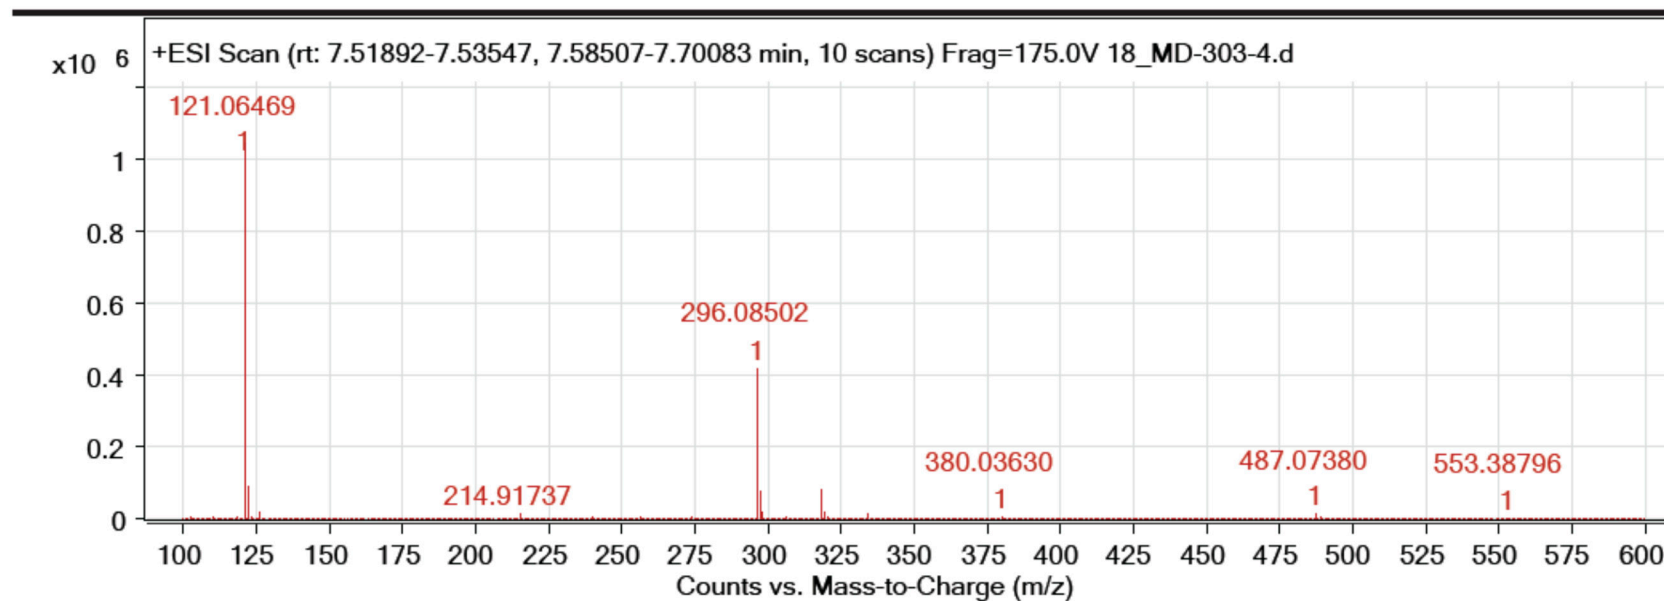

### Formula Calculator Results

| Formula        | Best | Mass      | Tgt Mass  | Diff (ppm) | Ion Species    | Score |
|----------------|------|-----------|-----------|------------|----------------|-------|
| C16 H13 N3 O S | True | 295.07774 | 295.07793 | 0.66       | C16 H14 N3 O S | 98.78 |

Figure S63. Mass spectrum and the result of the HRMS analysis for compound 3.

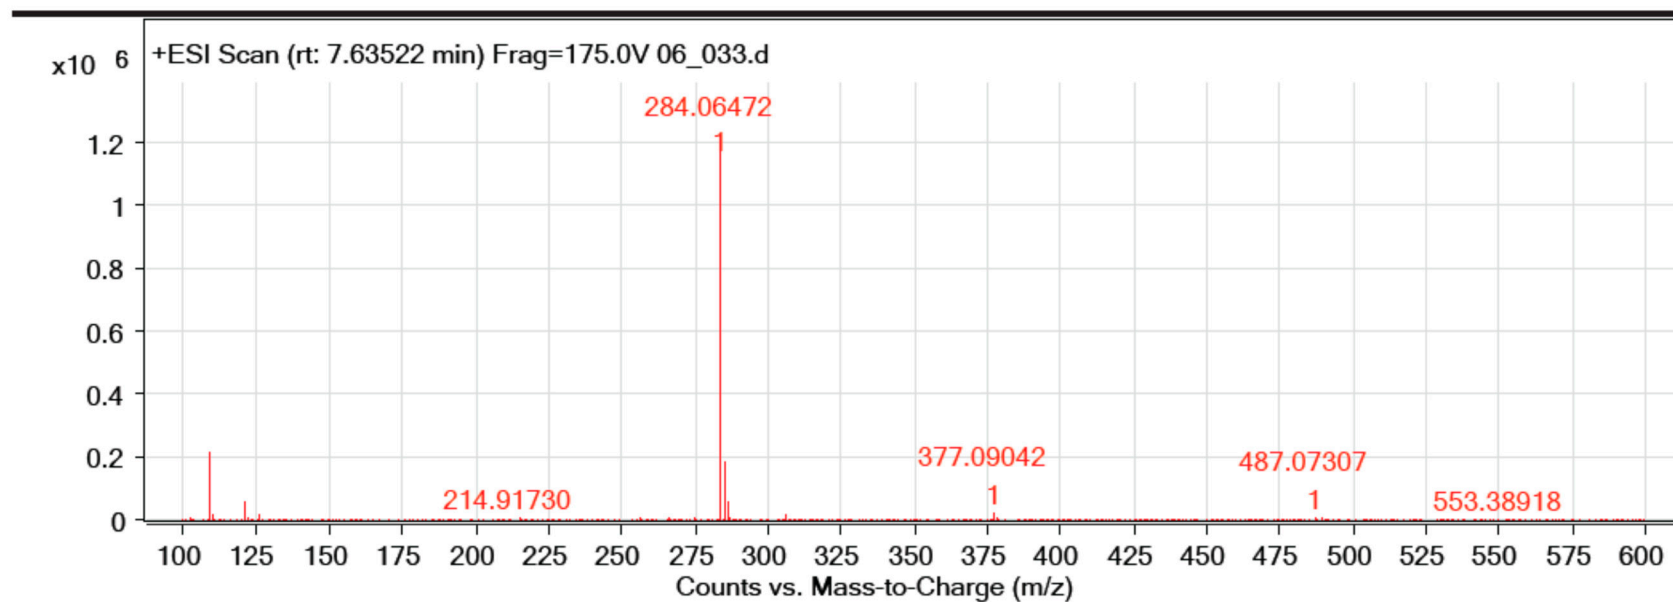

#### Formula Calculator Results

| Formula        | Best | Mass      | Tgt Mass  | Diff (ppm) | Ion Species    | Score |
|----------------|------|-----------|-----------|------------|----------------|-------|
| C15 H10 F N3 S | True | 283.05749 | 283.05795 | 1.6        | C15 H11 F N3 S | 97.27 |

**Figure S64.** Mass spectrum and the result of the HRMS analysis for compound **4**.

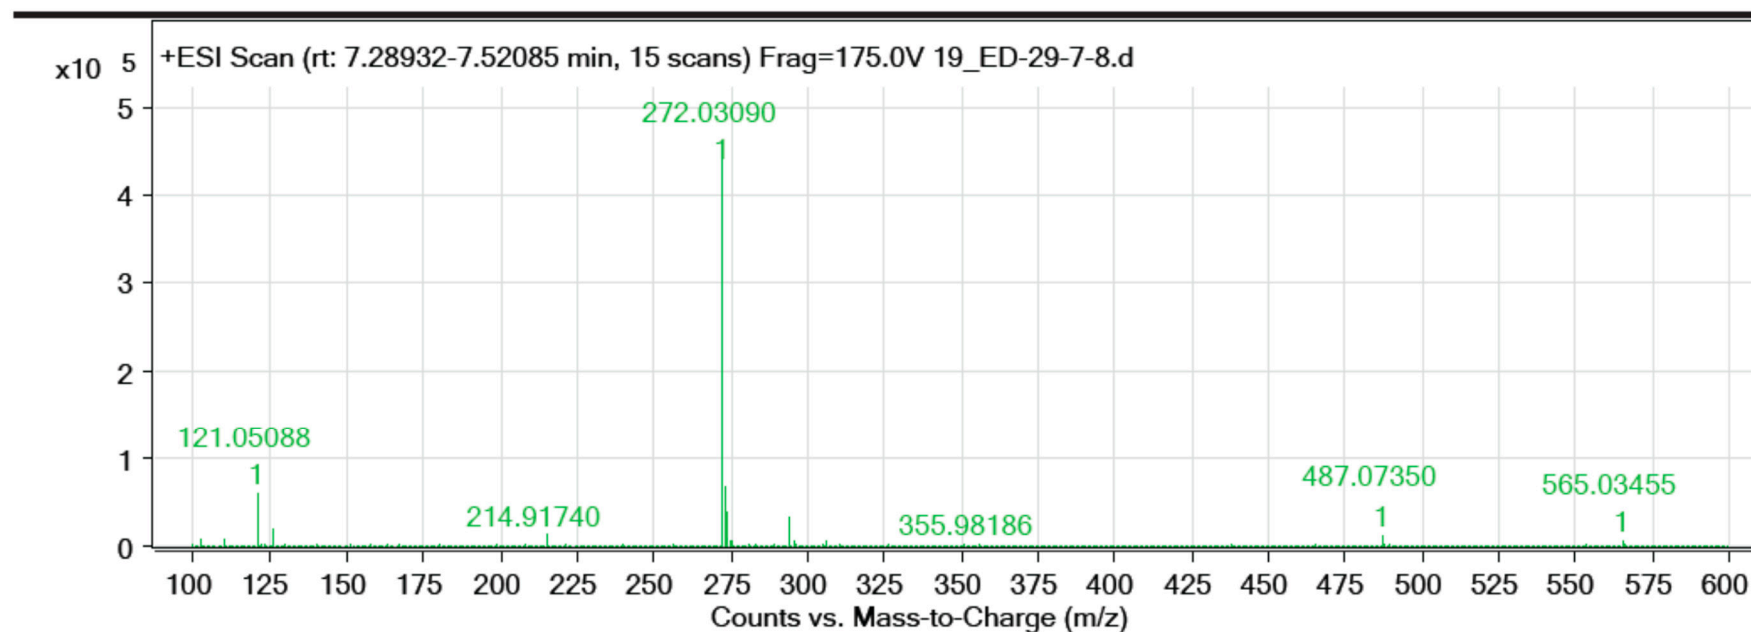

#### Formula Calculator Results

| Formula      | Best | Mass      | Tgt Mass  | Diff (ppm) | Ion Species   | Score |
|--------------|------|-----------|-----------|------------|---------------|-------|
| C13 H9 N3 S2 | True | 271.02361 | 271.02379 | 0.66       | C13 H10 N3 S2 | 97.99 |

**Figure S65.** Mass spectrum and the result of the HRMS analysis for compound **5**.

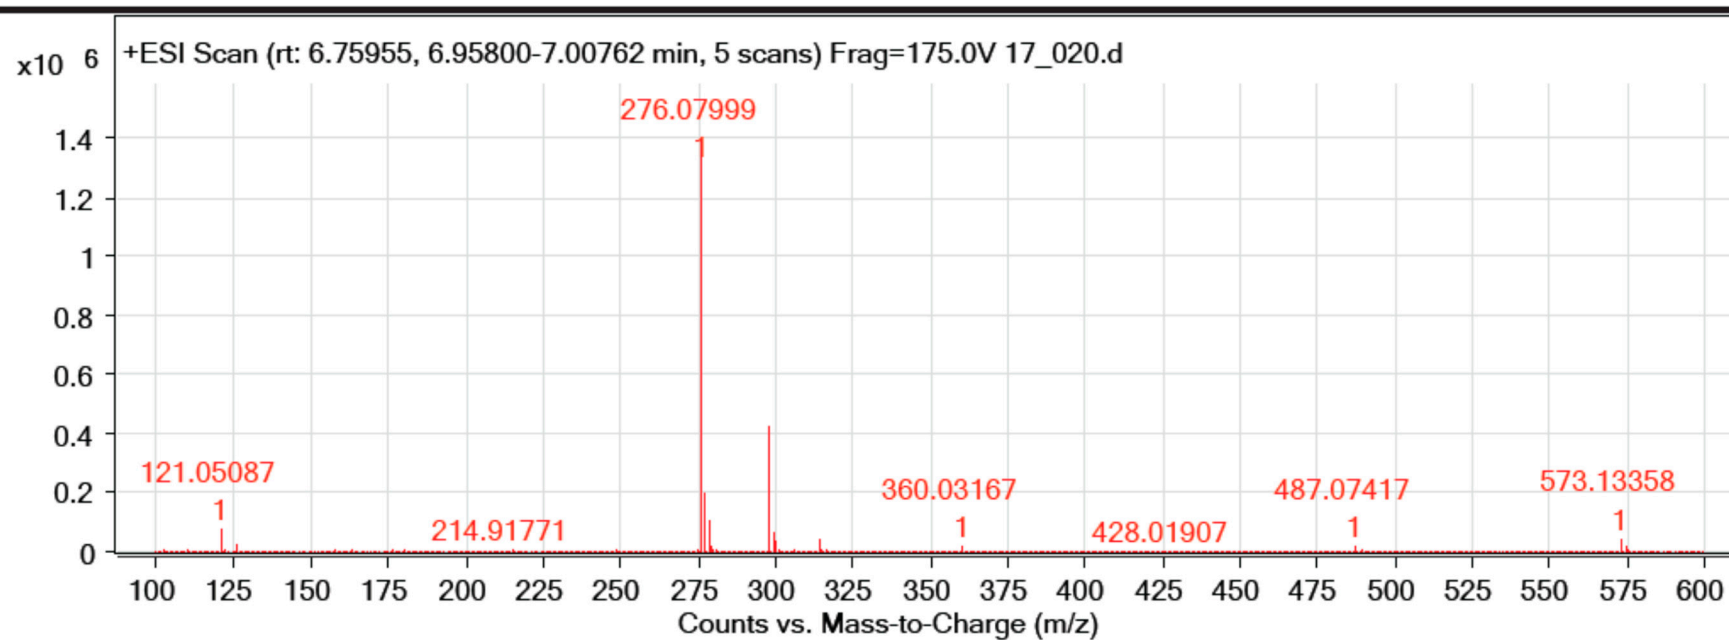

#### Formula Calculator Results

| Formula         | Best | Mass      | Tgt Mass  | Diff (ppm) | Ion Species     | Score |
|-----------------|------|-----------|-----------|------------|-----------------|-------|
| C13 H13 N3 O2 S | True | 275.07275 | 275.07285 | 0.35       | C13 H14 N3 O2 S | 92.17 |

Figure S66. Mass spectrum and the result of the HRMS analysis for compound 6.



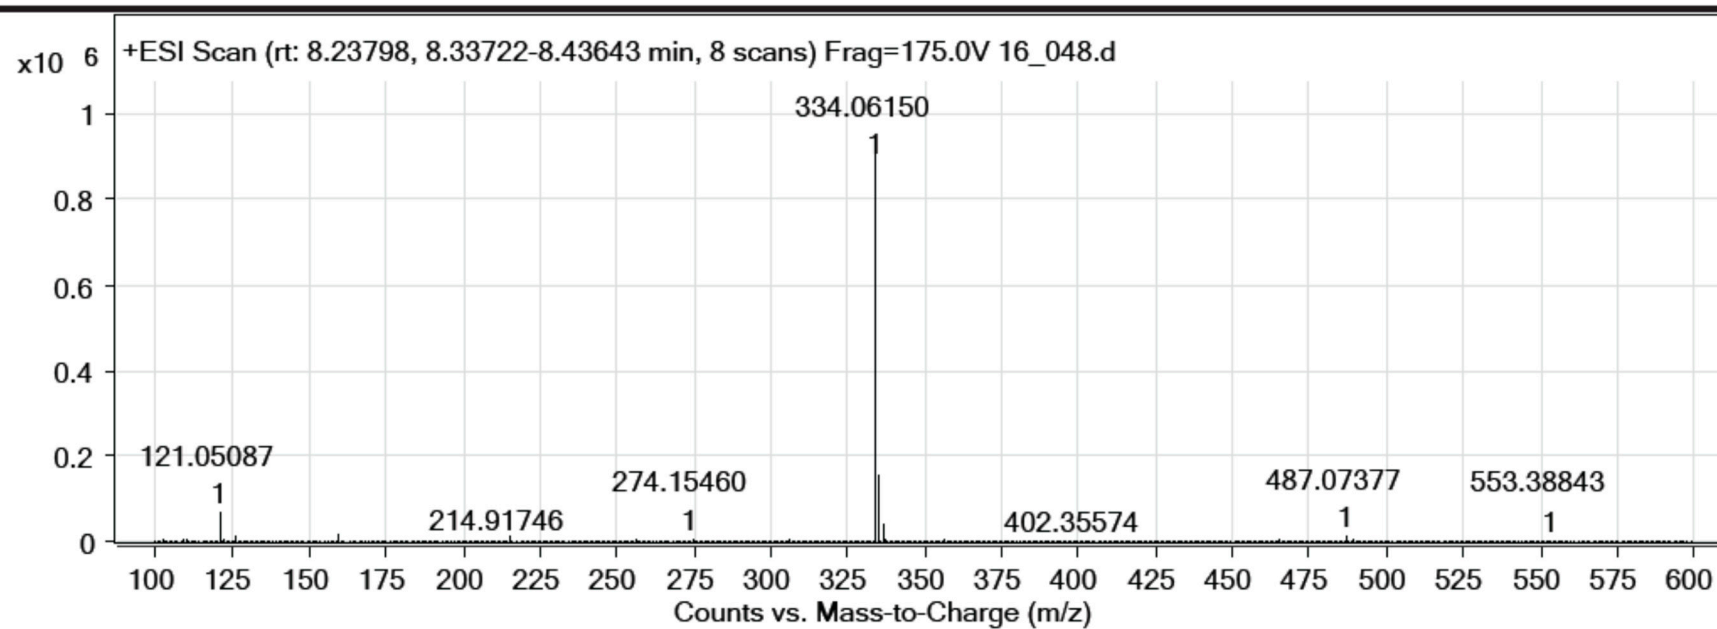

#### Formula Calculator Results

| Formula         | Best | Mass      | Tgt Mass  | Diff (ppm) | Ion Species     | Score |
|-----------------|------|-----------|-----------|------------|-----------------|-------|
| C16 H10 F3 N3 S | True | 333.05423 | 333.05475 | 1.57       | C16 H11 F3 N3 S | 96.49 |

**Figure S67.** Mass spectrum and the result of the HRMS analysis for compound 7.

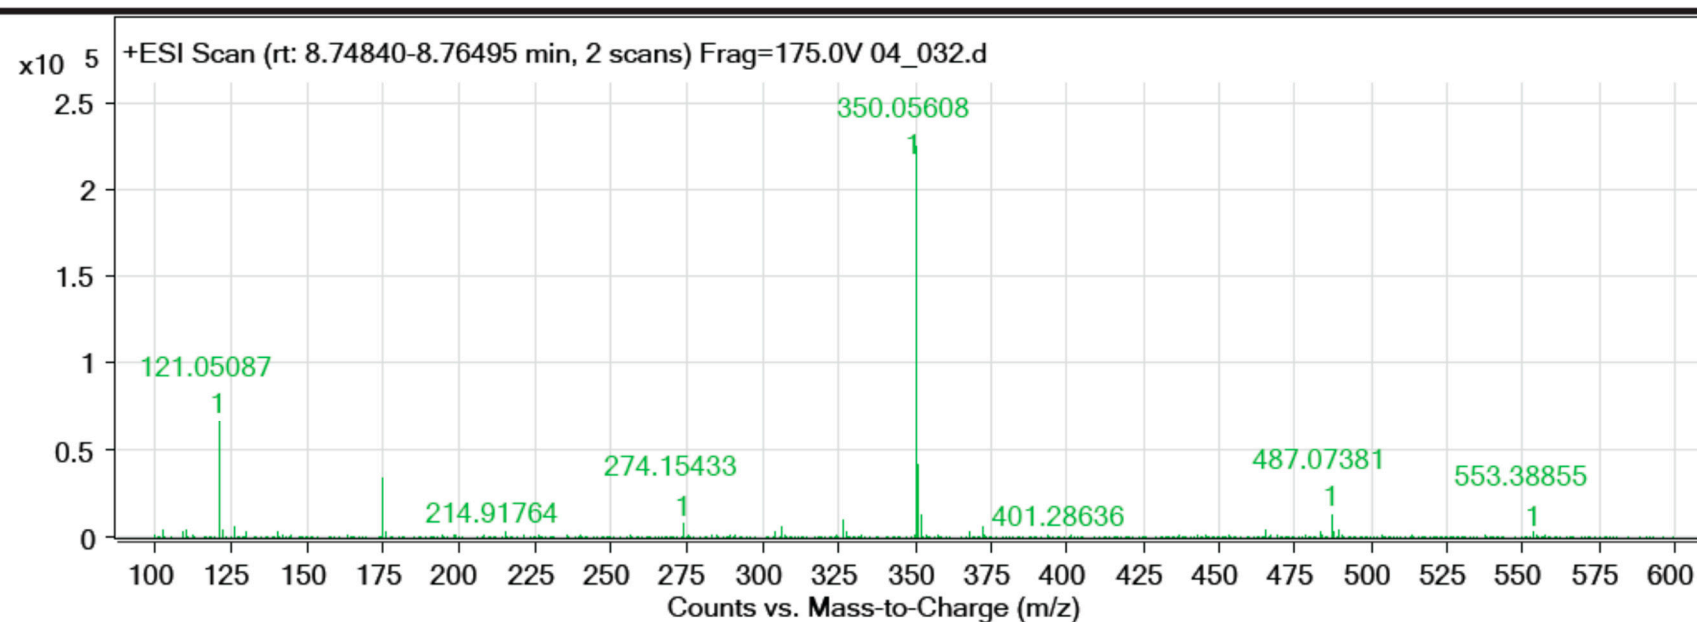

#### Formula Calculator Results

| Formula           | Best | Mass      | Tgt Mass  | Diff (ppm) | Ion Species       | Score |
|-------------------|------|-----------|-----------|------------|-------------------|-------|
| C16 H10 F3 N3 O S | True | 349.04885 | 349.04967 | 2.33       | C16 H11 F3 N3 O S | 97.62 |

**Figure S68.** Mass spectrum and the result of the HRMS analysis for compound **8**.

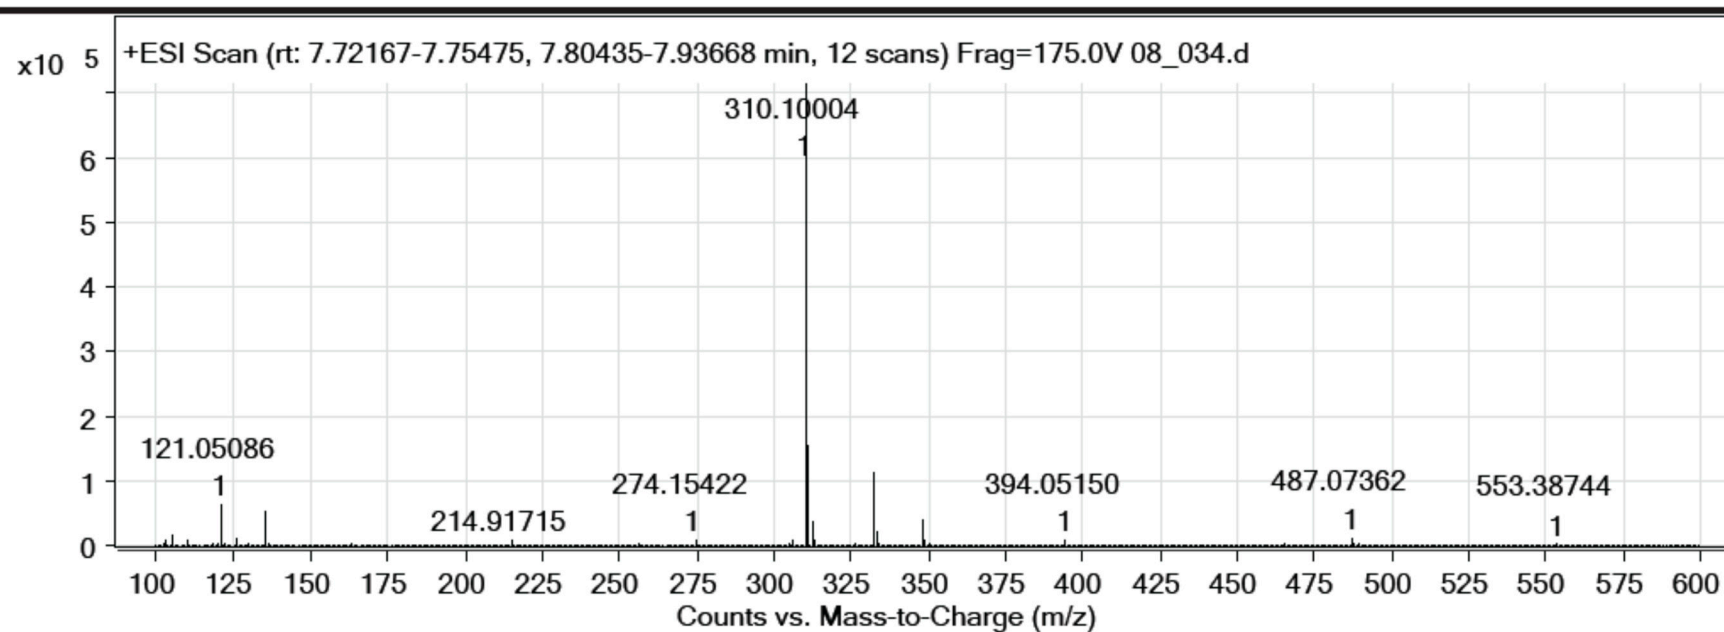

#### Formula Calculator Results

| Formula        | Best | Mass     | Tgt Mass  | Diff (ppm) | Ion Species    | Score |
|----------------|------|----------|-----------|------------|----------------|-------|
| C17 H15 N3 O S | True | 309.0928 | 309.09358 | 2.53       | C17 H16 N3 O S | 95.06 |

Figure S69. Mass spectrum and the result of the HRMS analysis for compound 9.

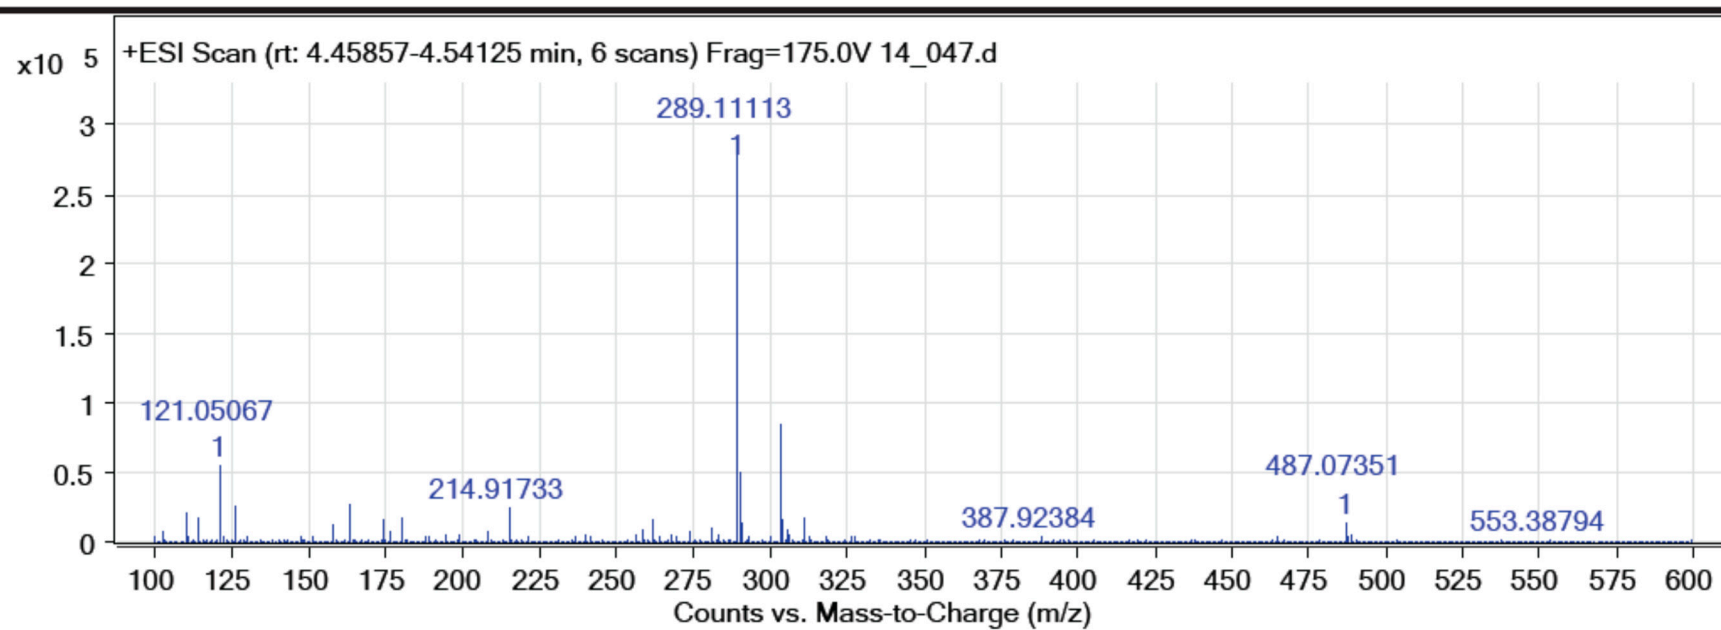

**Formula Calculator Results**

| Formula        | Best | Mass      | Tgt Mass  | Diff (ppm) | Ion Species    | Score |
|----------------|------|-----------|-----------|------------|----------------|-------|
| C14 H16 N4 O S | True | 288.10402 | 288.10448 | 1.62       | C14 H17 N4 O S | 96.71 |

**Figure S70.** Mass spectrum and the result of the HRMS analysis for compound **10**.

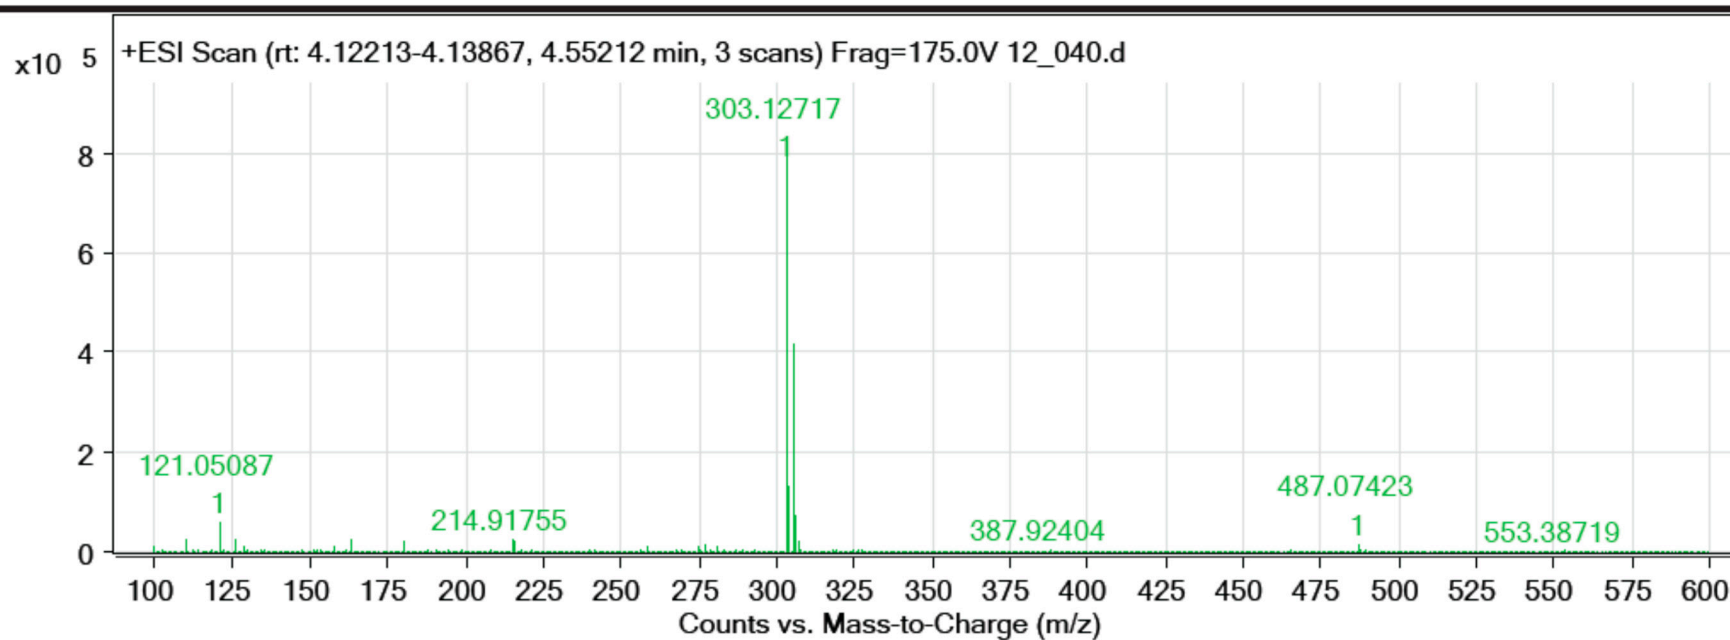

#### Formula Calculator Results

| Formula                                            | Best | Mass      | Tgt Mass  | Diff (ppm) | Ion Species                                        | Score |
|----------------------------------------------------|------|-----------|-----------|------------|----------------------------------------------------|-------|
| C <sub>15</sub> H <sub>18</sub> N <sub>4</sub> O S | True | 302.11994 | 302.12013 | 0.62       | C <sub>15</sub> H <sub>19</sub> N <sub>4</sub> O S | 95.53 |

**Figure S71.** Mass spectrum and the result of the HRMS analysis for compound **11**.

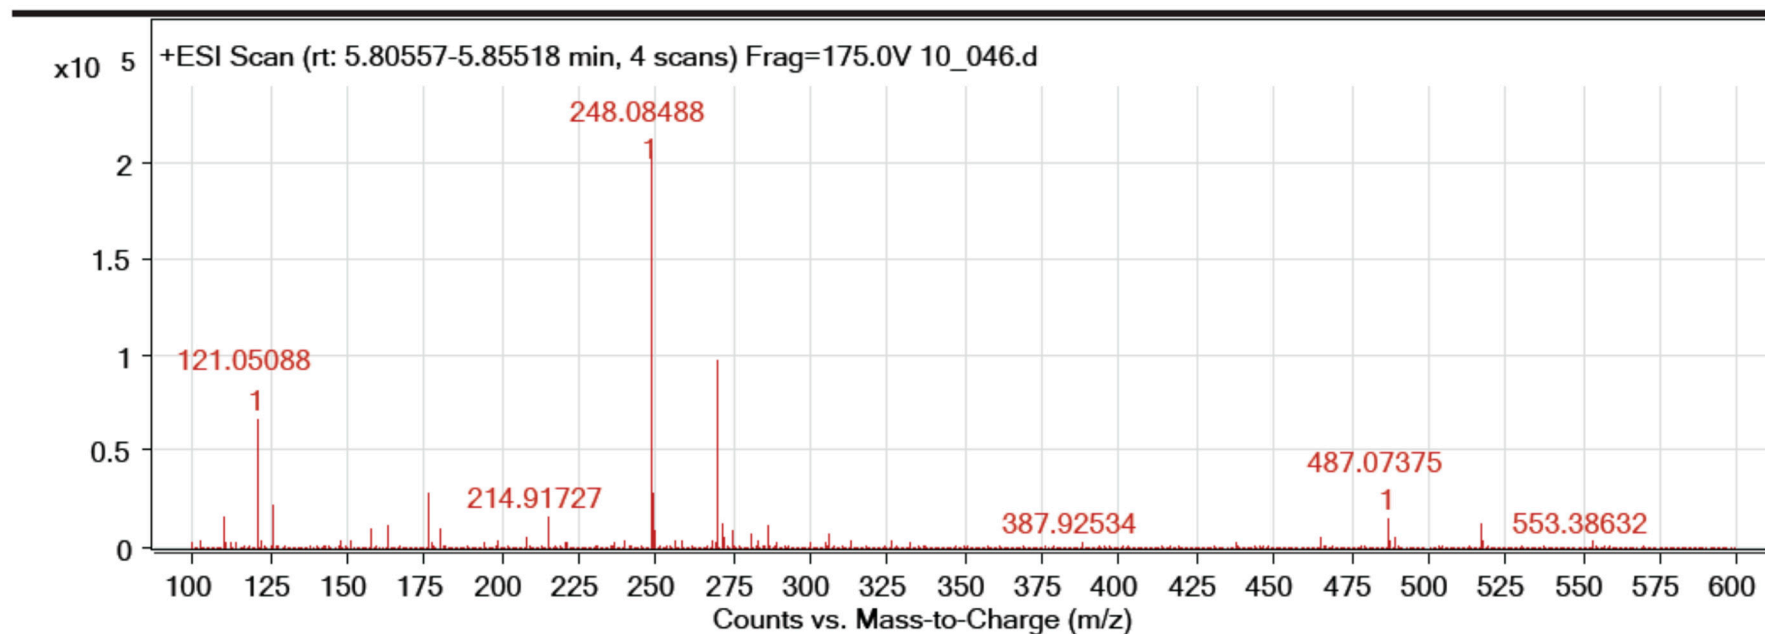

#### Formula Calculator Results

| Formula        | Best | Mass      | Tgt Mass  | Diff (ppm) | Ion Species    | Score |
|----------------|------|-----------|-----------|------------|----------------|-------|
| C12 H13 N3 O S | True | 247.07759 | 247.07793 | 1.38       | C12 H14 N3 O S | 98.63 |

**Figure S72.** Mass spectrum and the result of the HRMS analysis for compound **12**.

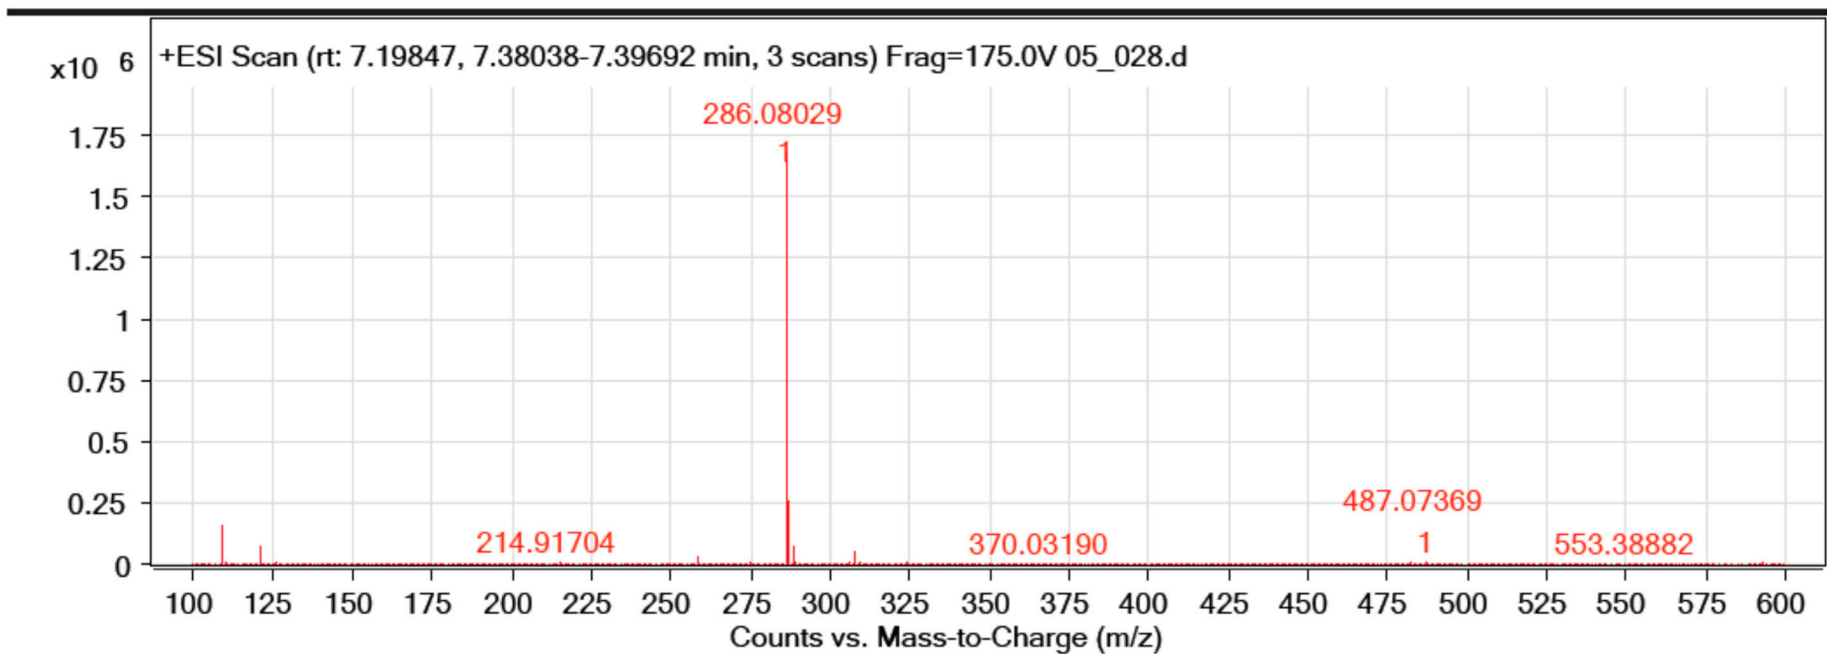

#### Formula Calculator Results

| Formula        | Best | Mass      | Tgt Mass | Diff (ppm) | Ion Species    | Score |
|----------------|------|-----------|----------|------------|----------------|-------|
| C15 H12 F N3 S | True | 285.07306 | 285.0736 | 1.88       | C15 H13 F N3 S | 96.38 |

**Figure S73.** Mass spectrum and the result of the HRMS analysis for compound **13**.

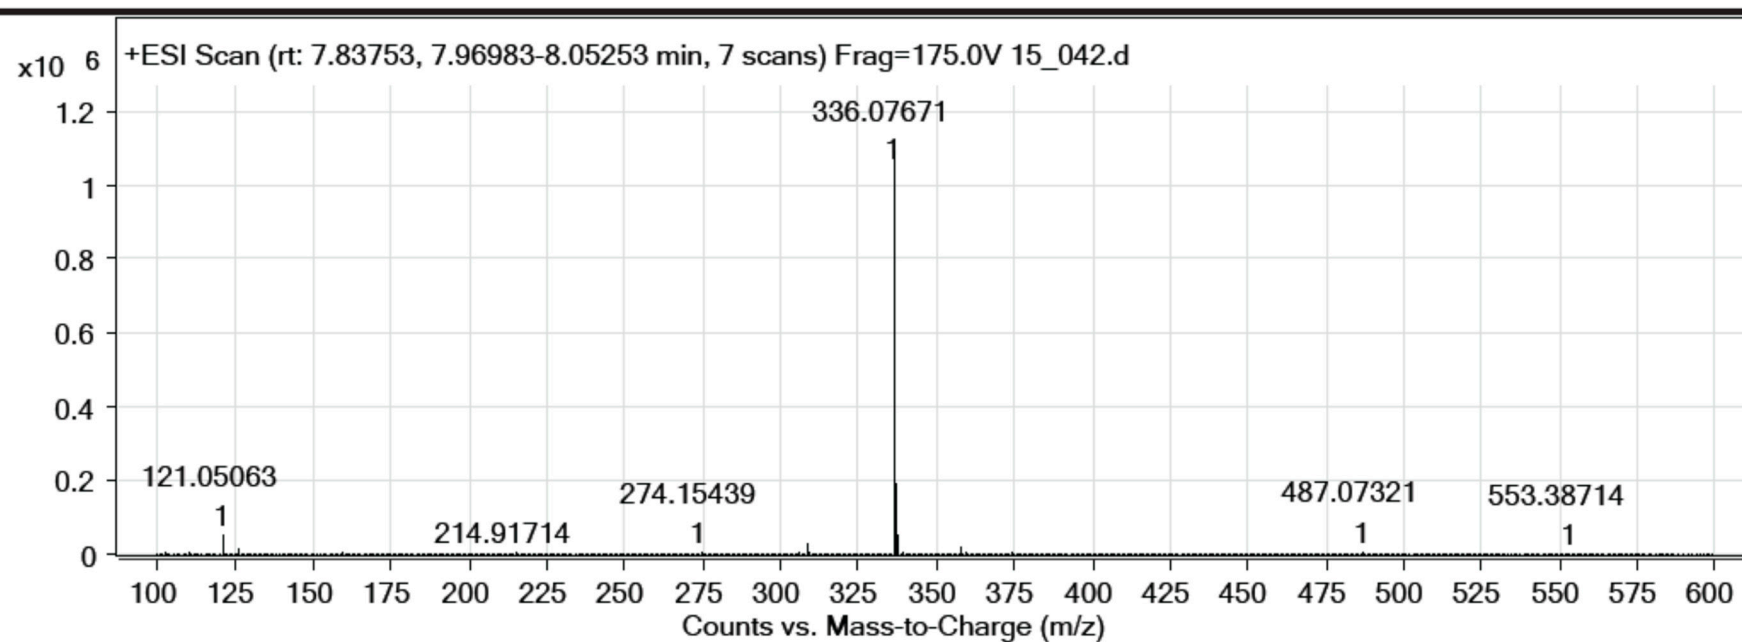

#### Formula Calculator Results

| Formula         | Best | Mass      | Tgt Mass | Diff (ppm) | Ion Species     | Score |
|-----------------|------|-----------|----------|------------|-----------------|-------|
| C16 H12 F3 N3 S | True | 335.06947 | 335.0704 | 2.78       | C16 H13 F3 N3 S | 95.91 |

**Figure S74.** Mass spectrum and the result of the HRMS analysis for compound **14**.



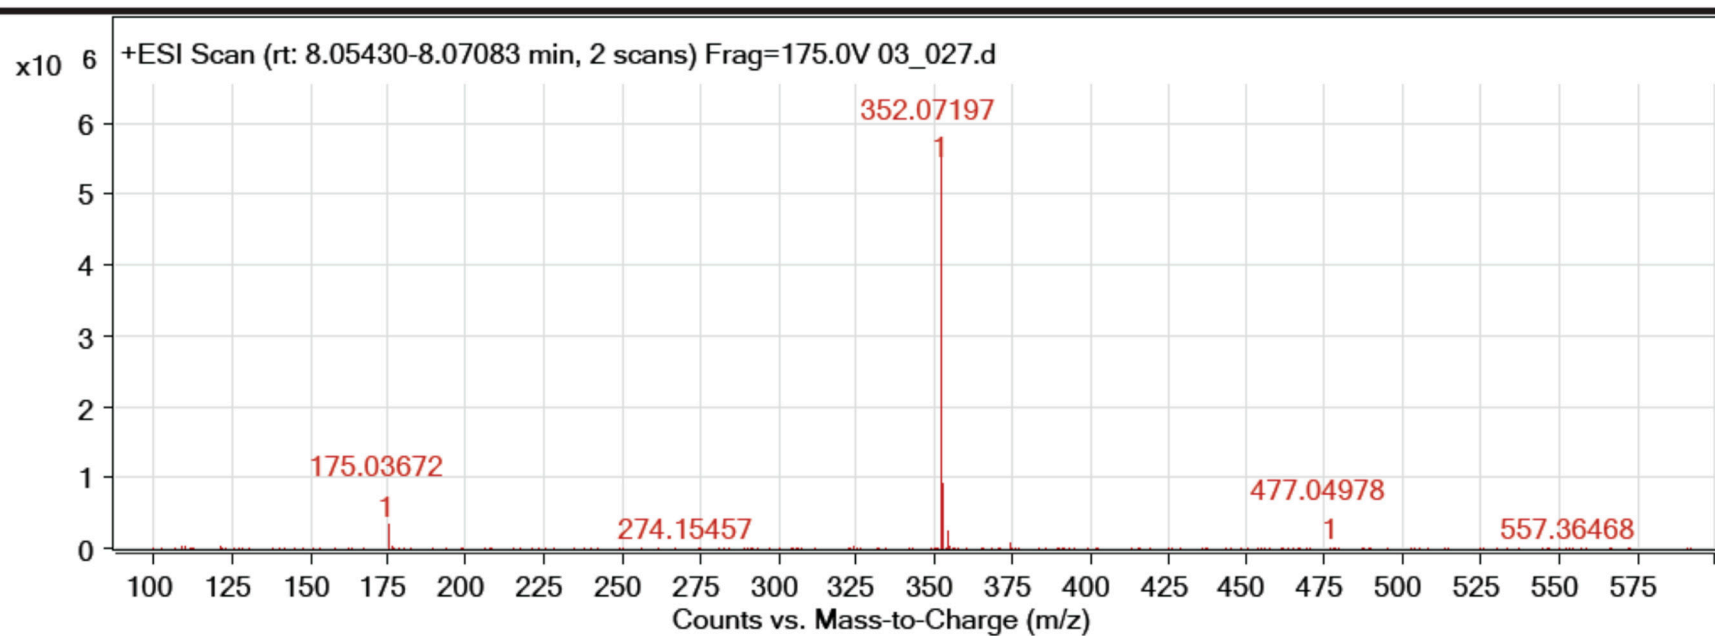

#### Formula Calculator Results

| Formula           | Best | Mass      | Tgt Mass  | Diff (ppm) | Ion Species       | Score |
|-------------------|------|-----------|-----------|------------|-------------------|-------|
| C16 H11 F3 N3 O S | True | 350.05555 | 350.05749 | 5.54       | C16 H12 F3 N3 O S | 37.49 |
| C16 H12 F3 N3 O S | True | 351.06471 | 351.06532 | 1.73       | C16 H13 F3 N3 O S | 95.48 |

**Figure S75.** Mass spectrum and the result of the HRMS analysis for compound **15**.

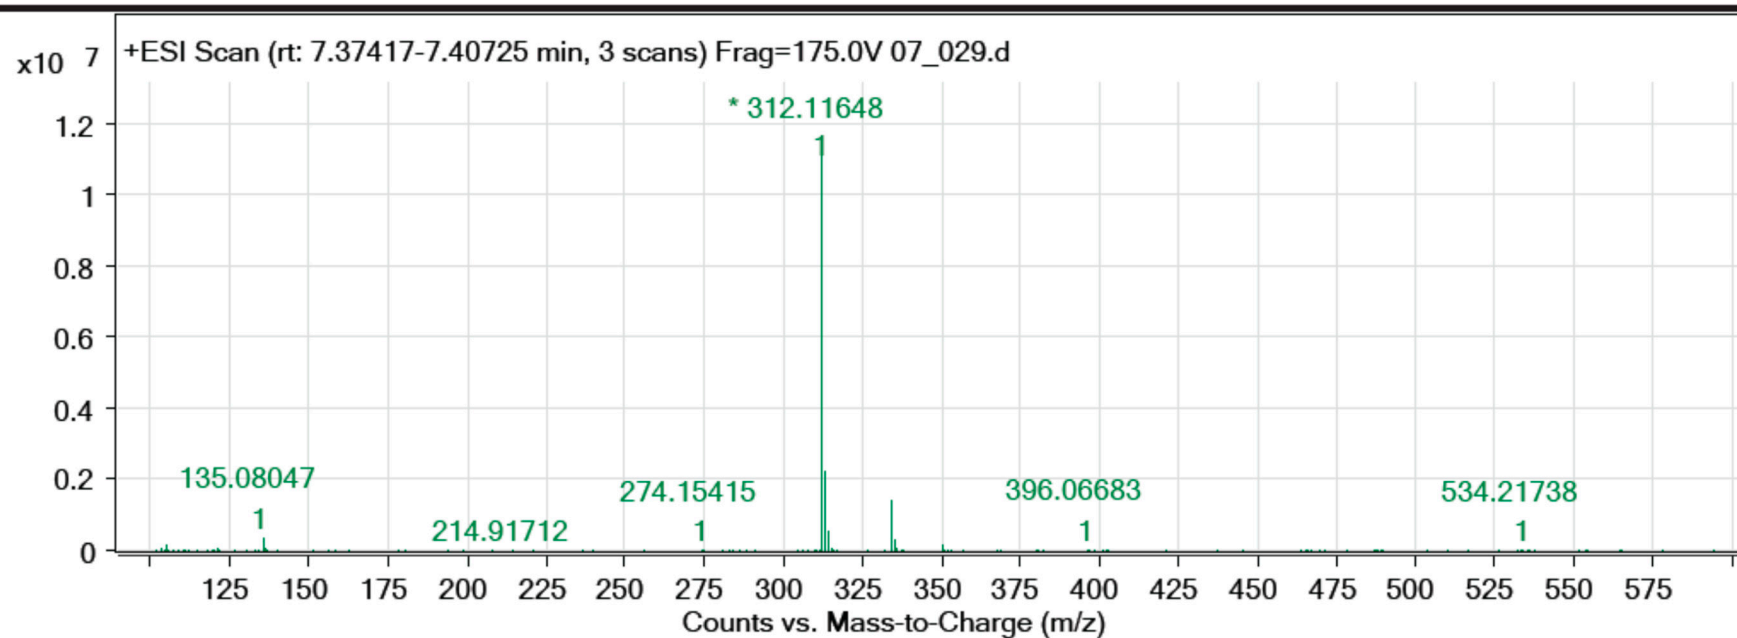

**Formula Calculator Results**

| Formula        | Best | Mass      | Tgt Mass  | Diff (ppm) | Ion Species    | Score |
|----------------|------|-----------|-----------|------------|----------------|-------|
| C17 H17 N3 O S | True | 311.10905 | 311.10923 | 0.6        | C17 H18 N3 O S | 97.23 |

**Figure S76.** Mass spectrum and the result of the HRMS analysis for compound **16**.

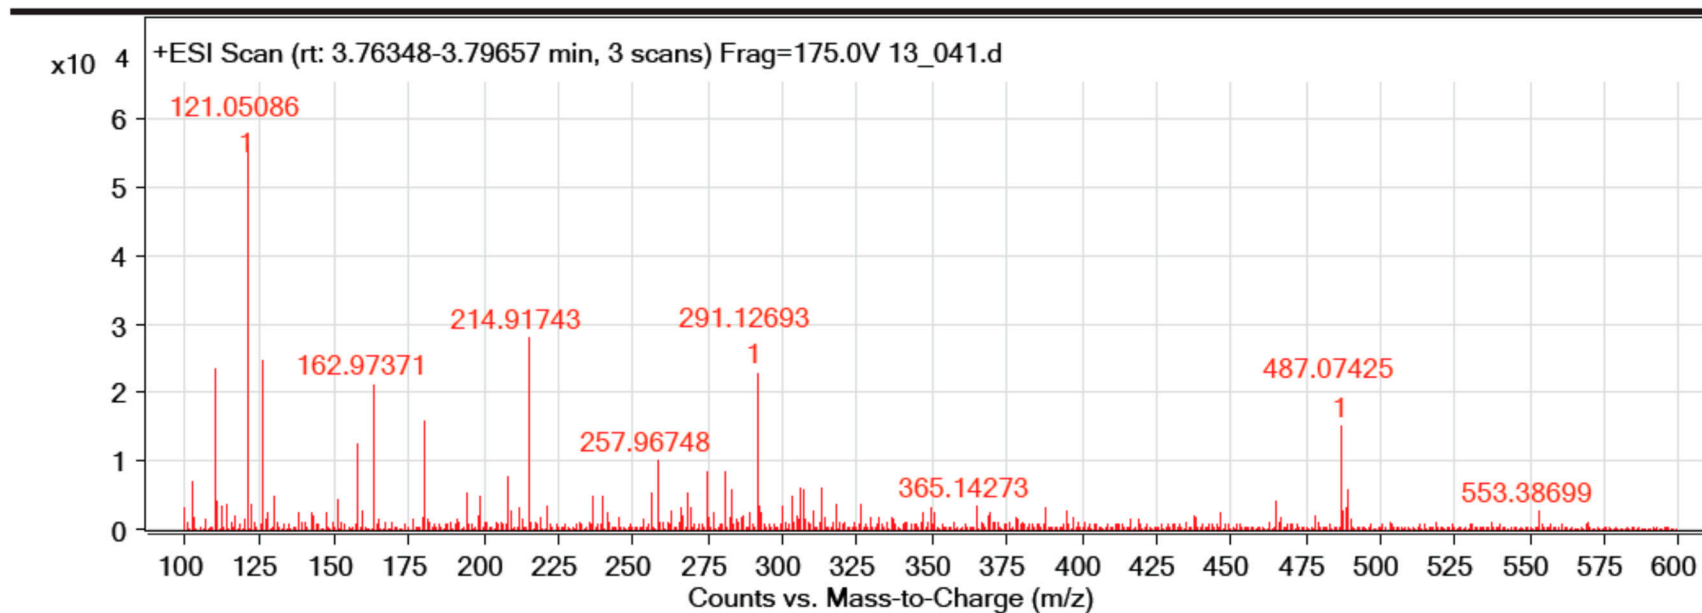

#### Formula Calculator Results

| Formula        | Best | Mass      | Tgt Mass  | Diff (ppm) | Ion Species    | Score |
|----------------|------|-----------|-----------|------------|----------------|-------|
| C14 H18 N4 O S | True | 290.11972 | 290.12013 | 1.4        | C14 H19 N4 O S | 95.24 |

**Figure S77.** Mass spectrum and the result of the HRMS analysis for compound **17**.

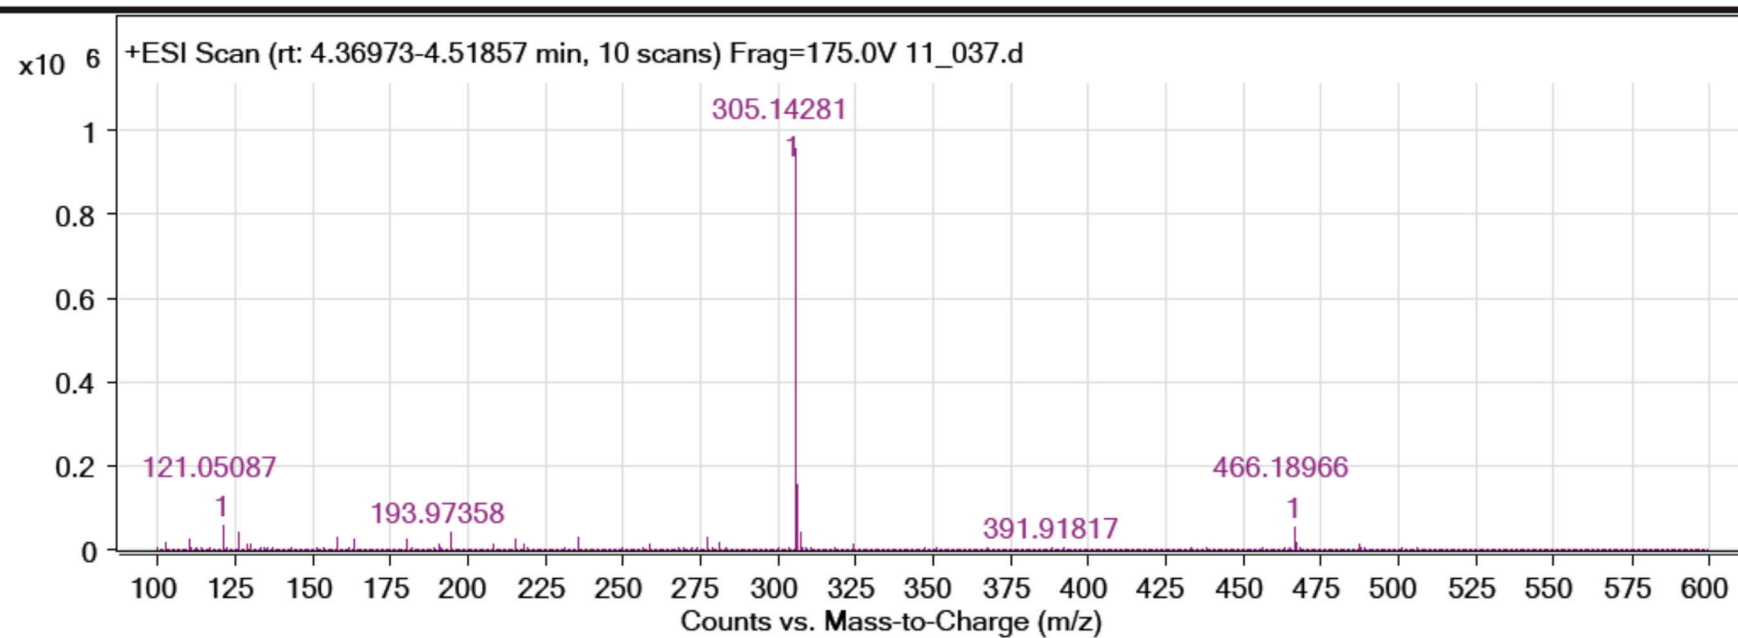

**Formula Calculator Results**

| Formula        | Best | Mass      | Tgt Mass  | Diff (ppm) | Ion Species    | Score |
|----------------|------|-----------|-----------|------------|----------------|-------|
| C15 H20 N4 O S | True | 304.13556 | 304.13578 | 0.72       | C15 H21 N4 O S | 97.77 |

**Figure S78.** Mass spectrum and the result of the HRMS analysis for compound **18**.

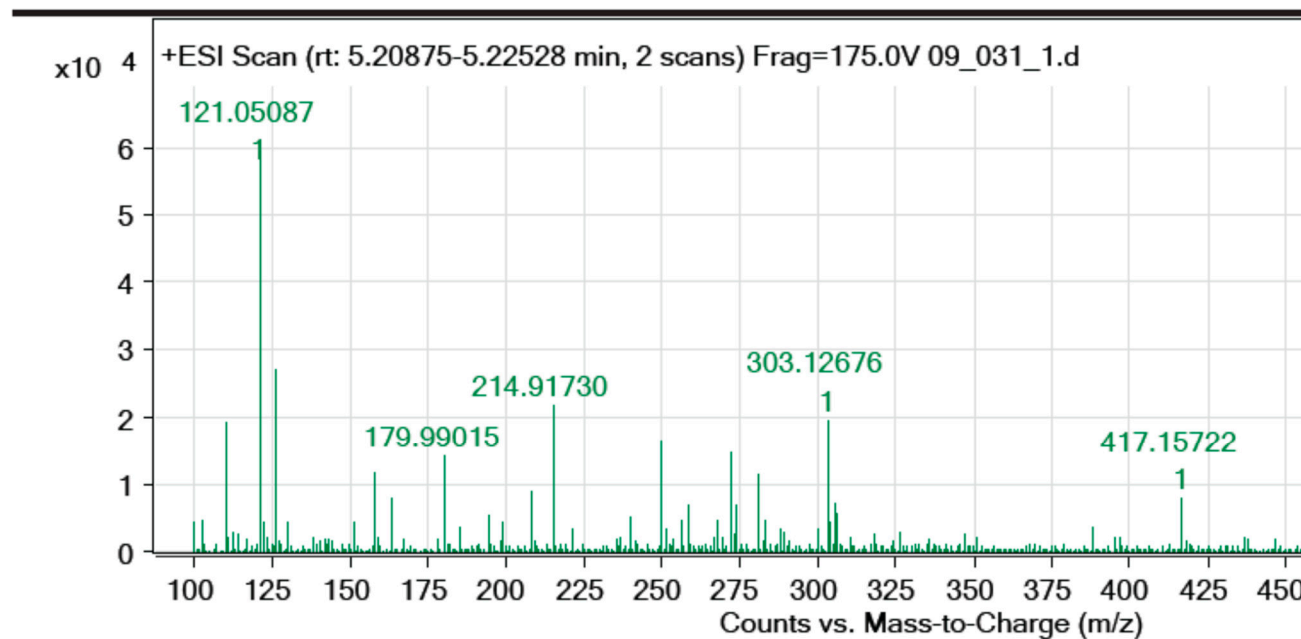

#### Formula Calculator Results

| Formula        | Best | Mass      | Tgt Mass  | Diff (ppm) | Ion Species    | Score |
|----------------|------|-----------|-----------|------------|----------------|-------|
| C12 H15 N3 O S | True | 249.09357 | 249.09358 | 0.04       | C12 H16 N3 O S | 95.5  |

**Figure S79.** Mass spectrum and the result of the HRMS analysis for compound **19**.

### **3. Cartesian coordinates of ligands docked into AChE and BChE**

Molecule 1 docked into AChE

|    |        |        |        |
|----|--------|--------|--------|
| N  | 0.578  | 28.912 | 35.616 |
| C  | 1.905  | 28.793 | 35.904 |
| C  | 2.488  | 28.580 | 34.656 |
| N  | 1.507  | 28.569 | 33.706 |
| N  | 0.378  | 28.761 | 34.294 |
| C  | 2.683  | 28.851 | 37.107 |
| C  | 4.089  | 28.691 | 36.924 |
| C  | 4.659  | 28.481 | 35.619 |
| H  | 5.752  | 28.364 | 35.525 |
| C  | 3.891  | 28.422 | 34.499 |
| H  | 4.340  | 28.258 | 33.505 |
| C  | 4.925  | 28.740 | 38.061 |
| H  | 6.014  | 28.620 | 37.932 |
| C  | 4.419  | 28.933 | 39.324 |
| H  | 5.091  | 28.970 | 40.198 |
| C  | 3.031  | 29.082 | 39.482 |
| C  | 2.171  | 29.044 | 38.409 |
| H  | 1.086  | 29.164 | 38.565 |
| Cl | 2.388  | 29.317 | 41.085 |
| C  | -0.572 | 29.066 | 36.515 |
| H  | -0.217 | 28.923 | 37.562 |
| C  | -1.609 | 27.986 | 36.211 |
| H  | -2.483 | 28.103 | 36.894 |
| H  | -1.174 | 26.960 | 36.257 |
| H  | -1.912 | 27.984 | 35.138 |
| C  | -1.157 | 30.469 | 36.399 |
| H  | -2.031 | 30.586 | 37.082 |
| H  | -1.418 | 30.723 | 35.345 |
| H  | -0.386 | 31.255 | 36.574 |

Molecule 4 docked into AChE

|   |        |        |        |
|---|--------|--------|--------|
| C | -2.482 | 28.098 | 35.517 |
| H | -3.478 | 27.893 | 35.944 |
| C | -2.134 | 27.555 | 34.279 |
| C | -0.872 | 27.818 | 33.747 |
| H | -0.592 | 27.387 | 32.771 |
| C | 0.038  | 28.617 | 34.431 |
| H | 1.034  | 28.829 | 34.007 |
| C | -0.337 | 29.141 | 35.659 |
| C | -1.583 | 28.895 | 36.216 |
| H | -1.855 | 29.324 | 37.195 |
| F | 0.535  | 29.905 | 36.331 |
| C | -3.121 | 26.710 | 33.499 |
| H | -3.334 | 25.753 | 34.029 |
| H | -4.140 | 27.161 | 33.524 |
| N | -2.696 | 26.465 | 32.138 |
| N | -2.517 | 25.195 | 31.706 |
| N | -2.103 | 25.213 | 30.492 |
| C | -1.992 | 26.522 | 30.090 |
| C | -1.588 | 27.057 | 28.845 |
| H | -1.298 | 26.397 | 28.010 |
| C | -2.365 | 27.345 | 31.156 |
| C | -1.567 | 28.422 | 28.707 |
| H | -1.263 | 28.877 | 27.749 |
| C | -1.938 | 29.247 | 29.802 |
| C | -2.342 | 28.755 | 31.054 |
| S | -1.952 | 30.986 | 29.796 |
| C | -2.647 | 29.802 | 31.988 |
| H | -2.977 | 29.625 | 33.026 |
| C | -2.482 | 31.033 | 31.445 |
| H | -2.666 | 31.970 | 31.997 |

Molecule 17 docked into AChE

|   |       |        |        |
|---|-------|--------|--------|
| S | 3.274 | 28.938 | 39.542 |
| C | 2.961 | 28.674 | 37.870 |
| C | 1.712 | 29.137 | 37.525 |
| C | 1.008 | 29.724 | 38.624 |

|   |        |        |        |
|---|--------|--------|--------|
| H | -0.002 | 30.160 | 38.547 |
| C | 1.733  | 29.680 | 39.777 |
| H | 1.378  | 30.072 | 40.745 |
| C | 3.884  | 27.947 | 36.923 |
| H | 3.734  | 26.843 | 36.973 |
| H | 4.943  | 27.993 | 37.270 |
| C | 3.739  | 28.472 | 35.479 |
| H | 4.259  | 27.821 | 34.738 |
| H | 4.325  | 29.405 | 35.308 |
| C | 2.287  | 28.647 | 35.159 |
| C | 1.361  | 28.978 | 36.124 |
| N | 1.660  | 28.568 | 33.964 |
| N | 0.397  | 28.824 | 34.137 |
| N | 0.197  | 29.071 | 35.444 |
| C | -1.128 | 29.392 | 35.954 |
| H | -1.225 | 29.126 | 37.032 |
| H | -1.902 | 28.707 | 35.536 |
| C | -1.486 | 30.856 | 35.706 |
| H | -2.589 | 31.017 | 35.682 |
| H | -1.251 | 31.172 | 34.663 |
| N | -0.833 | 31.705 | 36.692 |
| C | -0.370 | 32.965 | 36.115 |
| H | -1.194 | 33.524 | 35.613 |
| H | 0.282  | 32.804 | 35.225 |
| C | 0.318  | 33.799 | 37.186 |
| H | 0.743  | 34.740 | 36.764 |
| H | 1.266  | 33.324 | 37.531 |
| O | -0.555 | 34.060 | 38.264 |
| C | -1.006 | 32.851 | 38.838 |
| H | -1.638 | 33.034 | 39.738 |
| H | -0.174 | 32.292 | 39.326 |
| C | -1.729 | 31.996 | 37.809 |
| H | -2.154 | 31.068 | 38.258 |
| H | -2.683 | 32.463 | 37.471 |

Molecule 1 docked into BChE



|    |         |         |        |
|----|---------|---------|--------|
| N  | 131.042 | 112.533 | 41.066 |
| C  | 131.022 | 113.642 | 41.858 |
| C  | 130.332 | 113.215 | 42.992 |
| N  | 129.969 | 111.910 | 42.823 |
| N  | 130.392 | 111.521 | 41.672 |
| C  | 131.530 | 114.977 | 41.735 |
| C  | 131.288 | 115.821 | 42.859 |
| C  | 130.578 | 115.345 | 44.018 |
| H  | 130.416 | 116.032 | 44.865 |
| C  | 130.102 | 114.075 | 44.100 |
| H  | 129.558 | 113.725 | 44.993 |
| C  | 131.762 | 117.150 | 42.816 |
| H  | 131.584 | 117.811 | 43.681 |
| C  | 132.438 | 117.643 | 41.727 |
| H  | 132.800 | 118.685 | 41.716 |
| C  | 132.660 | 116.797 | 40.627 |
| C  | 132.222 | 115.493 | 40.617 |
| H  | 132.411 | 114.853 | 39.739 |
| Cl | 133.509 | 117.424 | 39.241 |
| C  | 131.552 | 112.358 | 39.701 |
| H  | 131.912 | 113.348 | 39.335 |
| C  | 130.420 | 111.895 | 38.786 |
| H  | 130.807 | 111.762 | 37.749 |
| H  | 129.543 | 112.582 | 38.822 |
| H  | 129.919 | 110.975 | 39.169 |
| C  | 132.729 | 111.390 | 39.690 |
| H  | 133.116 | 111.257 | 38.653 |
| H  | 132.468 | 110.415 | 40.163 |
| H  | 133.533 | 111.707 | 40.395 |

Molecule 4 docked into BChE

|   |         |         |        |
|---|---------|---------|--------|
| C | 132.970 | 115.489 | 37.287 |
| H | 132.973 | 114.391 | 37.388 |
| C | 133.288 | 116.286 | 38.388 |
| C | 133.283 | 117.674 | 38.251 |
| H | 133.531 | 118.307 | 39.119 |
| C | 132.970 | 118.270 | 37.034 |

|   |         |         |        |
|---|---------|---------|--------|
| H | 132.971 | 119.368 | 36.926 |
| C | 132.657 | 117.450 | 35.960 |
| C | 132.650 | 116.067 | 36.064 |
| H | 132.396 | 115.439 | 35.194 |
| F | 132.346 | 118.014 | 34.784 |
| C | 133.666 | 115.659 | 39.714 |
| H | 134.743 | 115.833 | 39.946 |
| H | 133.674 | 114.546 | 39.642 |
| N | 132.822 | 116.102 | 40.804 |
| N | 132.905 | 117.378 | 41.246 |
| N | 132.105 | 117.538 | 42.236 |
| C | 131.468 | 116.345 | 42.478 |
| C | 130.494 | 116.017 | 43.449 |
| H | 130.130 | 116.772 | 44.166 |
| C | 131.935 | 115.401 | 41.559 |
| C | 130.015 | 114.733 | 43.473 |
| H | 129.251 | 114.441 | 44.213 |
| C | 130.506 | 113.780 | 42.541 |
| C | 131.473 | 114.064 | 41.563 |
| S | 130.015 | 112.114 | 42.447 |
| C | 131.803 | 112.921 | 40.761 |
| H | 132.543 | 112.935 | 39.943 |
| C | 131.098 | 111.822 | 41.126 |
| H | 131.203 | 110.841 | 40.632 |

Molecule 9 docked into BChE

|   |         |         |        |
|---|---------|---------|--------|
| C | 131.765 | 114.410 | 41.555 |
| H | 132.310 | 114.534 | 40.604 |
| C | 131.414 | 115.540 | 42.288 |
| C | 130.727 | 115.354 | 43.494 |
| H | 130.440 | 116.233 | 44.095 |
| C | 130.401 | 114.086 | 43.946 |
| H | 129.858 | 113.963 | 44.898 |
| C | 130.760 | 112.961 | 43.195 |
| C | 131.446 | 113.124 | 41.992 |
| H | 131.734 | 112.245 | 41.392 |
| C | 131.806 | 116.922 | 41.826 |

|   |         |         |        |
|---|---------|---------|--------|
| H | 131.848 | 117.651 | 42.669 |
| H | 131.000 | 117.411 | 41.231 |
| C | 133.125 | 116.851 | 41.059 |
| H | 133.430 | 115.793 | 40.882 |
| H | 133.978 | 117.179 | 41.697 |
| N | 133.086 | 117.601 | 39.811 |
| C | 133.043 | 117.118 | 38.543 |
| C | 133.025 | 115.819 | 37.979 |
| C | 133.015 | 118.266 | 37.748 |
| C | 133.043 | 114.507 | 38.563 |
| H | 133.078 | 114.316 | 39.649 |
| C | 132.978 | 115.787 | 36.577 |
| C | 133.012 | 113.530 | 37.623 |
| H | 133.020 | 112.454 | 37.864 |
| S | 132.959 | 114.145 | 36.004 |
| C | 132.951 | 116.947 | 35.758 |
| H | 132.916 | 116.848 | 34.660 |
| C | 132.969 | 118.191 | 36.337 |
| H | 132.948 | 119.105 | 35.720 |
| N | 133.042 | 119.362 | 38.574 |
| N | 133.083 | 118.951 | 39.792 |
| O | 130.394 | 111.762 | 43.717 |
| C | 130.707 | 111.520 | 45.071 |
| H | 130.406 | 110.536 | 45.500 |
| H | 130.287 | 112.340 | 45.699 |
| H | 131.800 | 111.674 | 45.230 |

#### **4. Estimated free energies of binding obtained by molecular docking**

**Table S1.** Free energies of binding,  $\Delta G_{\text{bind}}$  obtained by molecular docking of listed molecules into the active site of BChE, along with the number of conformational clusters and distribution of conformations.

| Compound    | $\Delta G_{\text{bind}}/\text{kcal mol}^{-1}$ |         | Number of distinctive conformational clusters | Distribution of conformations within clusters with $n > 1$ ( $n$ = cluster population) |
|-------------|-----------------------------------------------|---------|-----------------------------------------------|----------------------------------------------------------------------------------------|
|             | lowest                                        | highest |                                               |                                                                                        |
| <b>1</b>    | −5.92                                         | −5.71   | 1                                             | 25                                                                                     |
| <b>3</b>    | −6.13                                         | −5.85   | 4                                             | 7, 11, 6                                                                               |
| <b>4</b>    | −5.96                                         | −5.61   | 5                                             | 12, 8, 2, 2                                                                            |
| <b>5</b>    | −5.91                                         | −5.52   | 5                                             | 2, 15, 5, 2                                                                            |
| <b>6</b>    | −5.85                                         | −4.82   | 10                                            | 5, 4, 6, 2, 3                                                                          |
| <b>9</b>    | −6.37                                         | −5.45   | 10                                            | 4, 3, 5, 4, 3, 2, 3                                                                    |
| <b>13</b>   | −6.11                                         | −5.70   | 6                                             | 5, 8, 9                                                                                |
| Galantamine | −6.26                                         | −6.17   | 1                                             | 25                                                                                     |

#### **5. Crystallographic details and crystal structure of compound 5**

**Table S2.** Crystallographic, data collection and refinement data.

|                                   |                                                               |
|-----------------------------------|---------------------------------------------------------------|
| Compound                          | <b>5</b>                                                      |
| Empirical formula                 | C <sub>26</sub> H <sub>18</sub> N <sub>6</sub> S <sub>4</sub> |
| Formula wt. / g mol <sup>−1</sup> | 542.70                                                        |

---

|                                           |                                                        |
|-------------------------------------------|--------------------------------------------------------|
| Colour                                    | yellow                                                 |
| Crystal dimensions / mm                   | 0.22 x 0.09 x 0.02                                     |
| Space group                               | $P 2_1/n$                                              |
| $a / \text{\AA}$                          | 9.98930(10)                                            |
| $b / \text{\AA}$                          | 13.47420(10)                                           |
| $c / \text{\AA}$                          | 18.3819(3)                                             |
| $\alpha / ^\circ$                         | 90                                                     |
| $\beta / ^\circ$                          | 97.2340(10)                                            |
| $\gamma / ^\circ$                         | 90                                                     |
| $Z$                                       | 2                                                      |
| $V / \text{\AA}^3$                        | 2454.47(5)                                             |
| $D_{\text{calc}} / \text{g cm}^{-3}$      | 1.469                                                  |
| $\lambda / \text{\AA}$                    | 1.54179 (CuK $\alpha$ )                                |
| $\mu / \text{mm}^{-1}$                    | 3.792                                                  |
| $\theta$ range / $^\circ$                 | 4.08 – 79.73                                           |
| $T / \text{K}$                            | 293(2)                                                 |
| Diffractometer type                       | Synergy S                                              |
| Range of $h, k, l$                        | $-11 < h < 12$ ;<br>$-17 < k < 17$ ;<br>$-23 < l < 23$ |
| Reflections collected                     | 38715                                                  |
| Independent reflections                   | 5301                                                   |
| Observed reflections ( $I \geq 2\sigma$ ) | 4621                                                   |
| Absorption correction                     | Multi-scan                                             |

---

---

|                                                                  |                |
|------------------------------------------------------------------|----------------|
| $T_{\min}, T_{\max}$                                             | 0.5661; 1.0000 |
| $R_{\text{int}}$                                                 | 0.0658         |
| $R(F)$                                                           | 0.0519         |
| $R_w(F^2)$                                                       | 0.1647         |
| Goodness of fit                                                  | 0.810          |
| H atom treatment                                                 | Constrained    |
| No. of parameters                                                | 325            |
| No. of restraints                                                | 0              |
| $\Delta\rho_{\max}, \Delta\rho_{\min} (\text{e}\text{\AA}^{-3})$ | 0.454; -0.495  |

---

## 6. Reorganized experimental results on the inhibitory activity of 1-19 (Table S2)

Table S3. Calculated IC<sub>50</sub> values for compounds 1-19.

| Compound | Structure | IC <sub>50</sub> (μM)<br>AChE | IC <sub>50</sub> (μM)<br>BChE | Compound    | Structure | IC <sub>50</sub> (μM)<br>AChE | IC <sub>50</sub> (μM)<br>BChE |
|----------|-----------|-------------------------------|-------------------------------|-------------|-----------|-------------------------------|-------------------------------|
| 1        |           | 59.9                          | 39.6                          | 2           |           | -                             | -                             |
| 3        |           | 116.0                         | 25.5                          | 5           |           | 118.6                         | 23.4                          |
| 4        |           | 97.0                          | 37.5                          | 13          |           | -                             | 58.0                          |
| 6        |           | -                             | 39.6                          | Galantamine |           | 0.15                          | 7.9                           |
| 7        |           | 139.6                         | > 150                         | 14          |           | 117.6                         | > 150                         |

|    |                                                                                    |      |       |
|----|------------------------------------------------------------------------------------|------|-------|
| 8  | 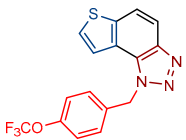  | 68.0 | 213.5 |
| 9  |   | -    | 18.6  |
| 10 |   | -    | -     |
| 11 |   | -    | -     |
| 12 |  | -    | 106.7 |

|    |                                                                                      |       |       |
|----|--------------------------------------------------------------------------------------|-------|-------|
| 15 | 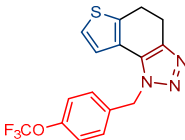  | 88.7  | -     |
| 16 |   | 145.3 | 119.4 |
| 17 |   | 45.6  | -     |
| 18 |   | -     | -     |
| 19 |  | -     | 74.1  |
